# Supplementary material for: Diversifying chemical space of DNA-encoded libraries: synthesis of 2-oxa-1-azaspiro(bicyclo[3.2.0])heptanes on-DNA via visible light-mediated energy transfer catalysis
Source: Royal Society of Chemistry journal article supplement (doi:10.1039/d3cc03421f), 2023-01-01
Supplement: d3cc03421f1.pdf [file d3cc03421f1.pdf]

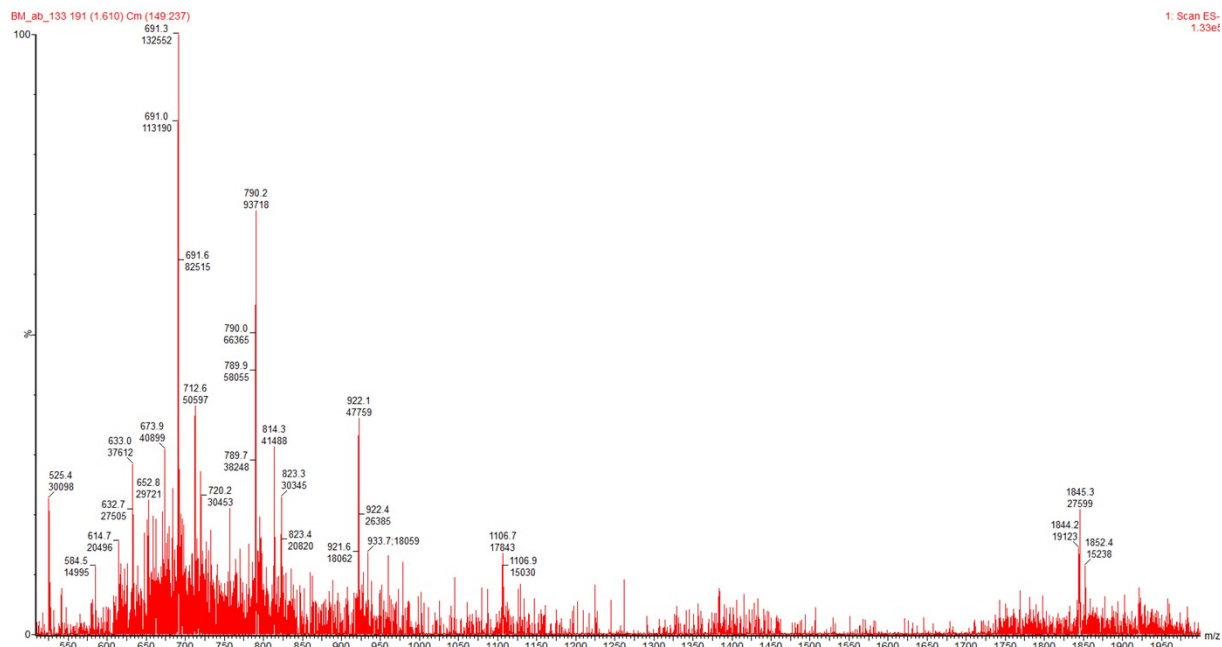

Raw MS of compound 10.

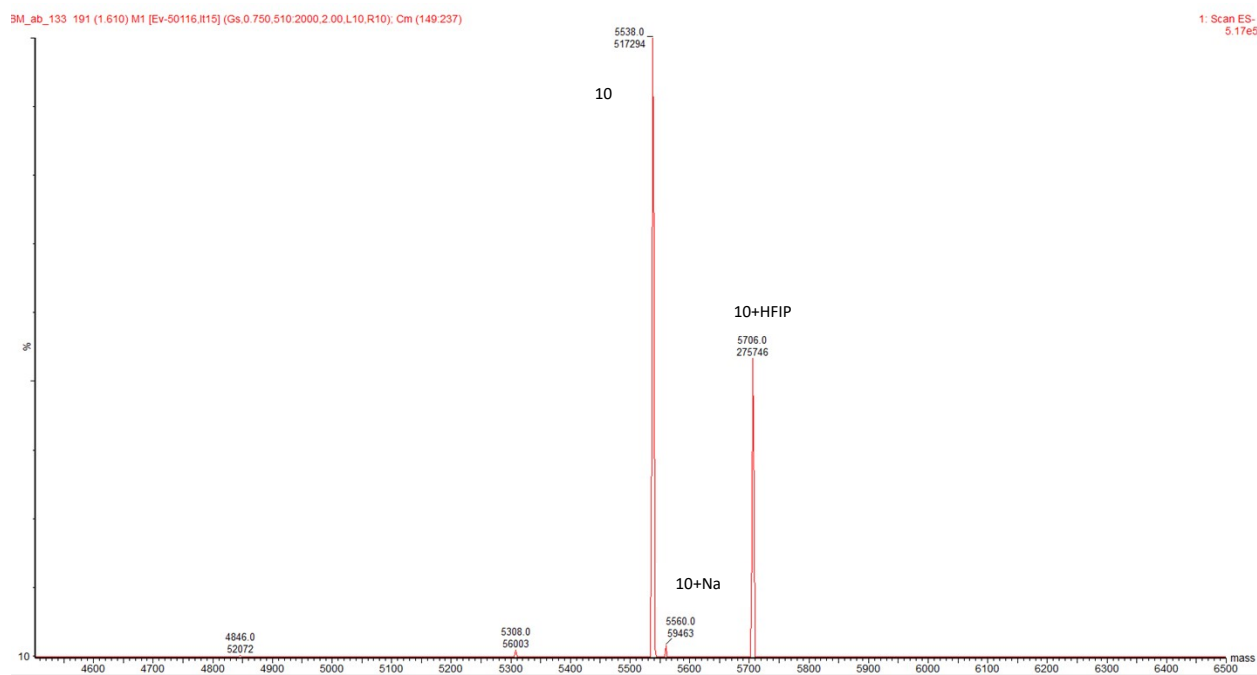

Deconvoluted MS of 10 (mass signals >10% of peak height).

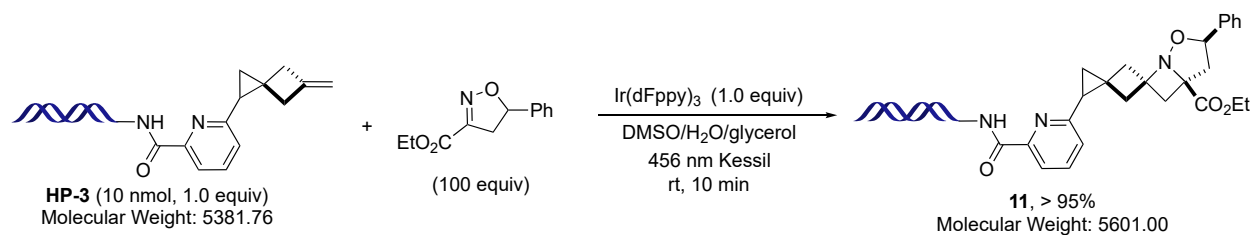

The title compound **11** was synthesized according to **GP-IV** from ethyl 5-phenyl-4,5-dihydroisoxazole-3-carboxylate and the DNA-tagged alkene **HP-3**. The product was formed with >95% conversion.

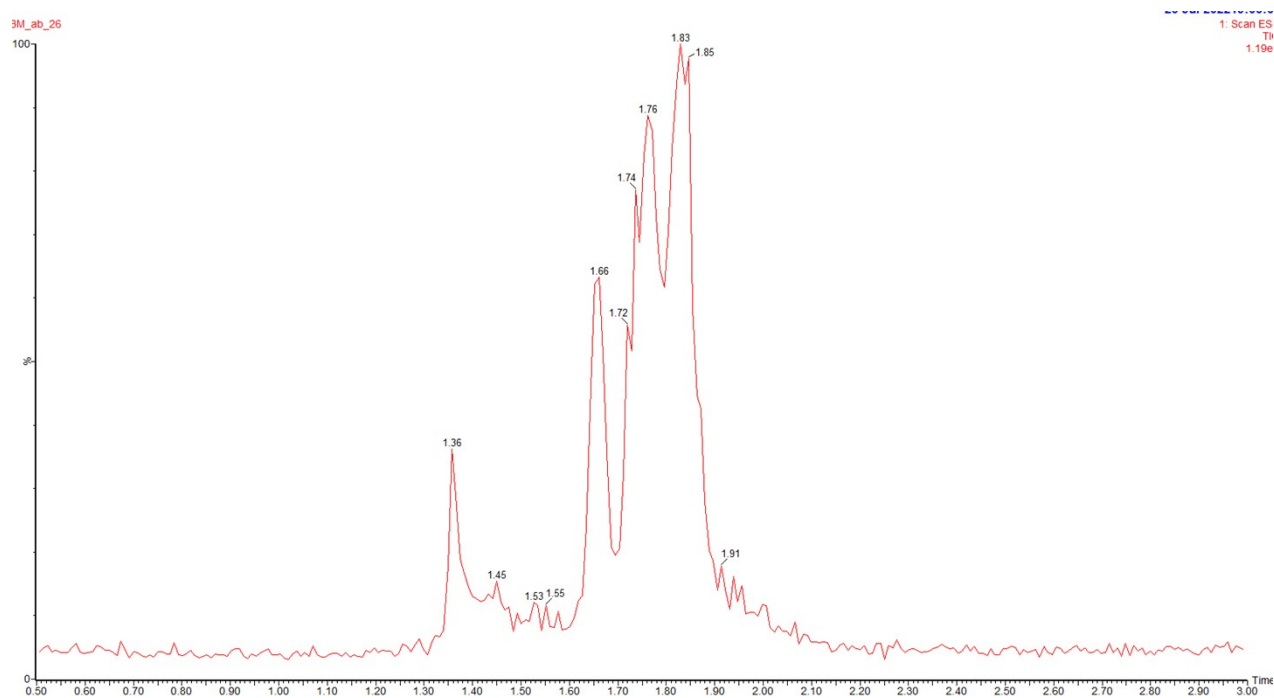

TIC of compound 11.

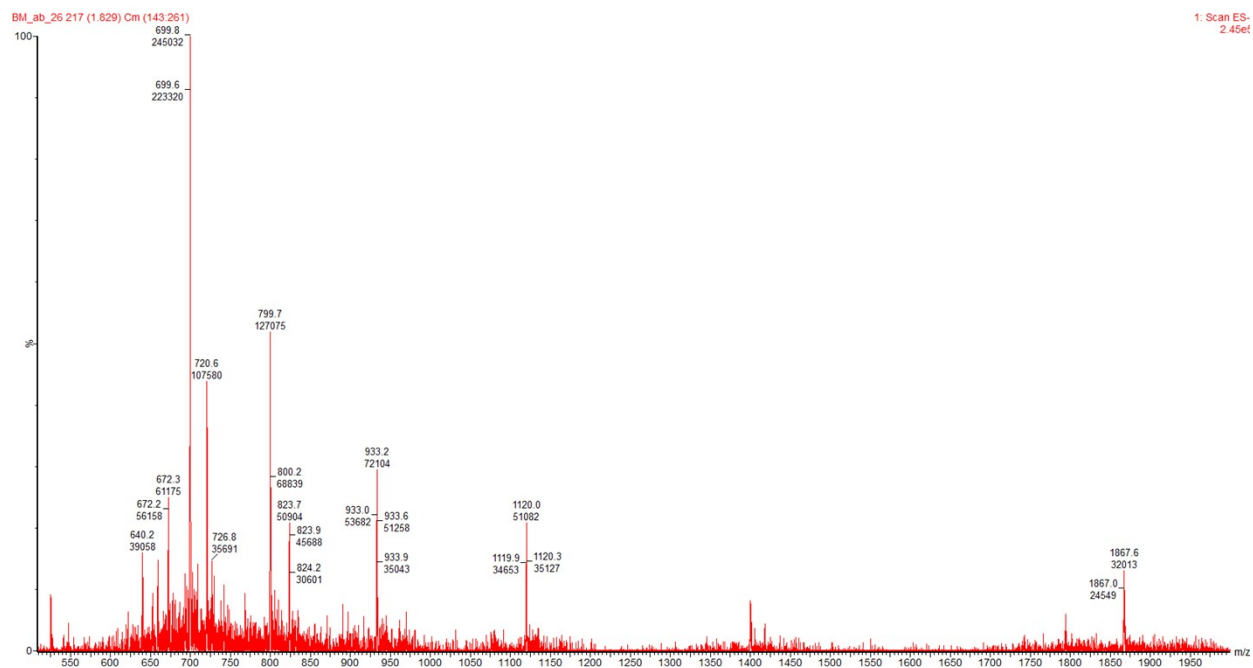

Raw MS of compound 11.

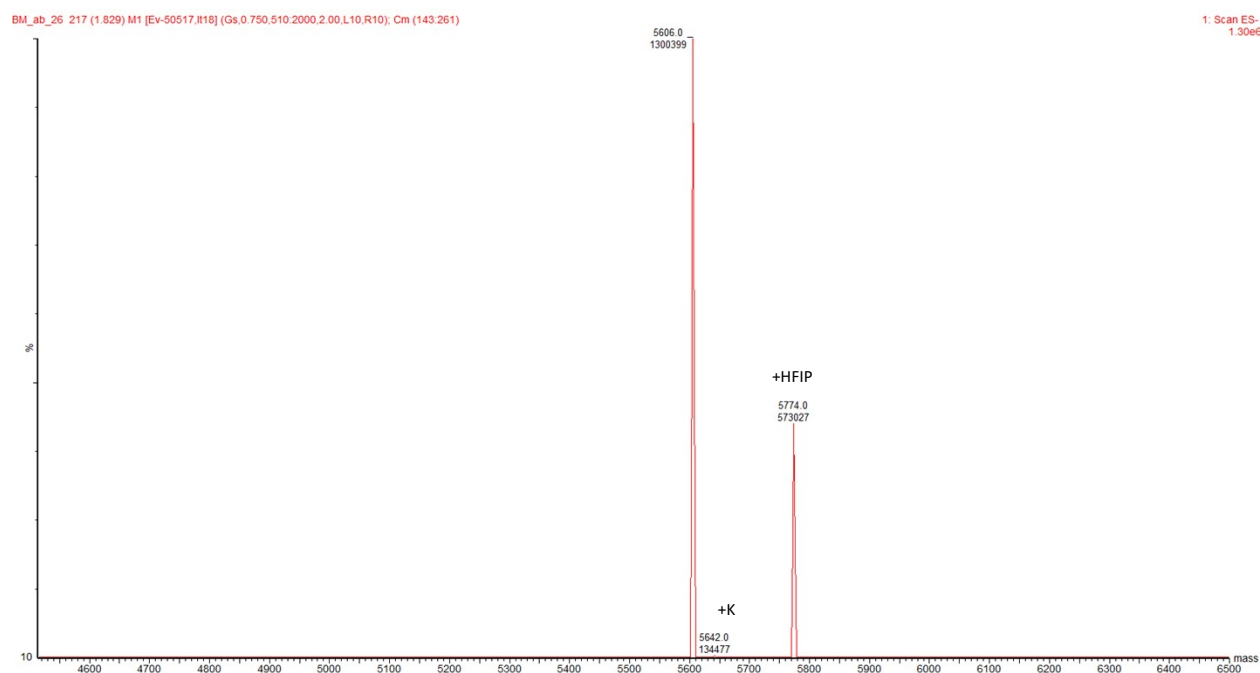

Deconvoluted MS of 11 (mass signals >10% of peak height).

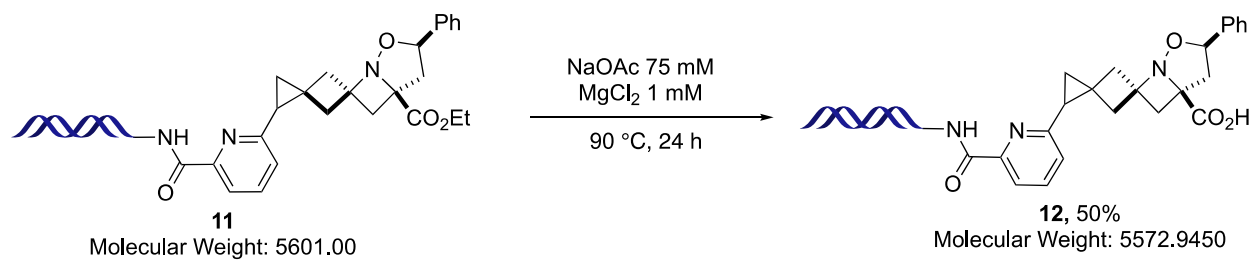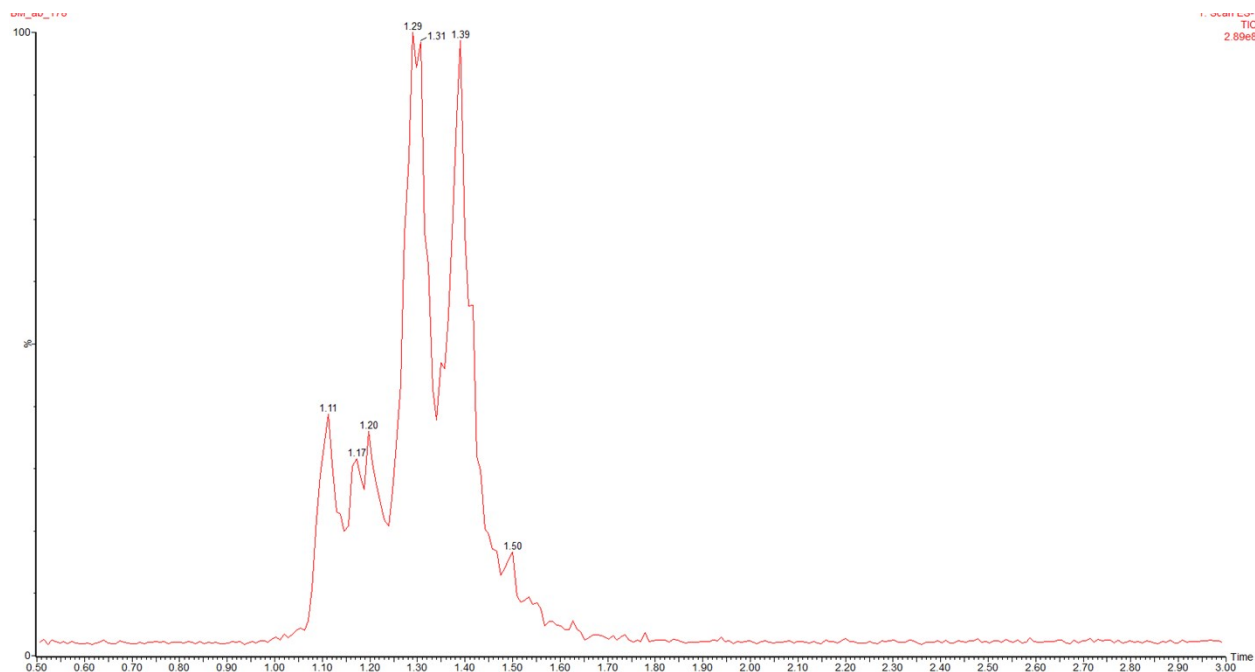

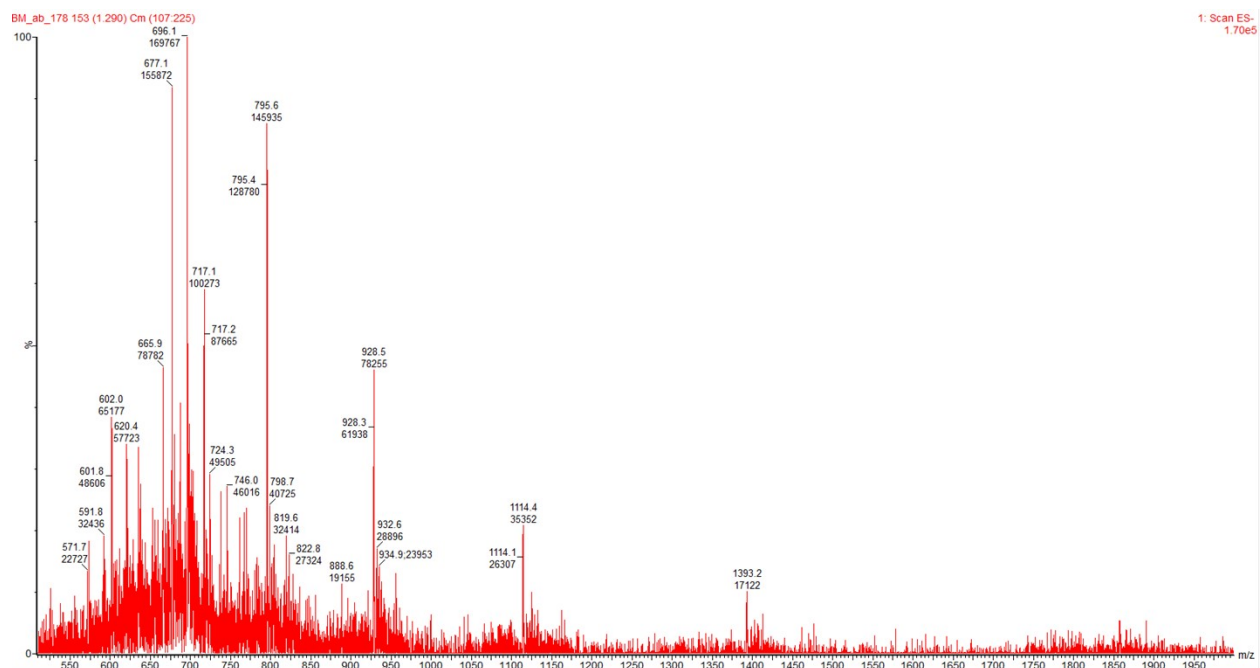

Raw MS of compound 12.

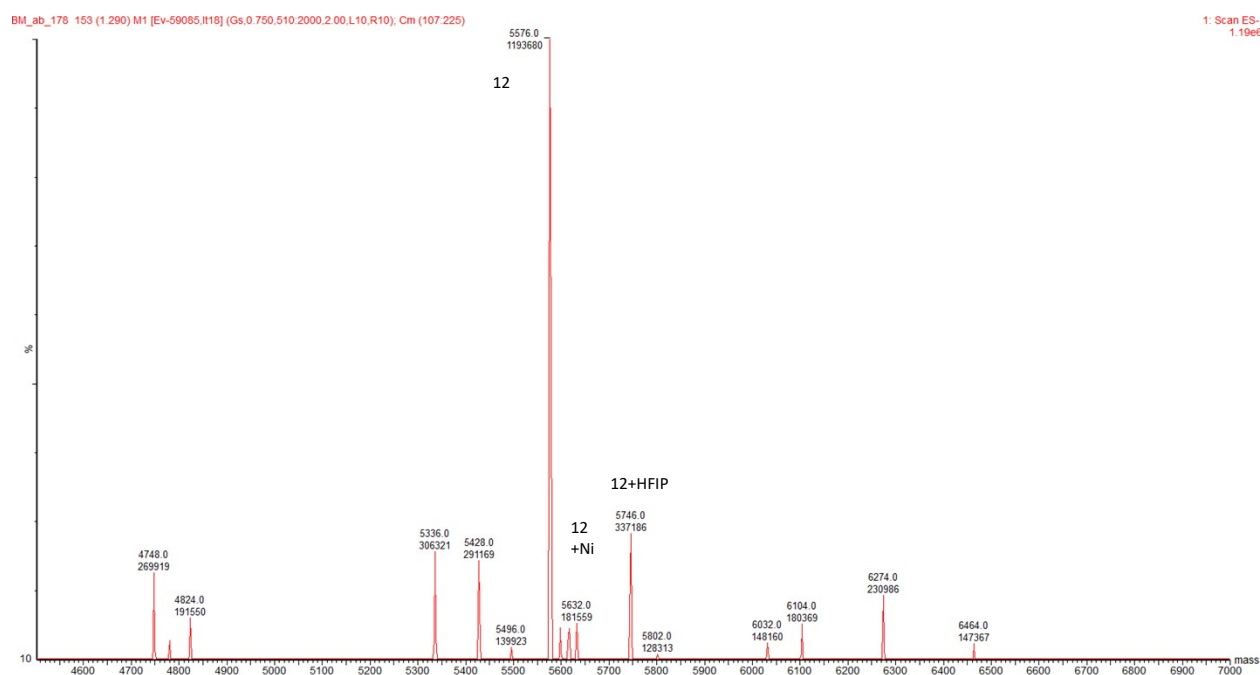

Deconvoluted MS of 12 (mass signals >10% of peak height).

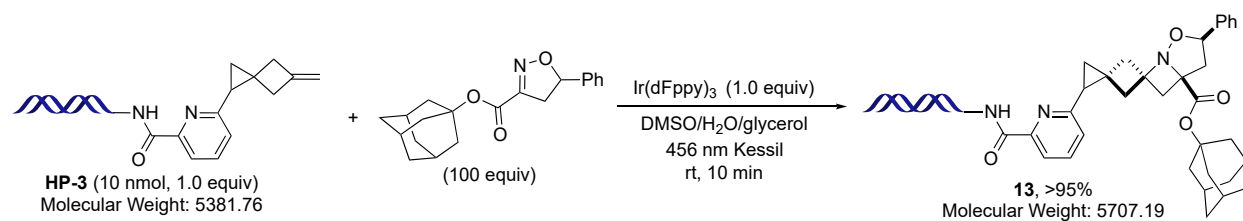

The title compound **13** was synthesized according to **GP-IV** from (3s,5s,7s)-adamantan-1-yl 5-phenyl-4,5-dihydroisoxazole-3-carboxylate and the DNA-tagged alkene **HP-3**. The product was formed with > 95% conversion.

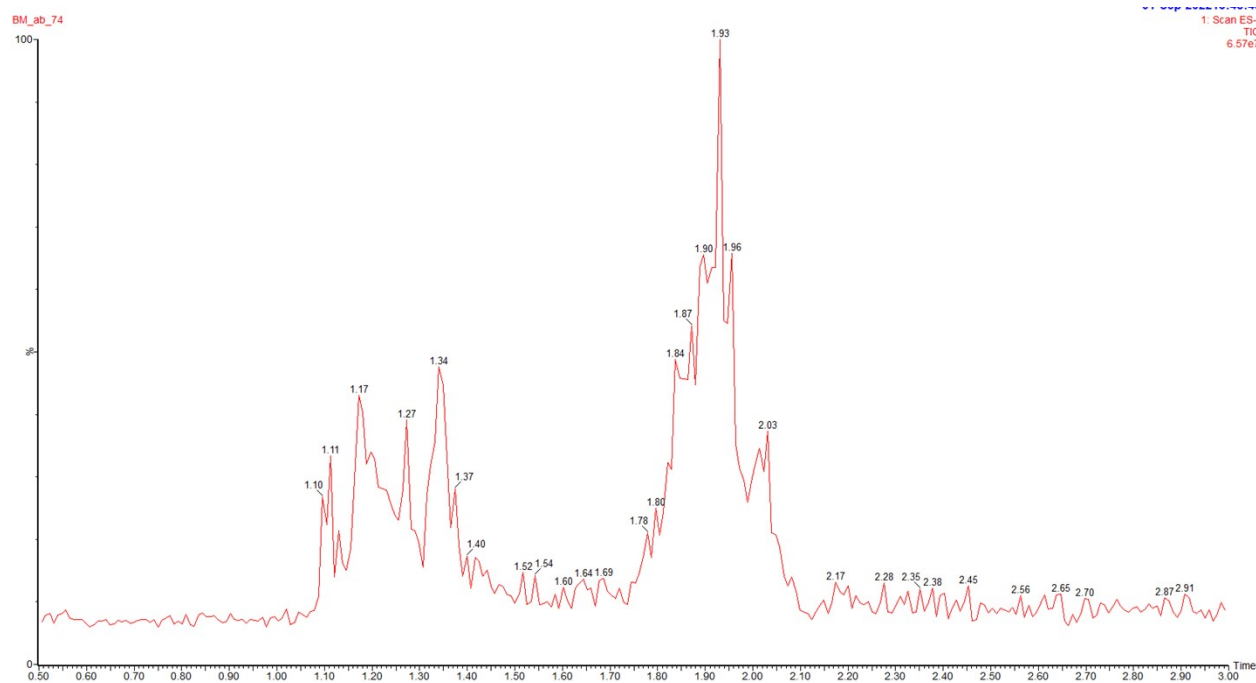

TIC of compound 13.

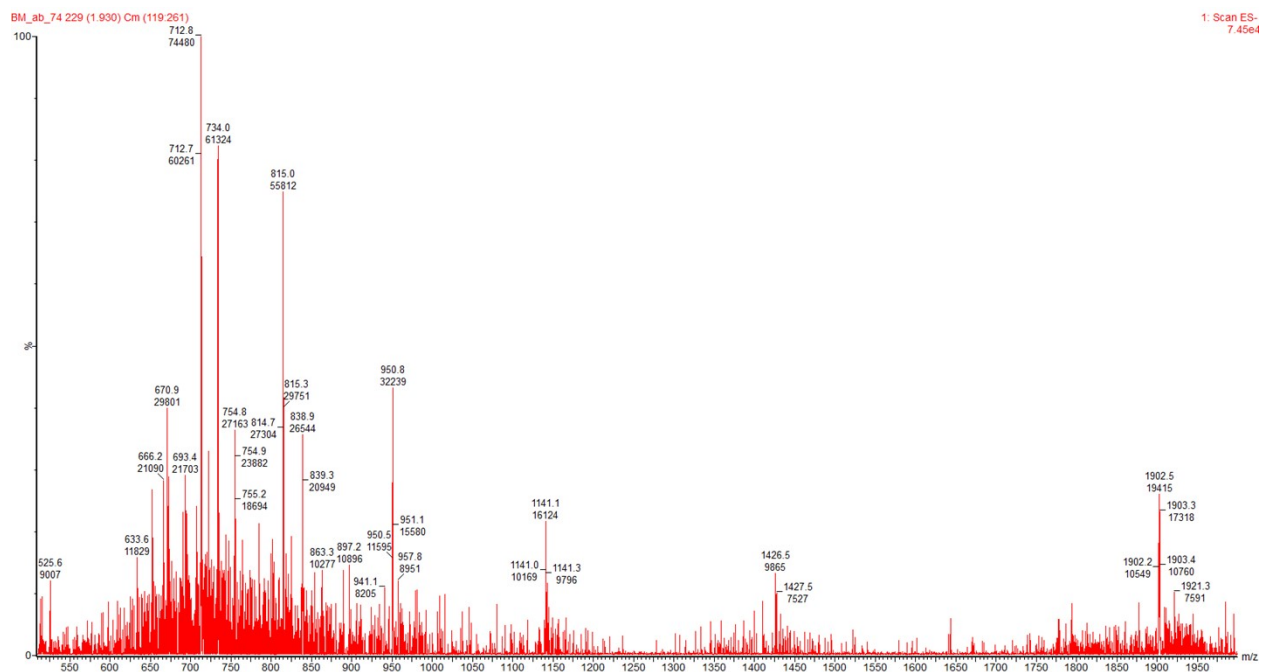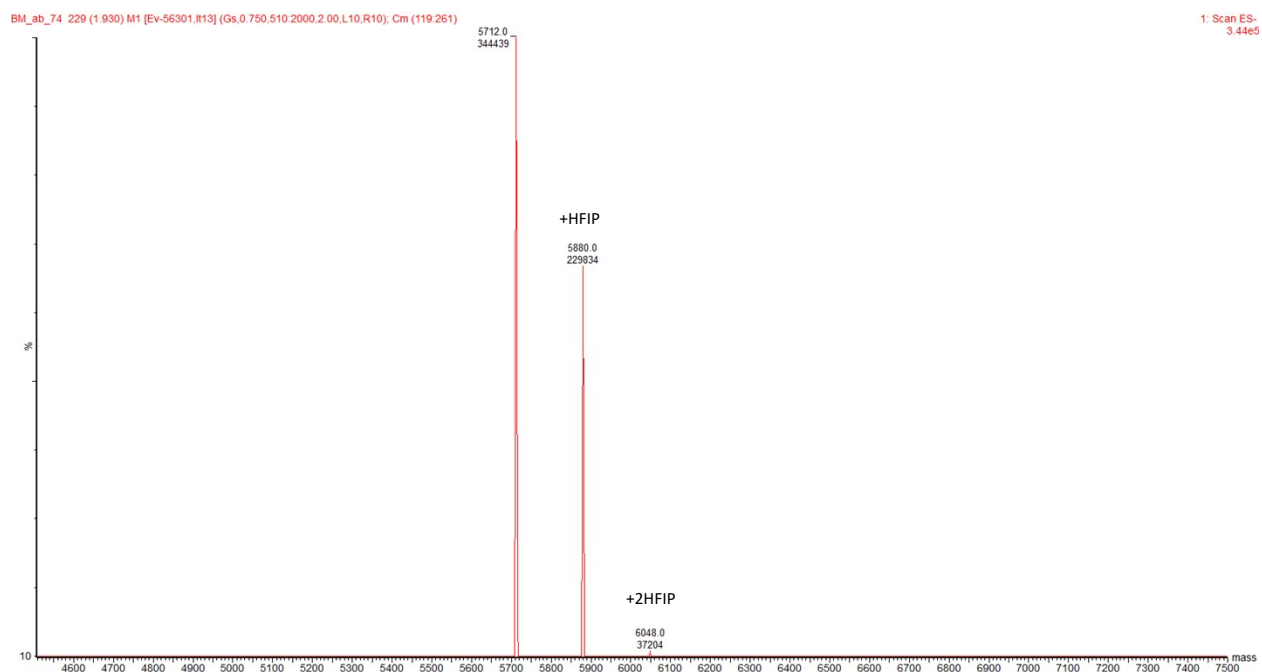

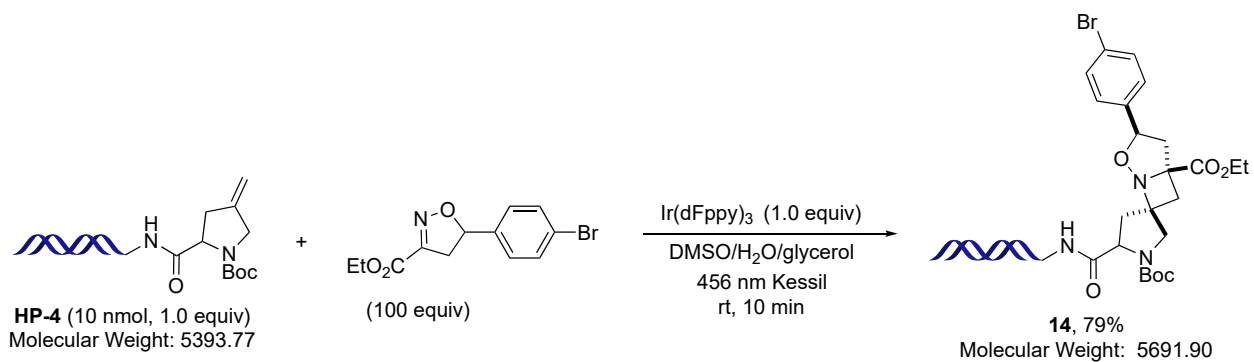

The title compound **14** was synthesized according to **GP-IV** from ethyl 5-(4-bromophenyl)-4,5-dihydroisoxazole-3-carboxylate and the DNA-tagged alkene **HP-4**. The product was formed with 79% conversion.

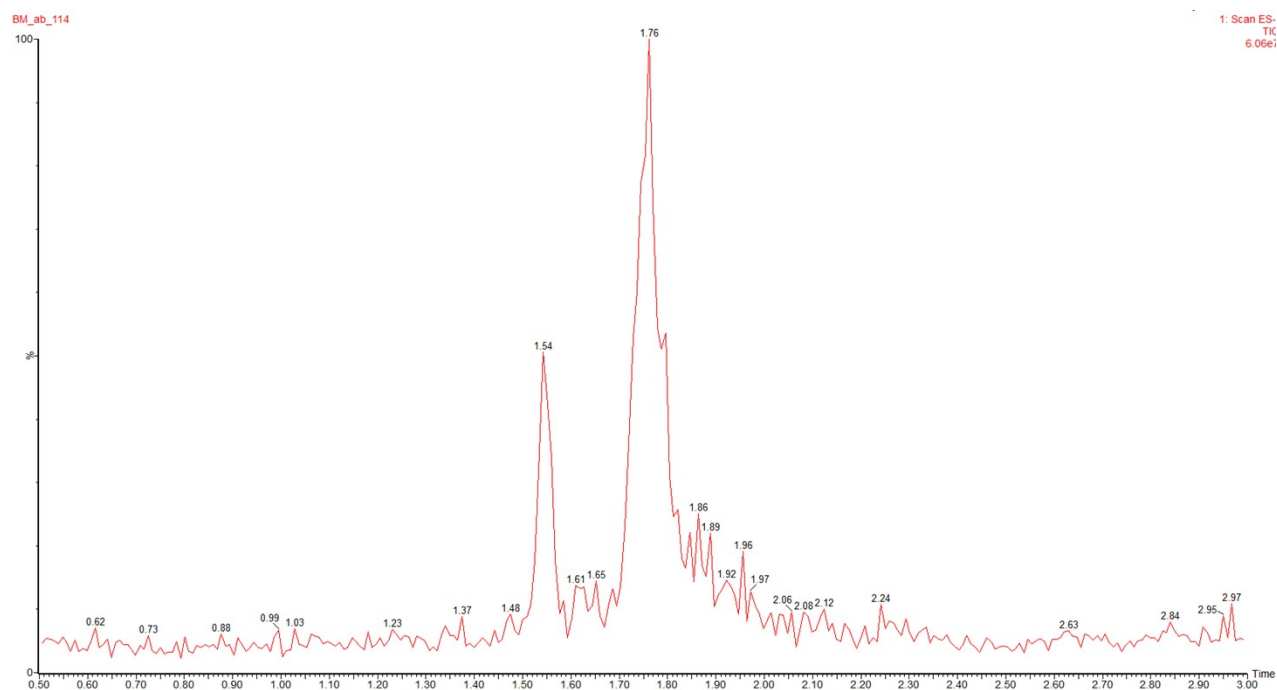

TIC of compound 14.

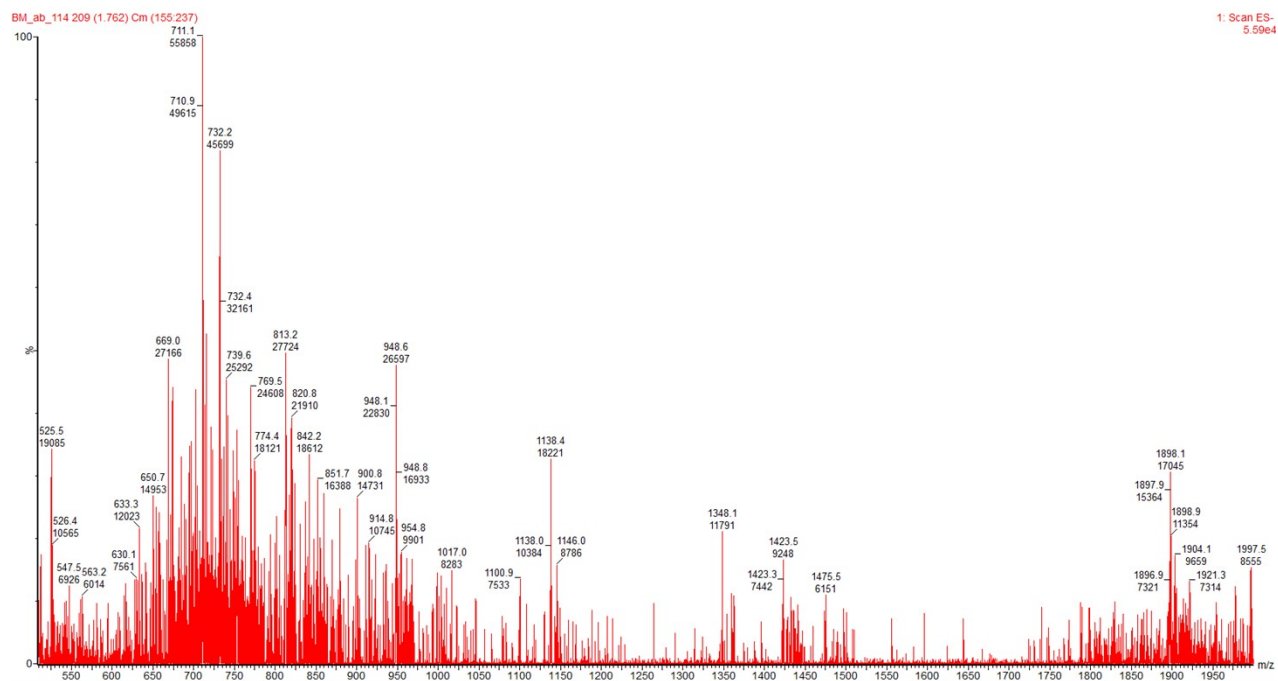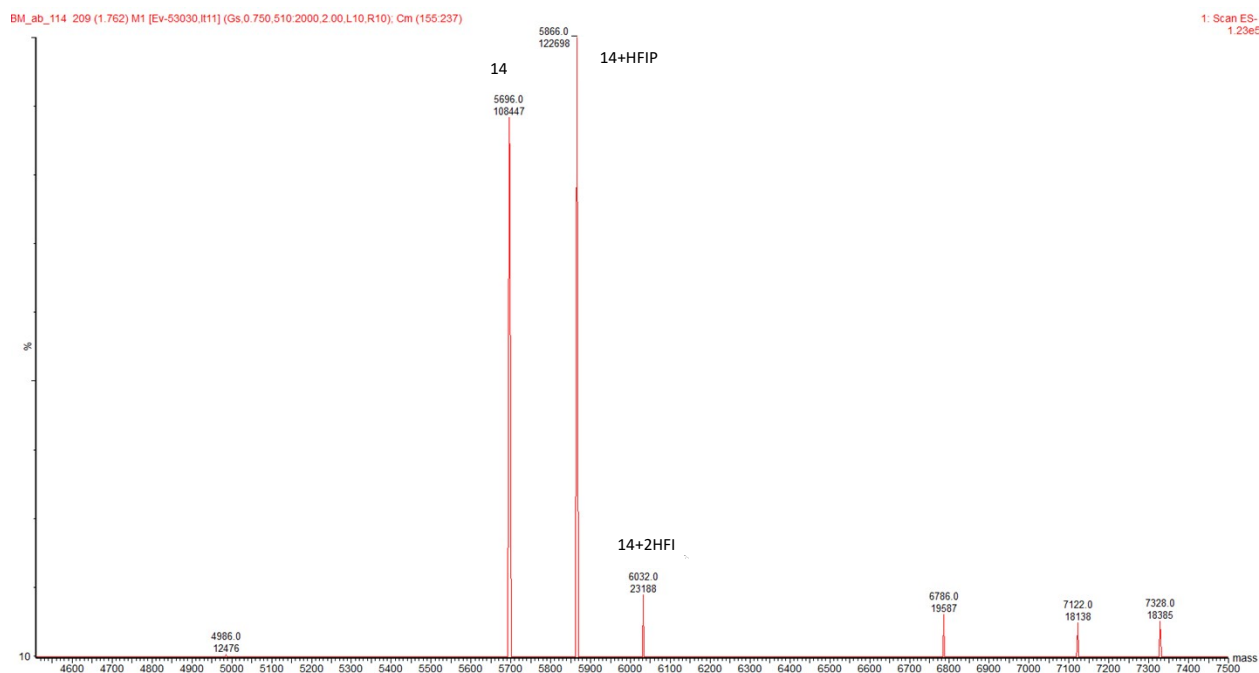

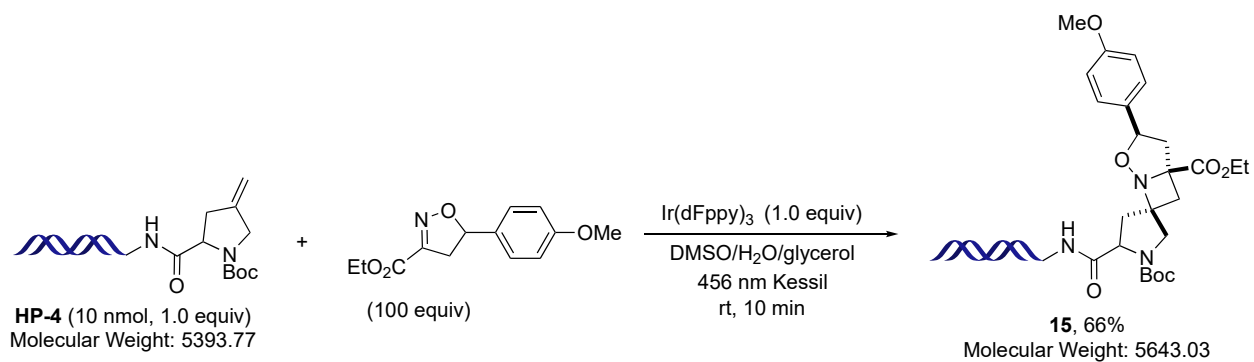

The title compound **15** was synthesized according to **GP-IV** from ethyl 5-(4-methoxyphenyl)-4,5-dihydroisoxazole-3-carboxylate and the DNA-tagged alkene **HP-4**. The product was formed with 66% conversion (8% recovered **HP-4**).

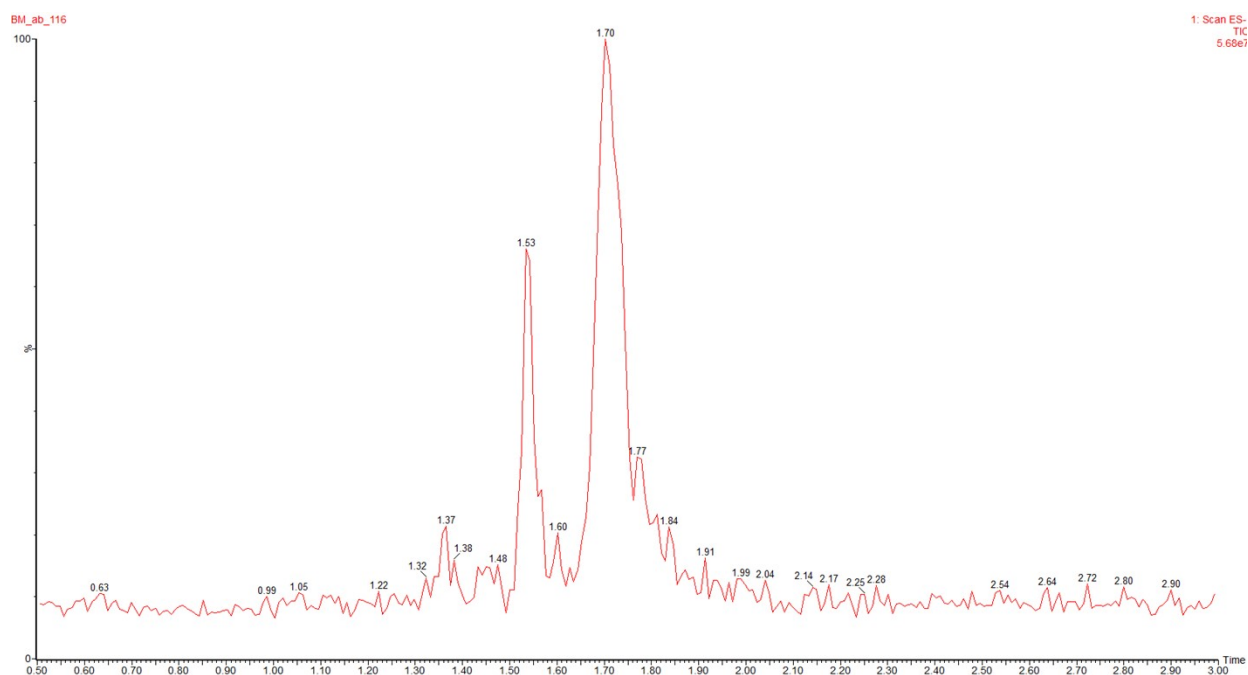

TIC of compound 15.

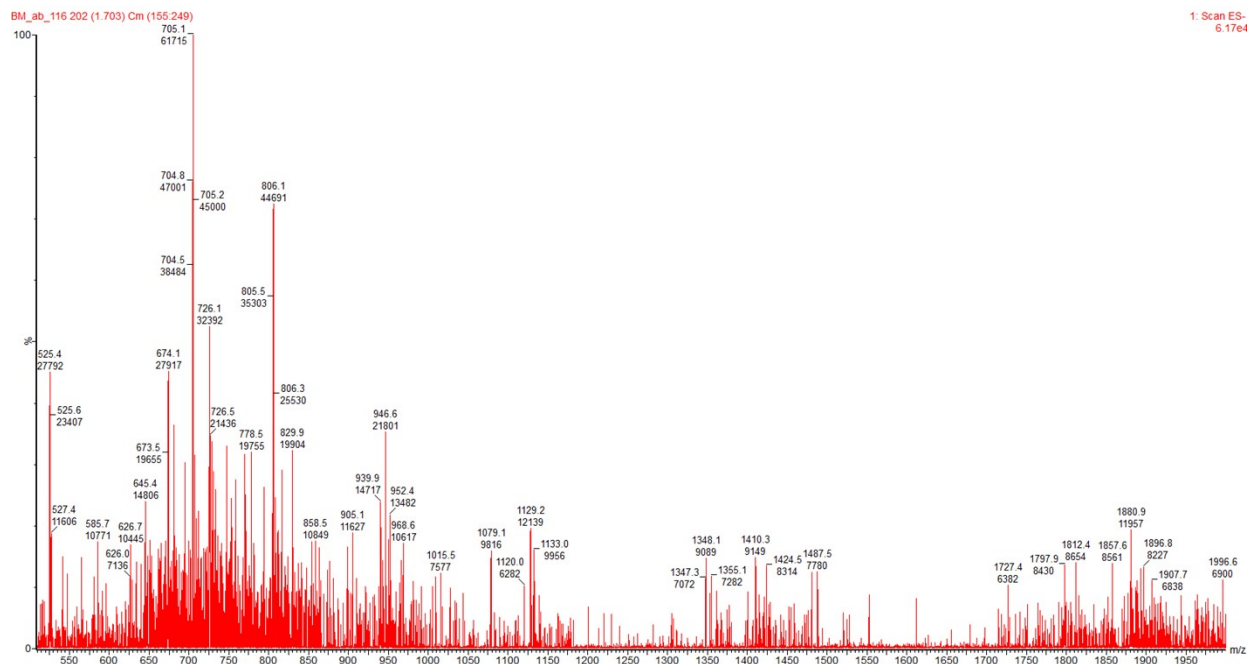

Raw MS of compound 15.

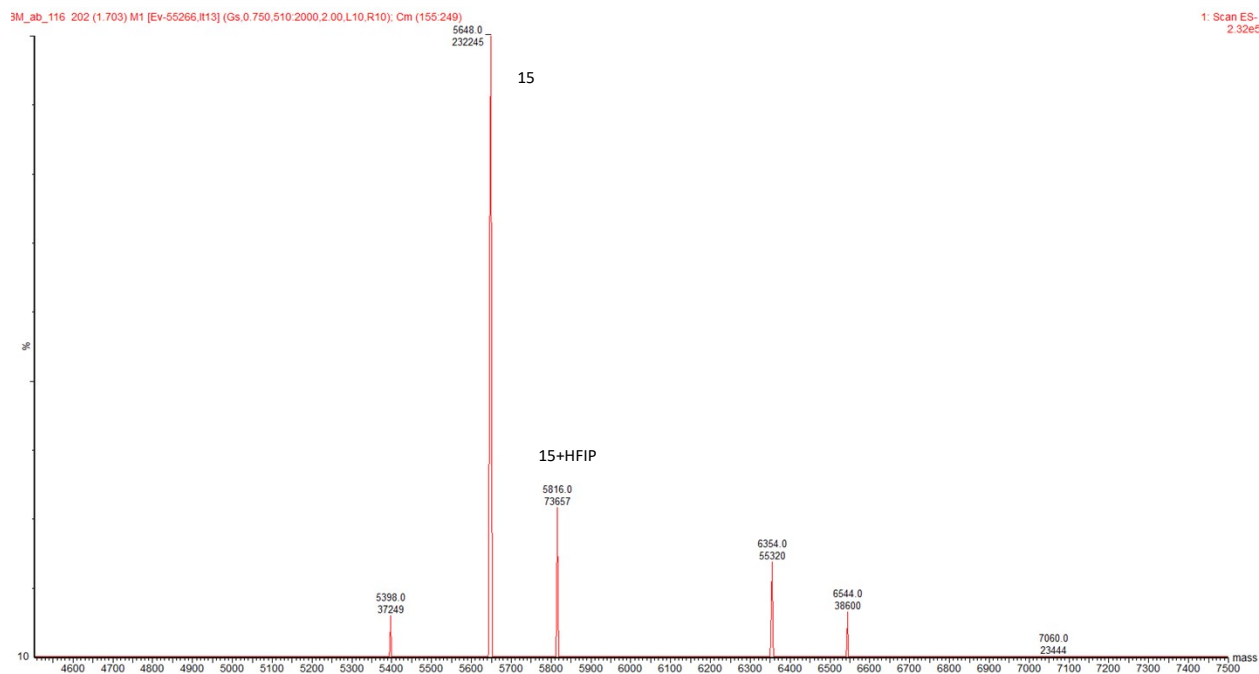

Deconvoluted MS of 15 (mass signals >10% of peak height).

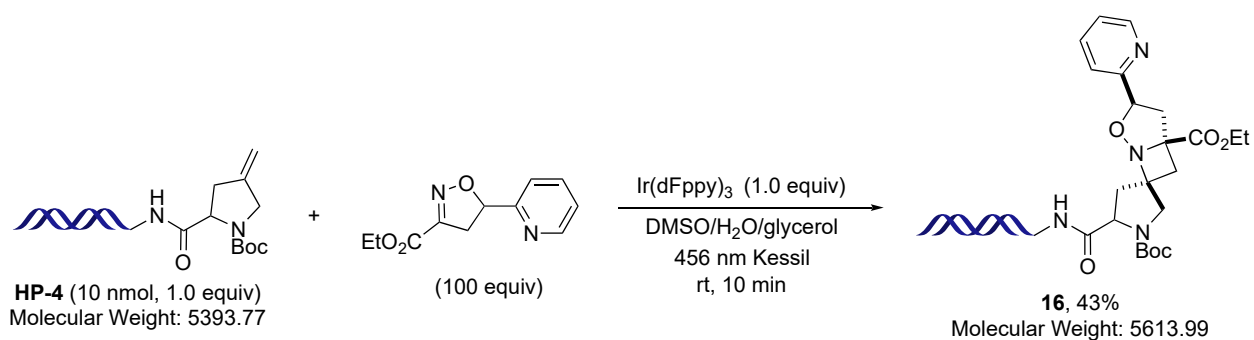

The title compound **16** was synthesized according to **GP-IV** from ethyl 5-(pyridin-2-yl)-4,5-dihydroisoxazole-3-carboxylate and the DNA-tagged alkene **HP-4**. The product was formed with 43% conversion (57% recovered **HP-4**).

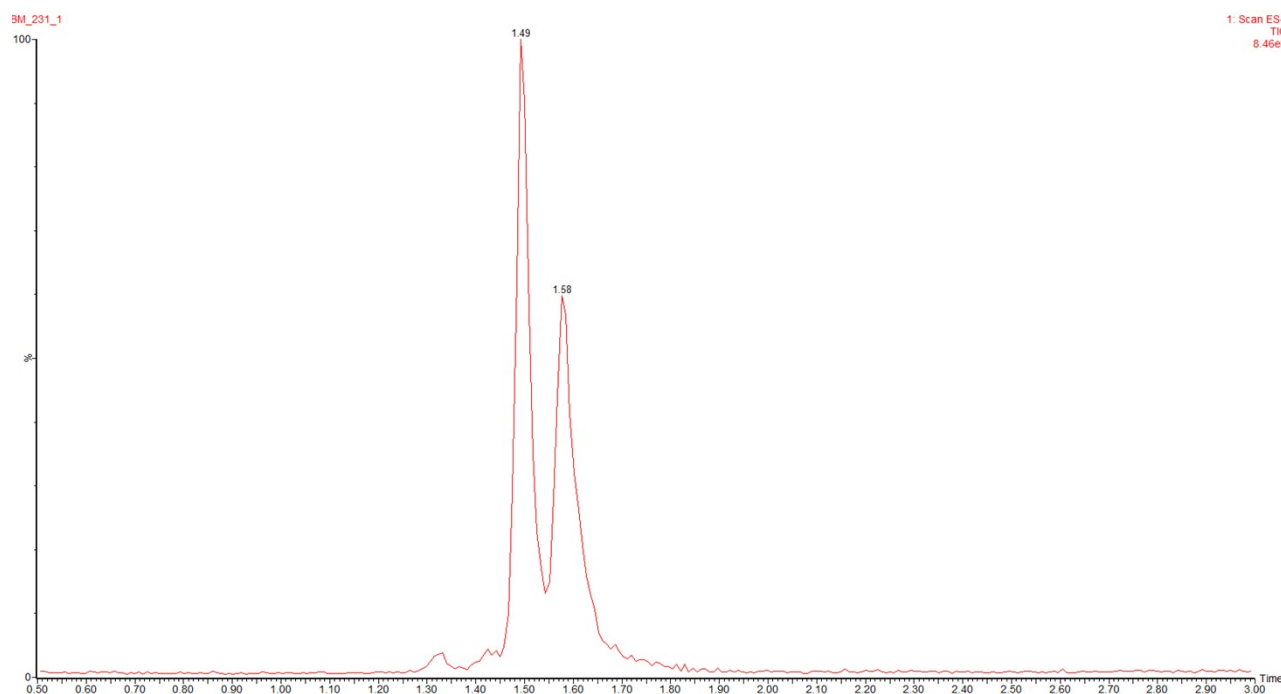

TIC of compound 16.

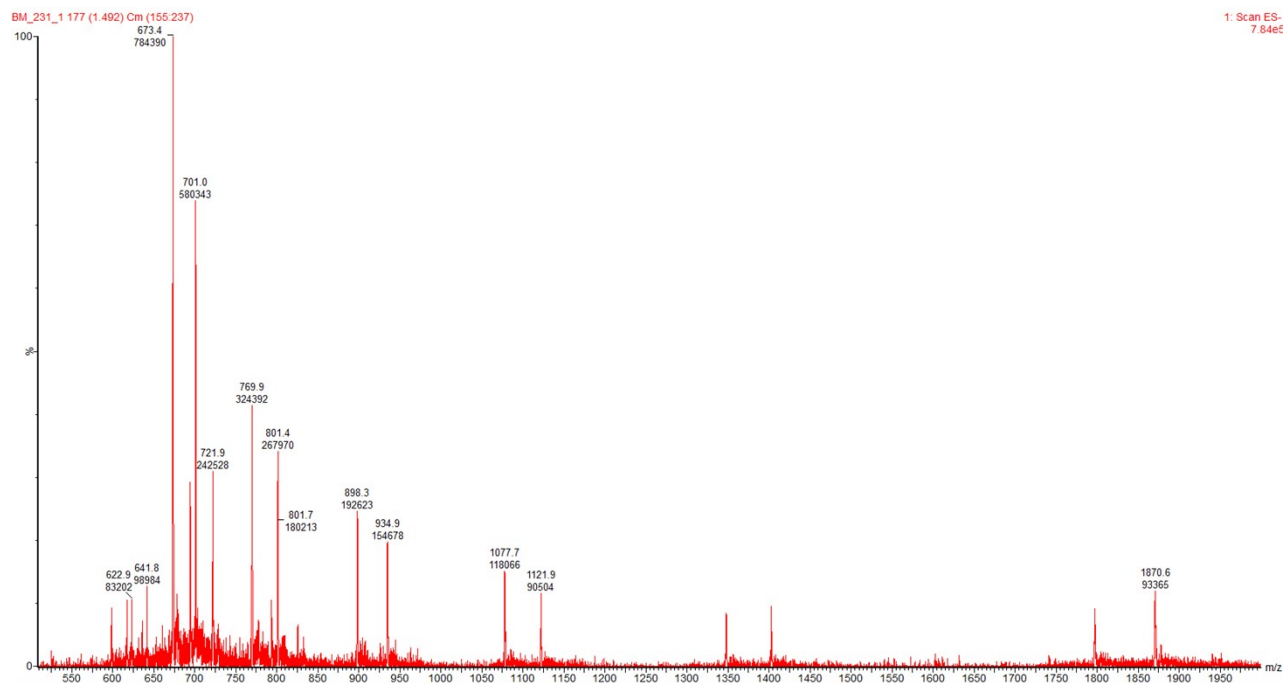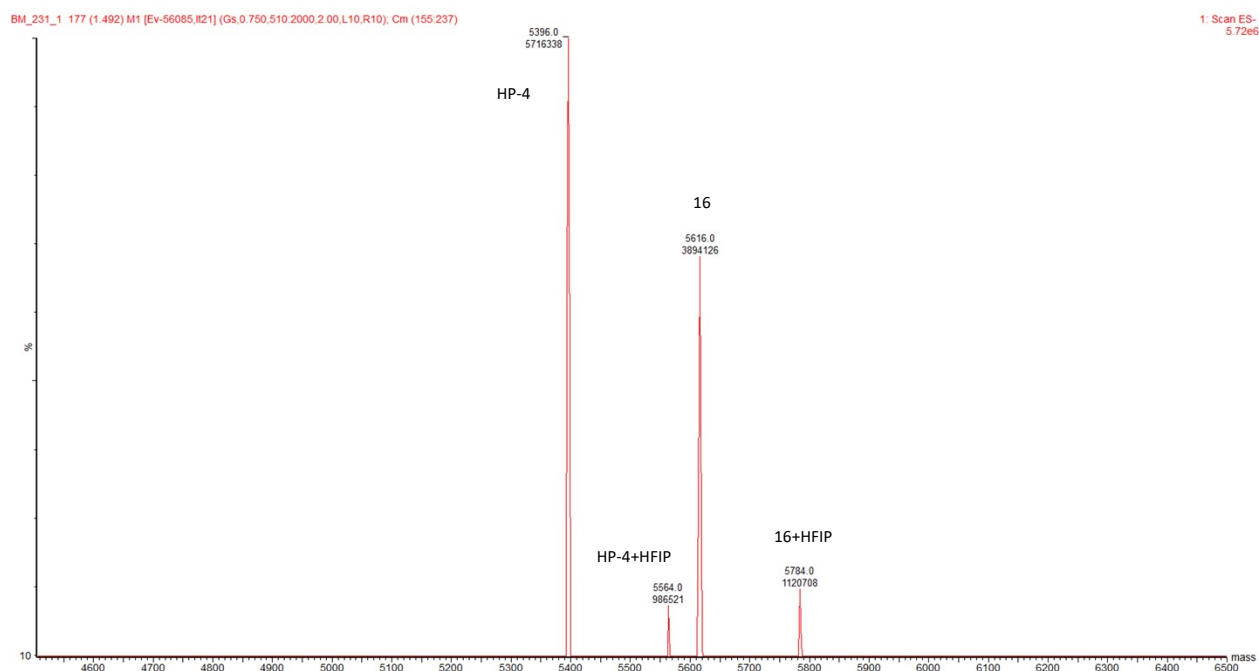

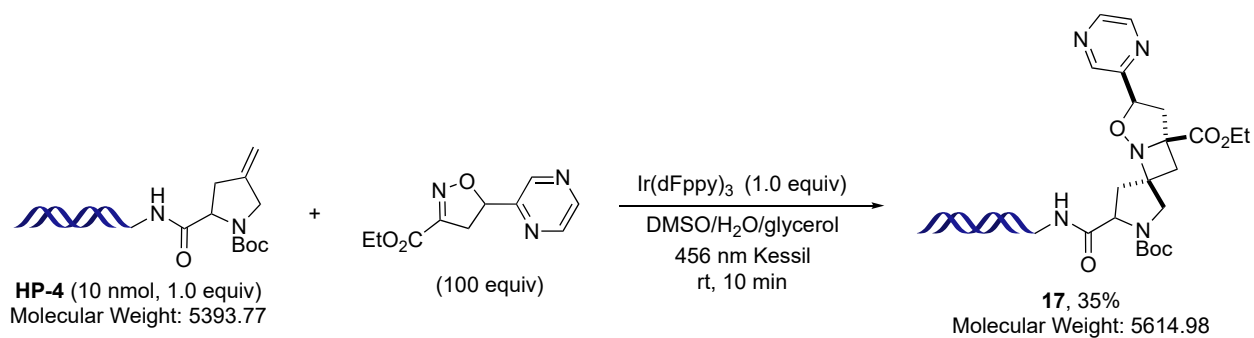

The title compound **17** was synthesized according to **GP-IV** from ethyl 5-(pyrazin-2-yl)-4,5-dihydroisoxazole-3-carboxylate and the DNA-tagged alkene **HP-4**. The product was formed with 35% conversion (60% recovered **HP-4**).

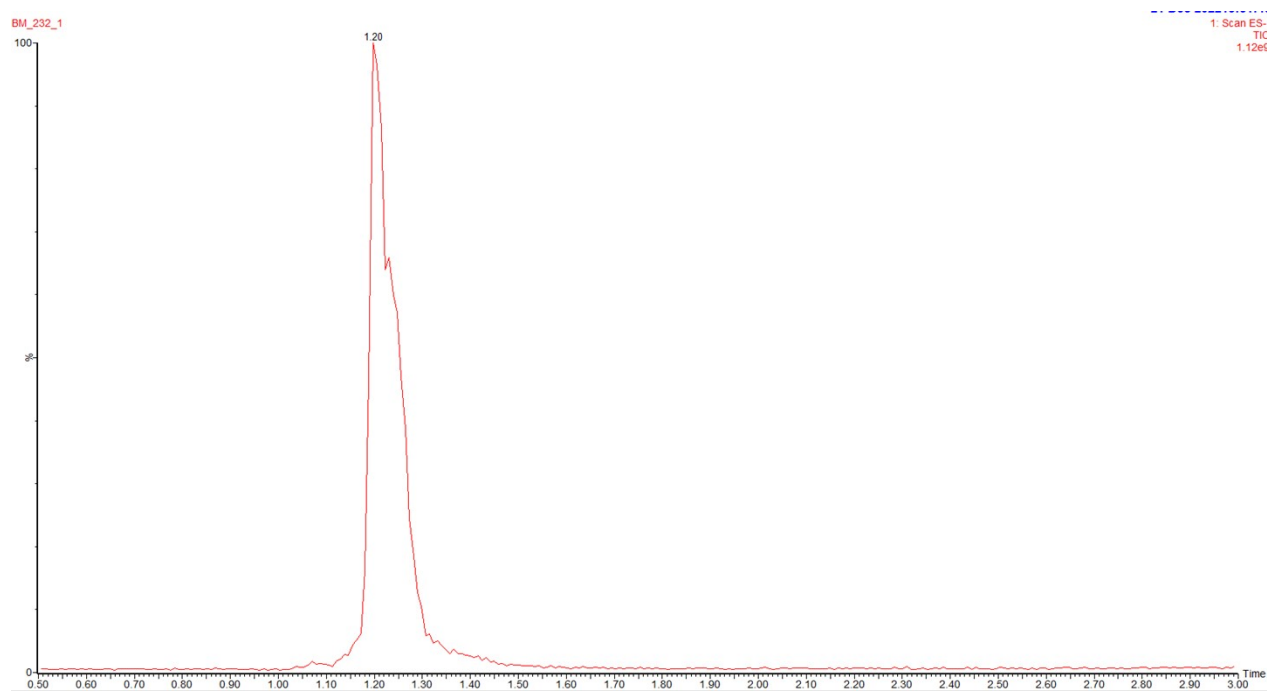

TIC of compound 17.

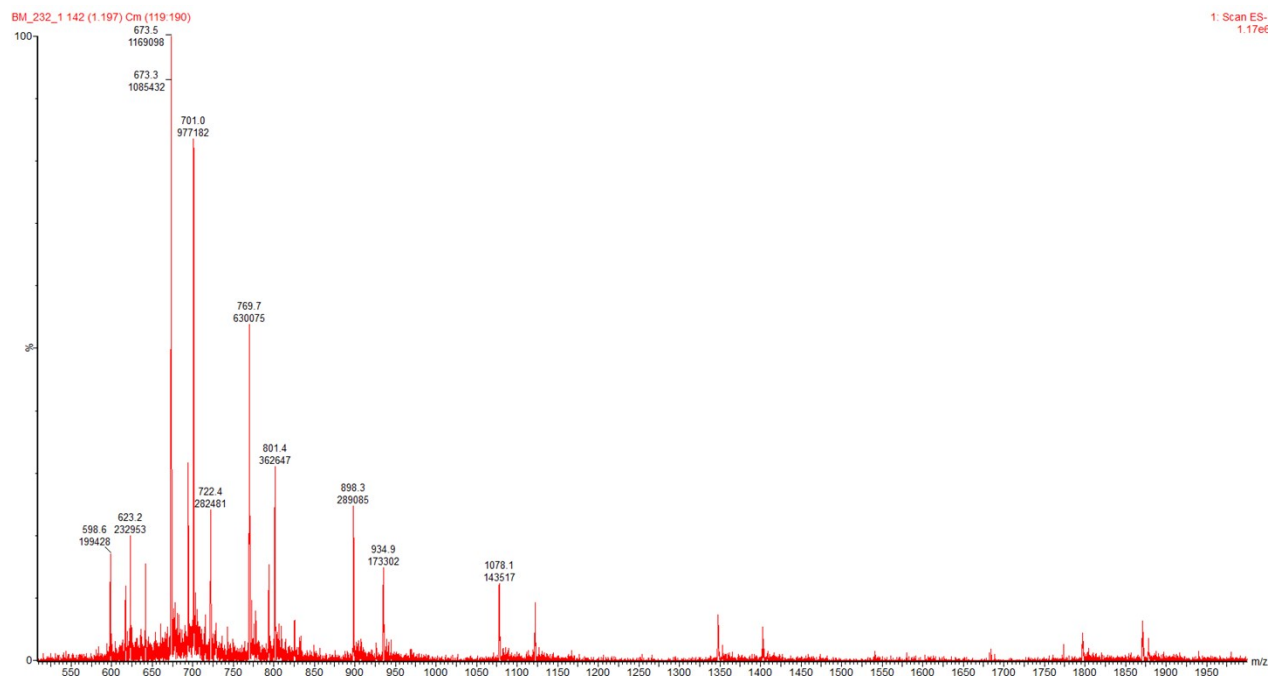

Raw MS of compound 17.

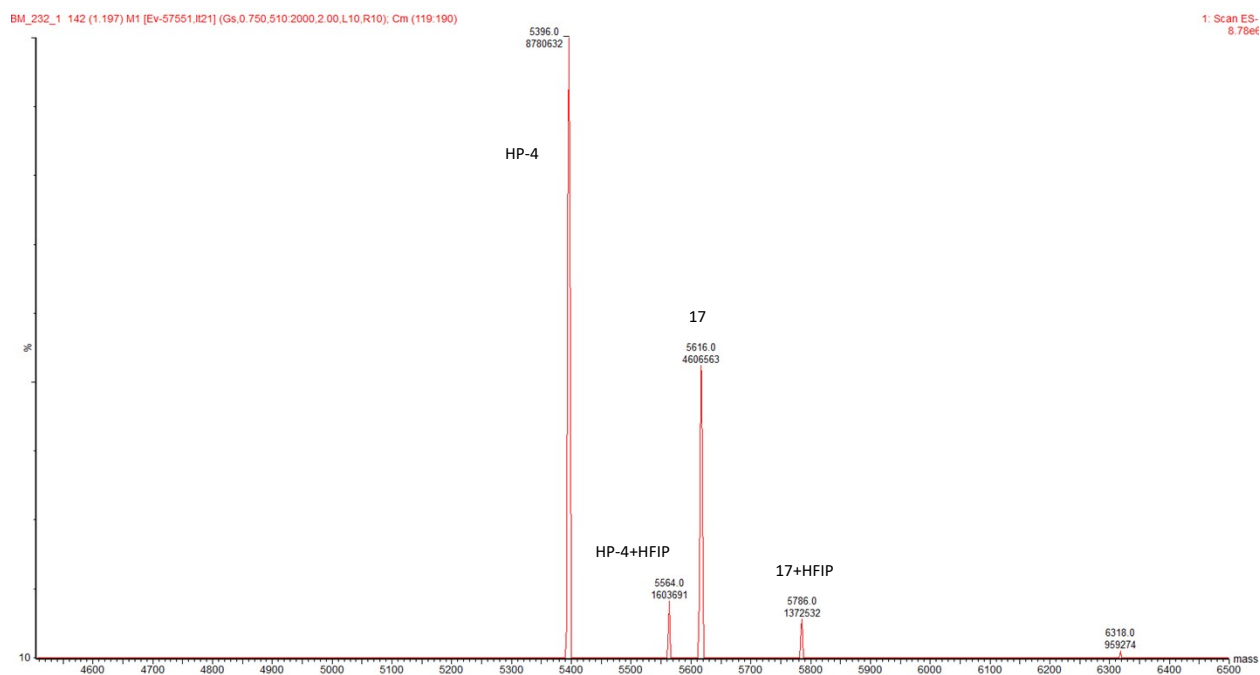

Deconvoluted MS of 17 (mass signals >10% of peak height).

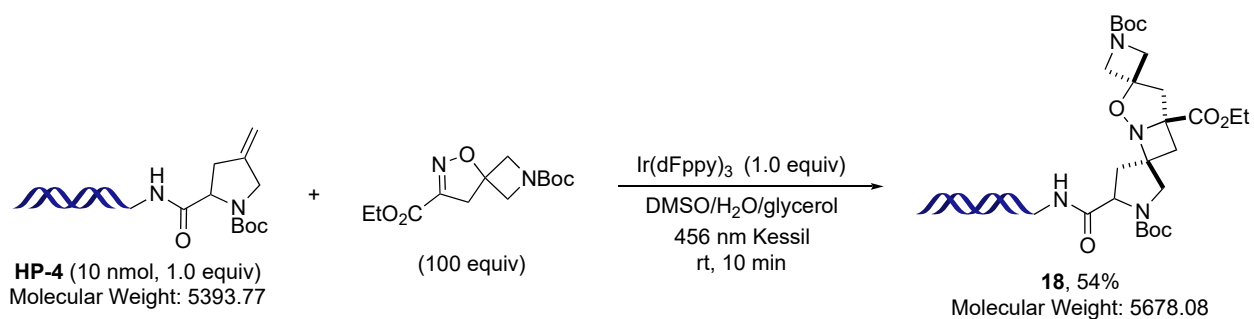

The title compound **18** was synthesized according to **GP-IV** from 8-(*tert*-butyl) 3-ethyl 1-oxa-2,8-diazaspiro[4.5]dec-2-ene-3,8-dicarboxylate and the DNA-tagged alkene **HP-4**. The product was formed with 54% conversion (46% recovered **HP-4**).

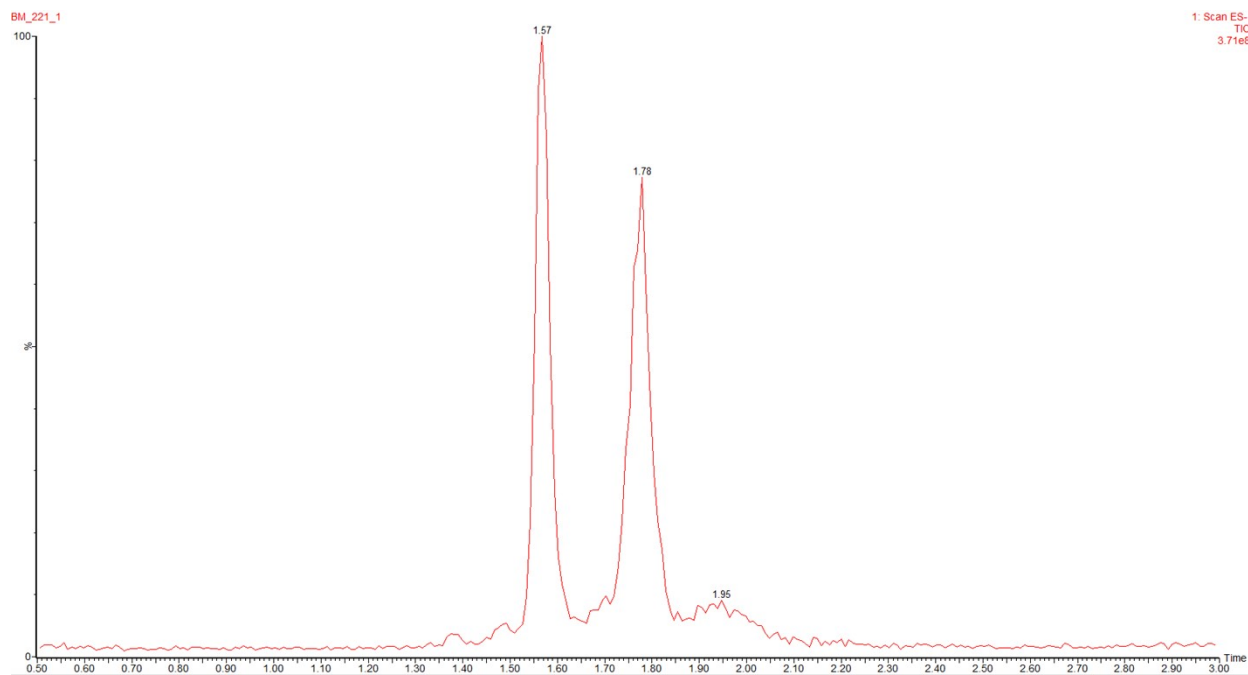

TIC of compound 18.

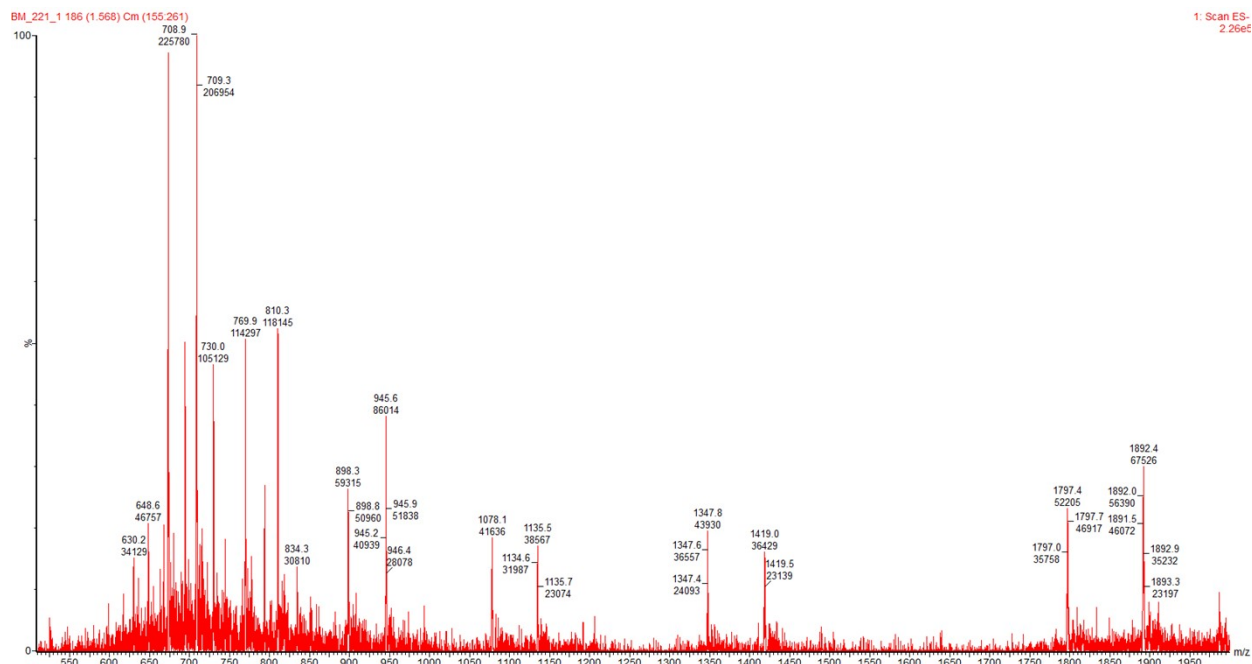

Raw MS of compound 18.

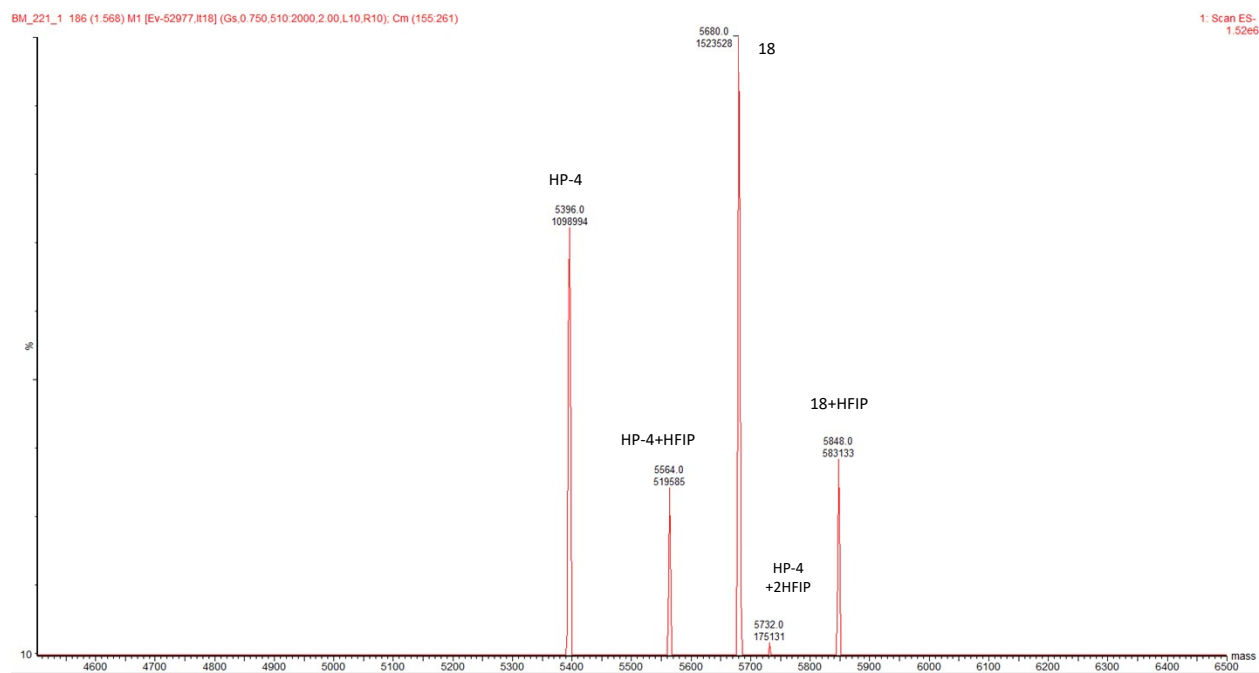

Deconvoluted MS of 18 (mass signals >10% of peak height).

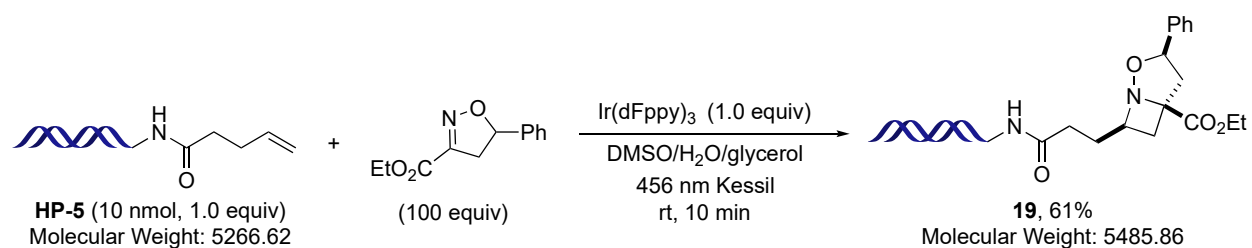

The title compound **19** was synthesized according to **GP-IV** from ethyl 5-phenyl-4,5-dihydroisoxazole-3-carboxylate and the DNA-tagged alkene **HP-5**. The product was formed with 61% conversion (39% recovered **HP-5**).

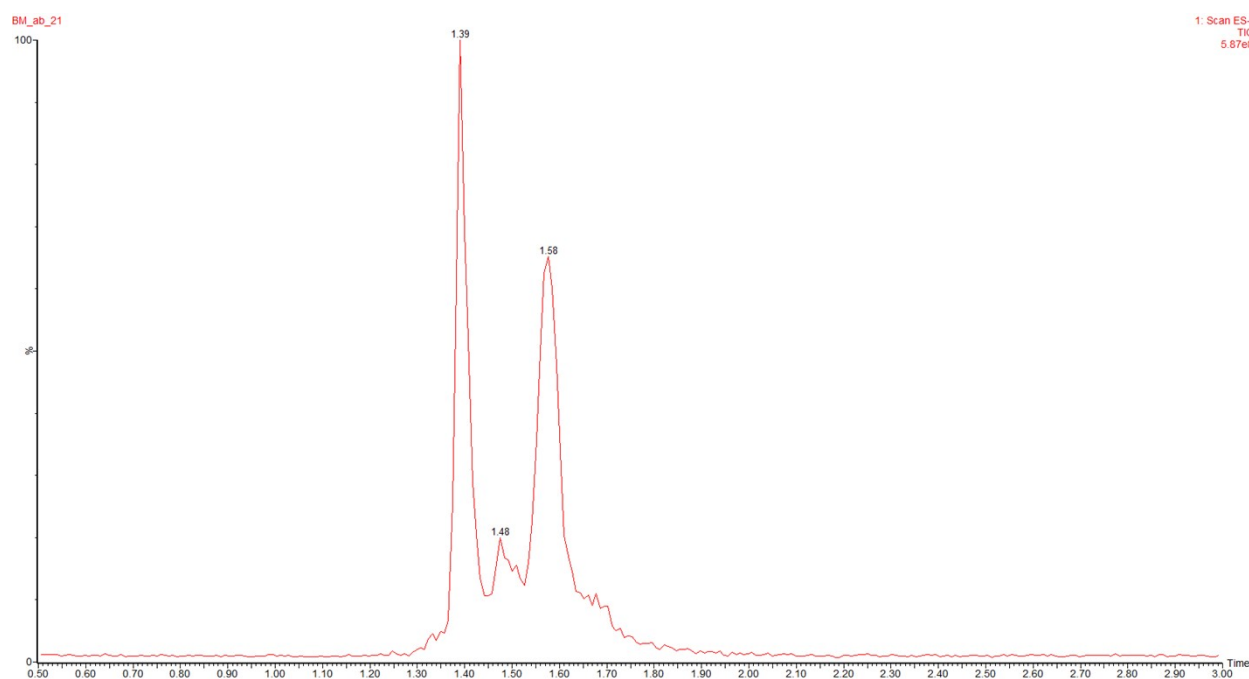

TIC of compound 19.

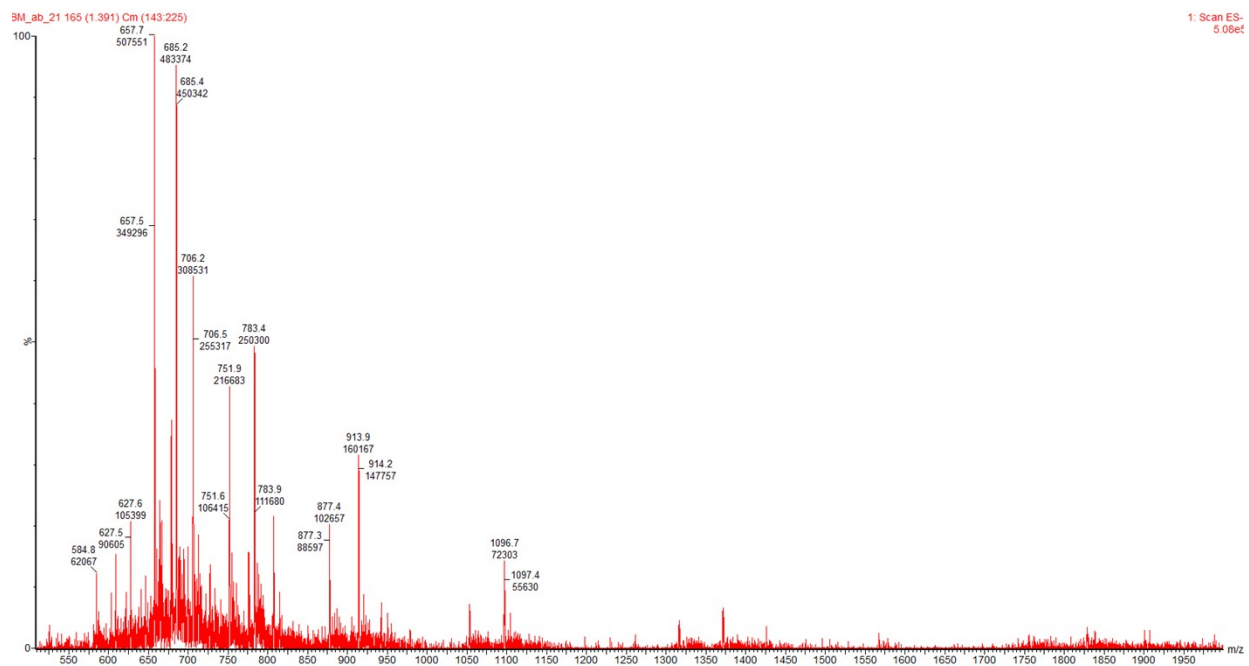

Raw MS of compound 19.

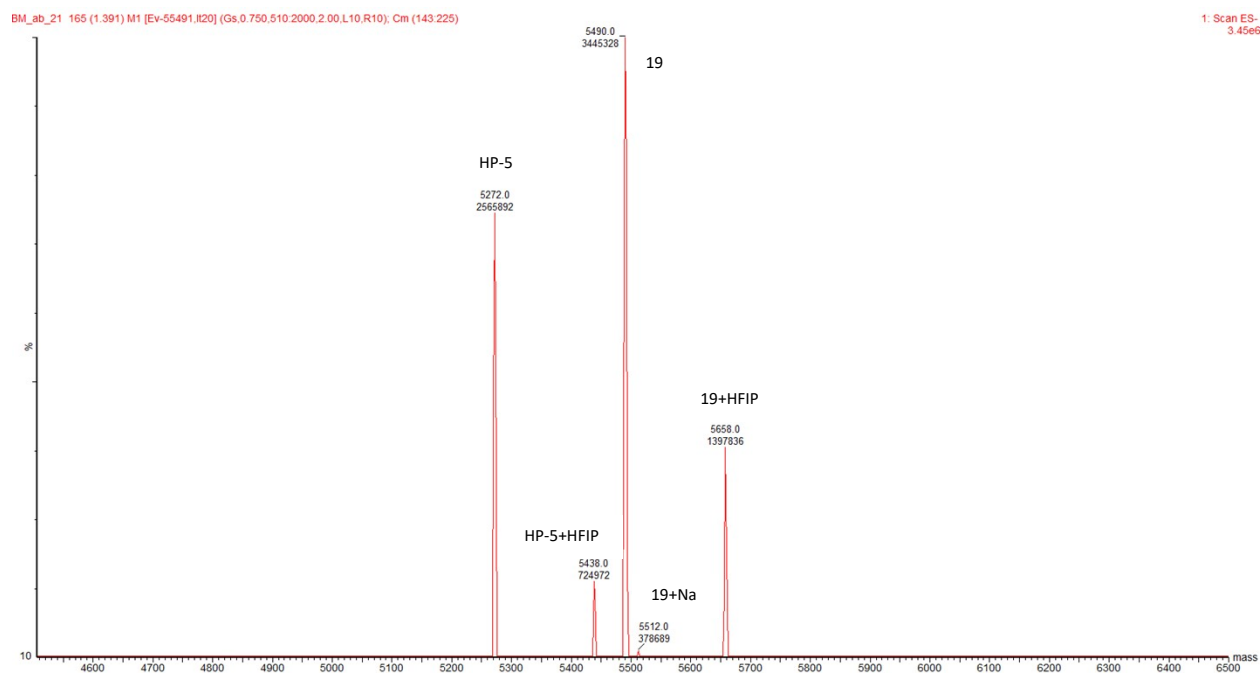

Deconvoluted MS of 19 (mass signals >10% of peak height).

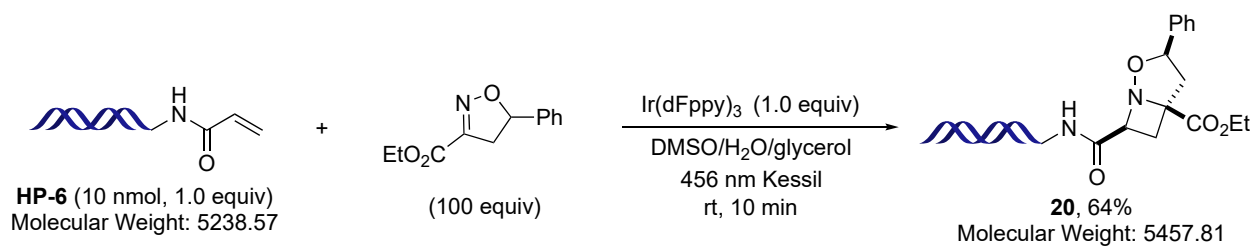

The title compound **20** was synthesized according to **GP-IV** from ethyl 5-phenyl-4,5-dihydroisoxazole-3-carboxylate and the DNA-tagged alkene **HP-6**. The product was formed with 64% conversion (9% recovered **HP-6**; 8% double addition product).

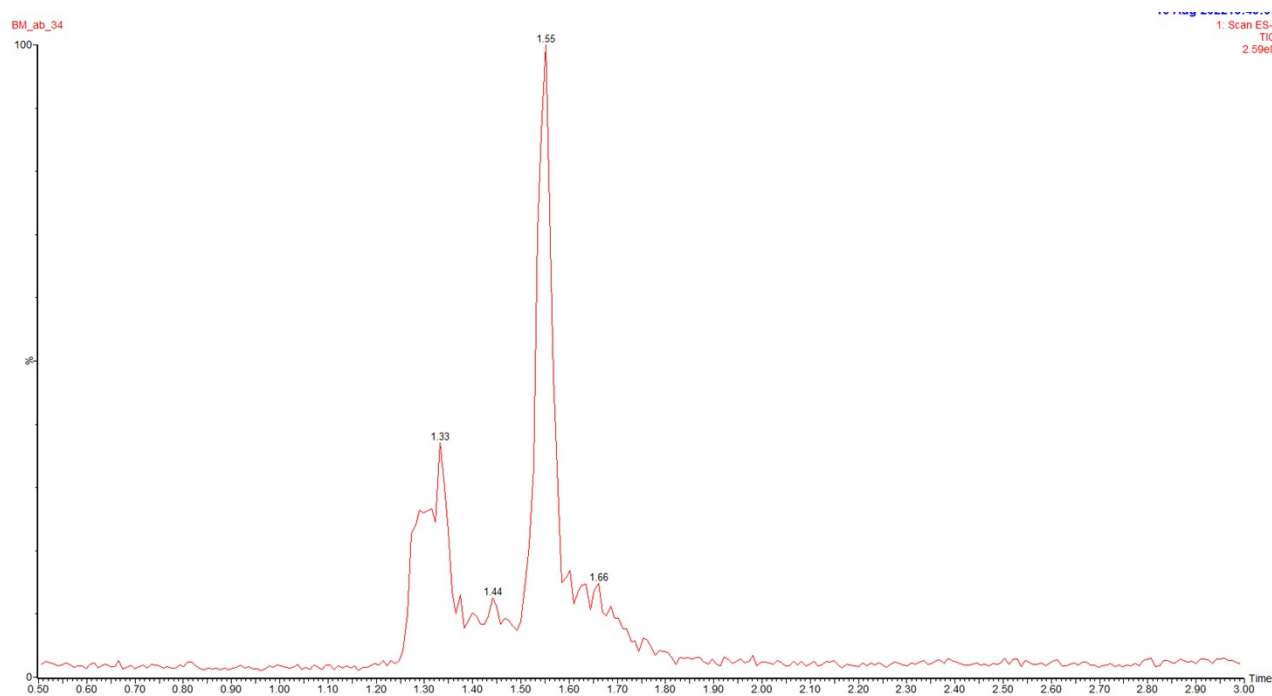

TIC of compound 20.

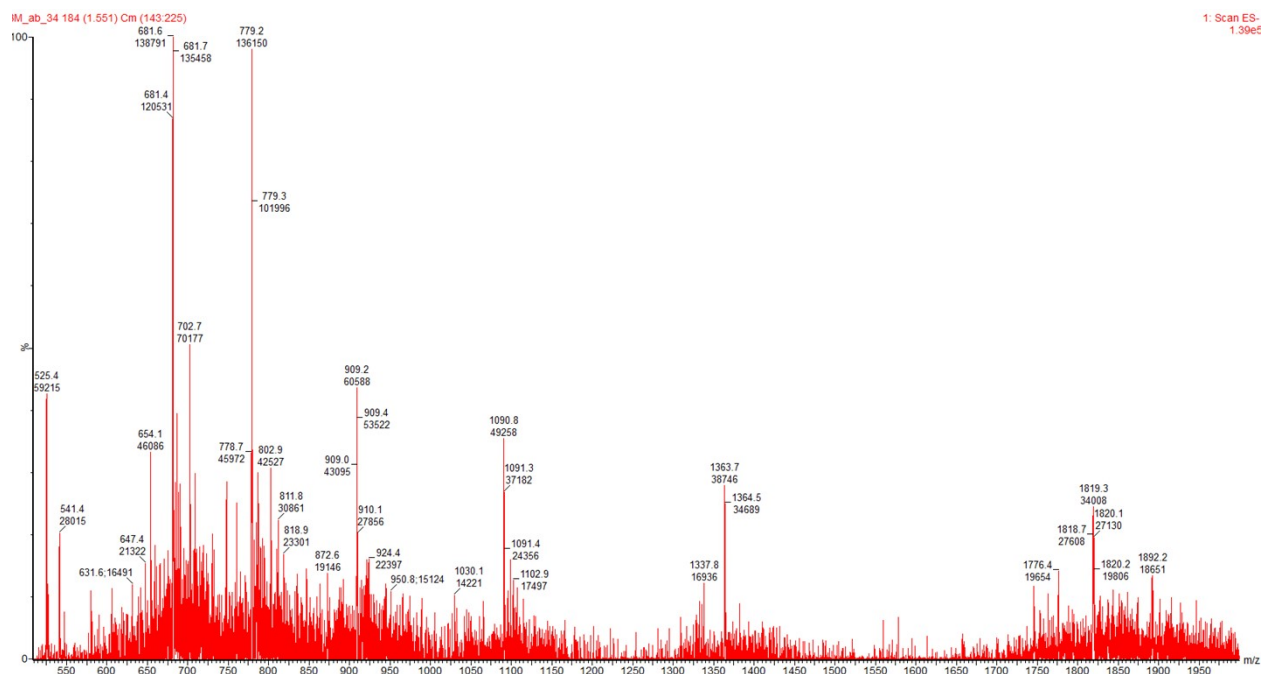

Raw MS of compound 20.

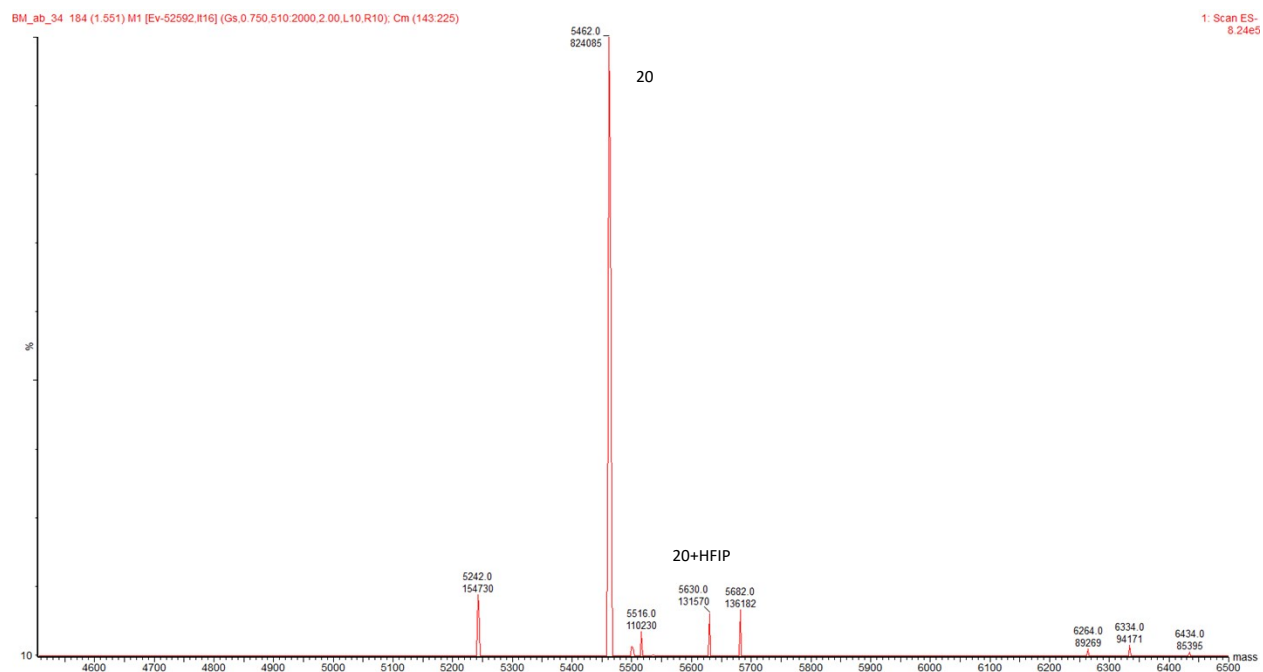

Deconvoluted MS of 20 (mass signals >10% of peak height).

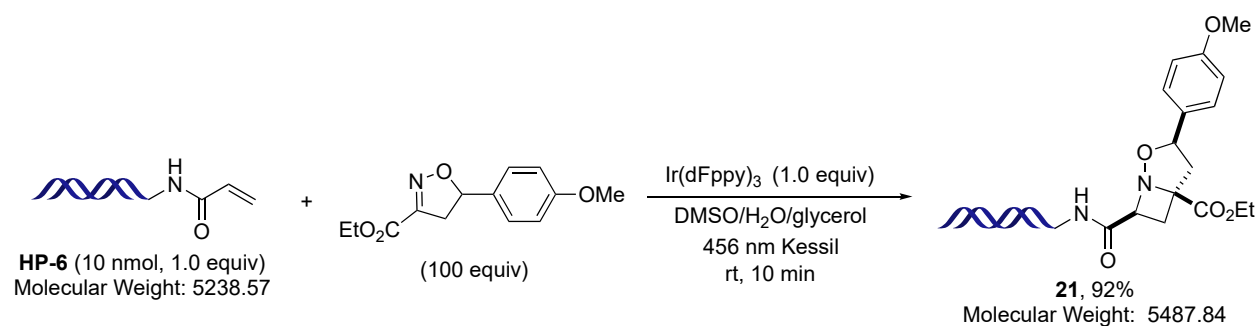

The title compound **21** was synthesized according to **GP-IV** from ethyl 5-(4-methoxyphenyl)-4,5-dihydroisoxazole-3-carboxylate and the DNA-tagged alkene **HP-6**. The product was formed with 92% conversion.

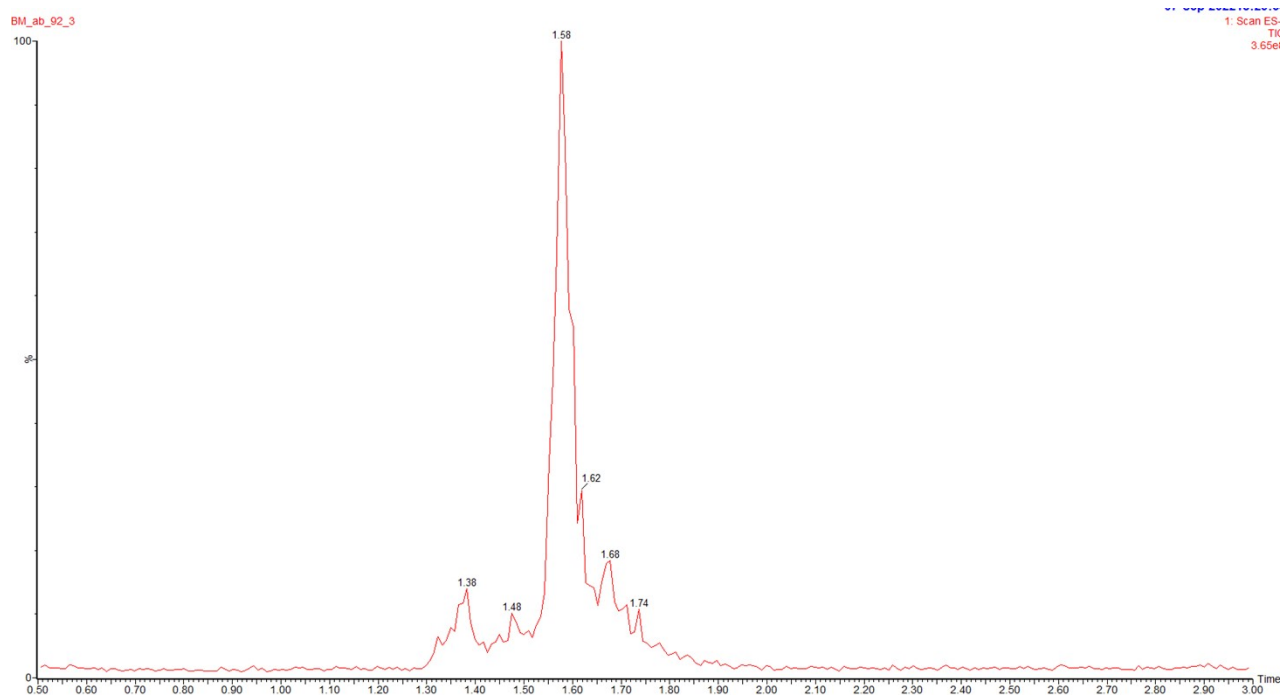

TIC of compound 21.

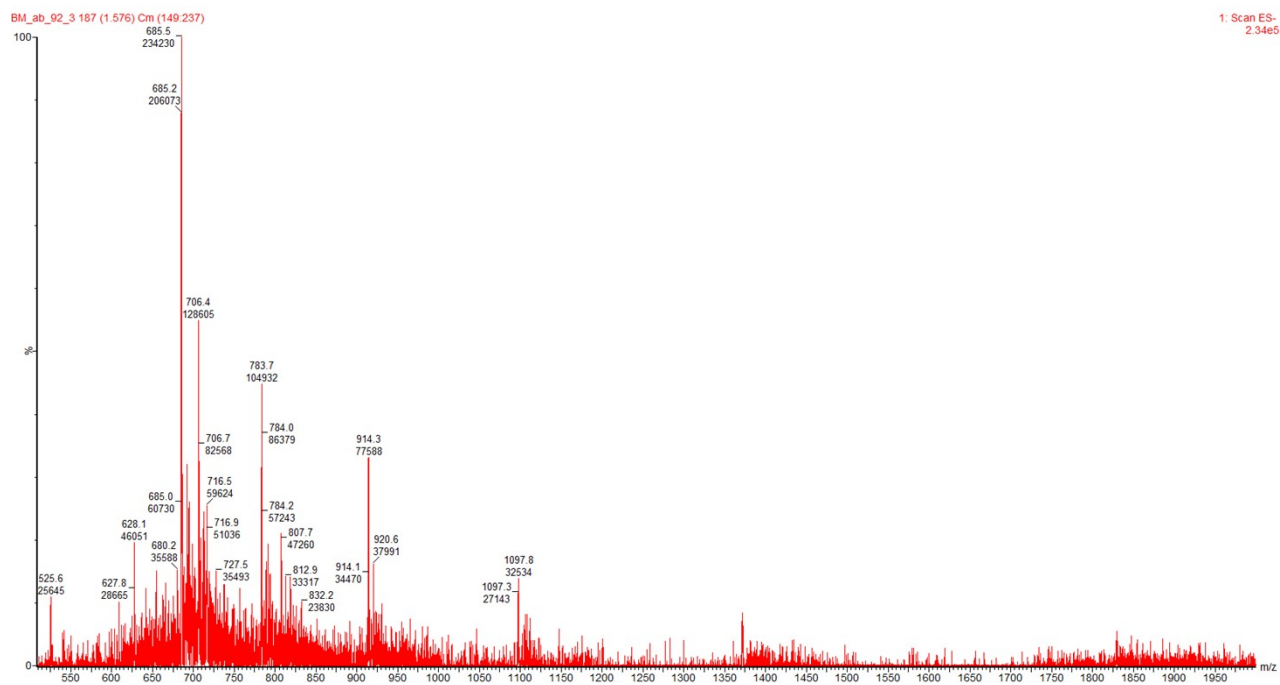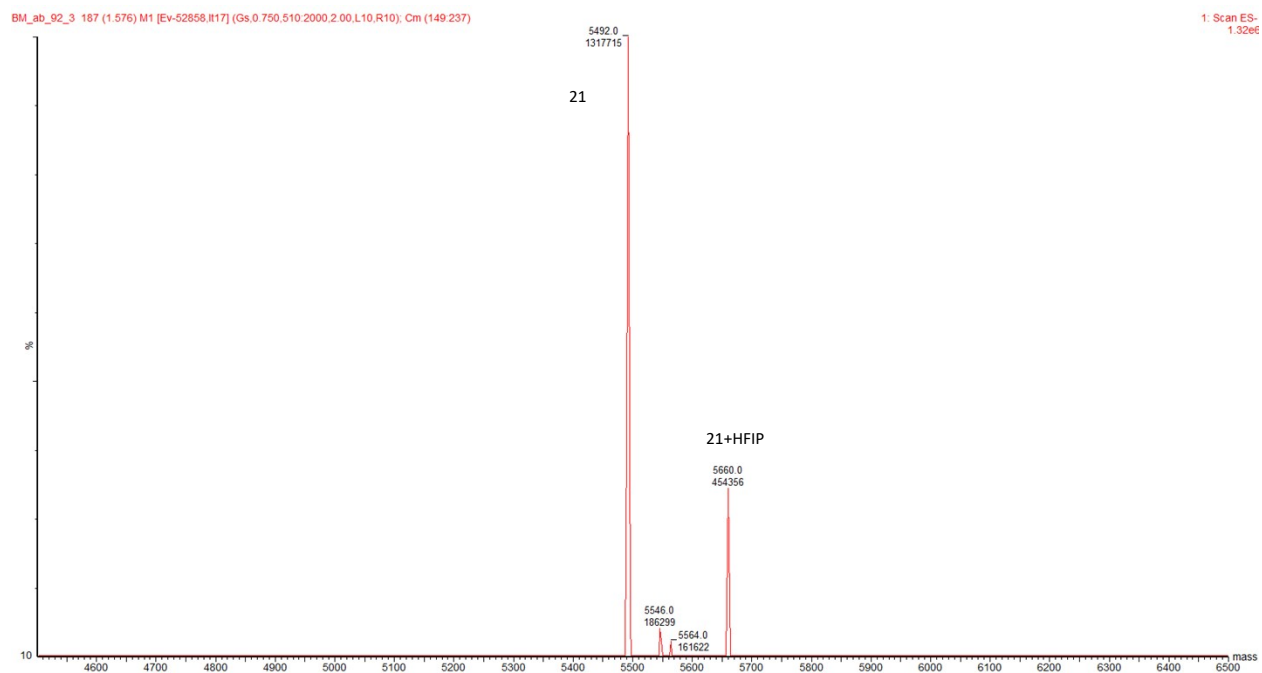

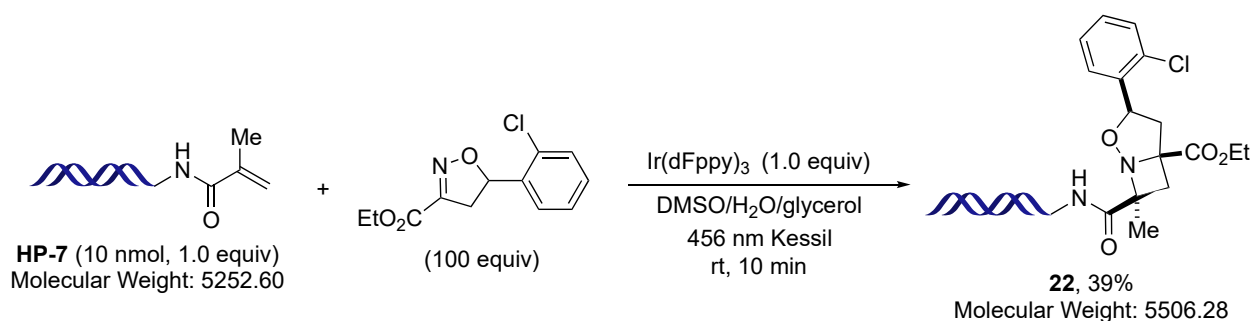

The title compound **22** was synthesized according to **GP-IV** from ethyl 5-(2-chlorophenyl)-4,5-dihydroisoxazole-3-carboxylate and the DNA-tagged alkene **HP-7**. The product was formed with 39% conversion (43% recovered **HP-7**).

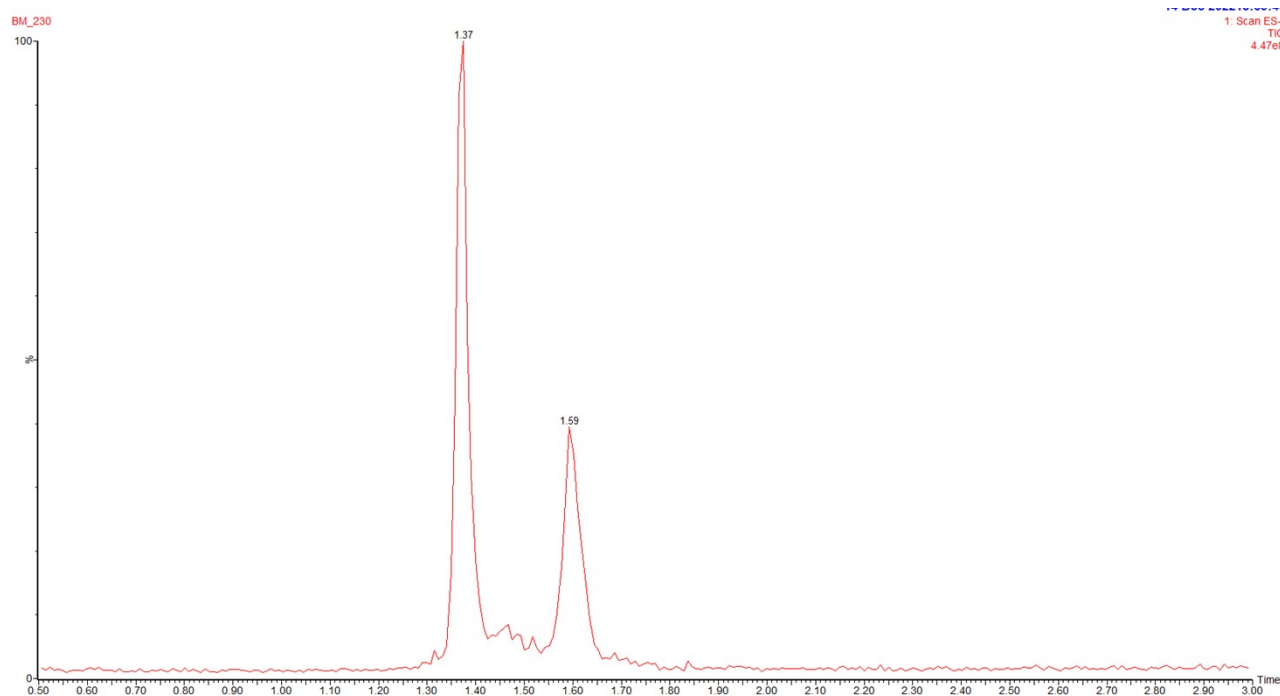

TIC of compound 22.

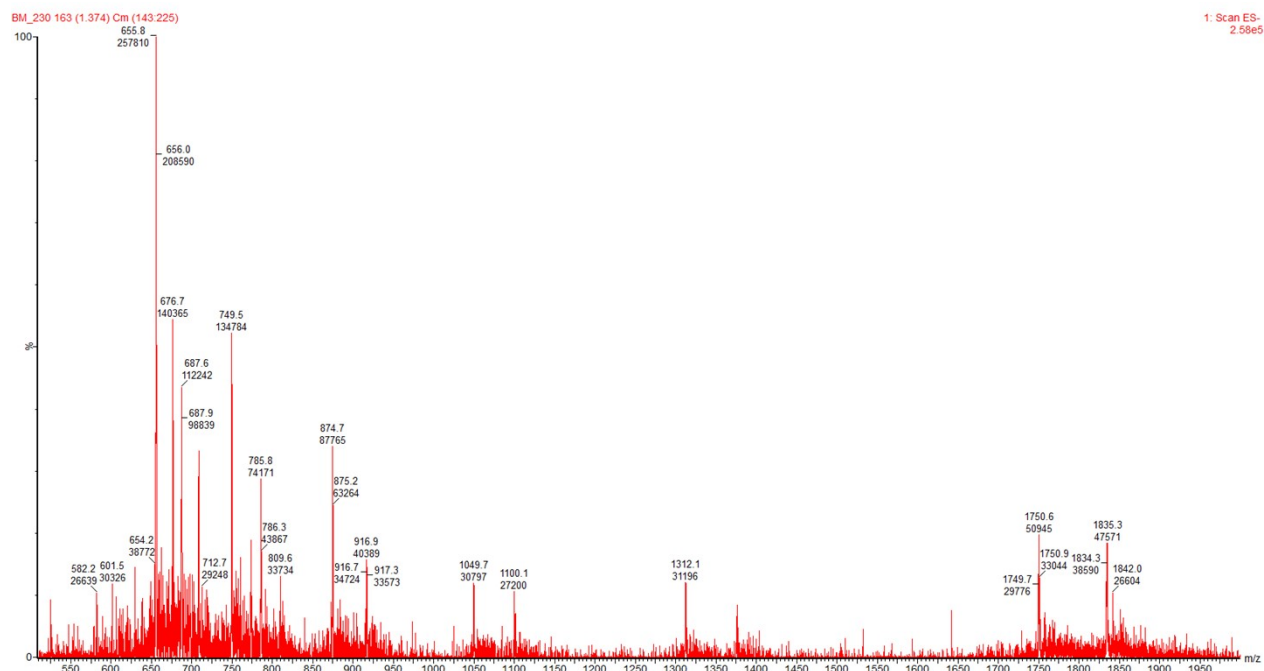

Raw MS of compound 22.

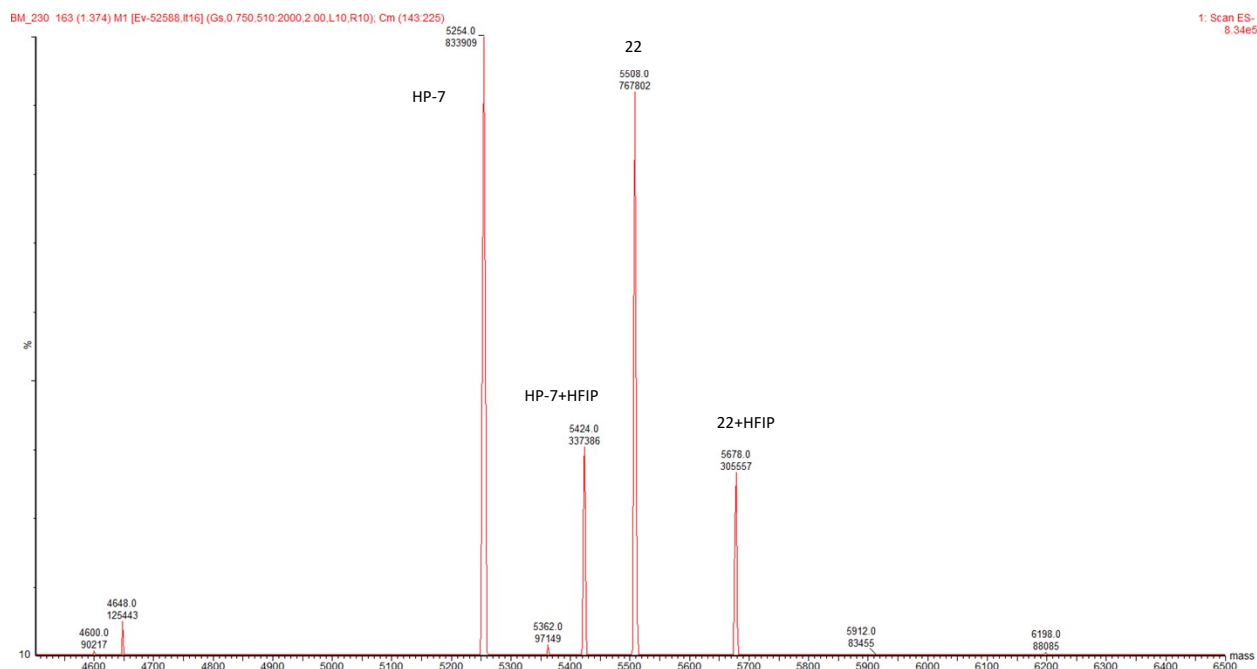

Deconvoluted MS of 22 (mass signals >10% of peak height).

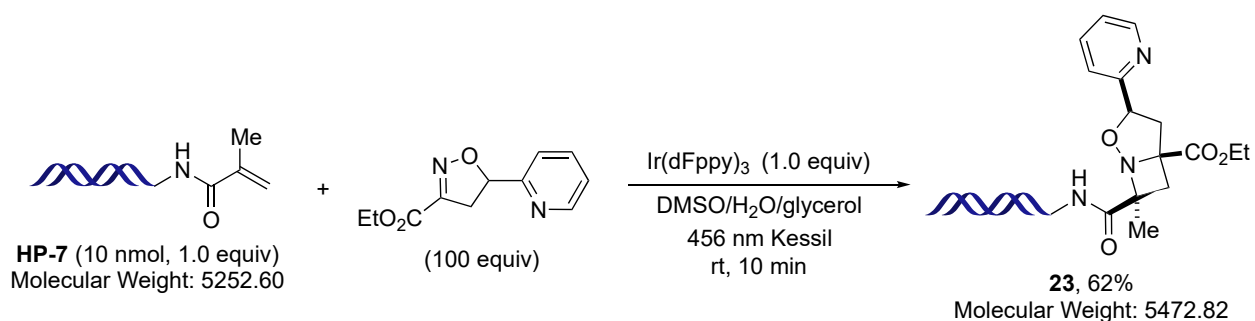

The title compound **23** was synthesized according to **GP-IV** from ethyl 5-(pyridin-2-yl)-4,5-dihydroisoxazole-3-carboxylate and the DNA-tagged alkene **HP-7**. The product was formed with 62% conversion (38% recovered **HP-7**).

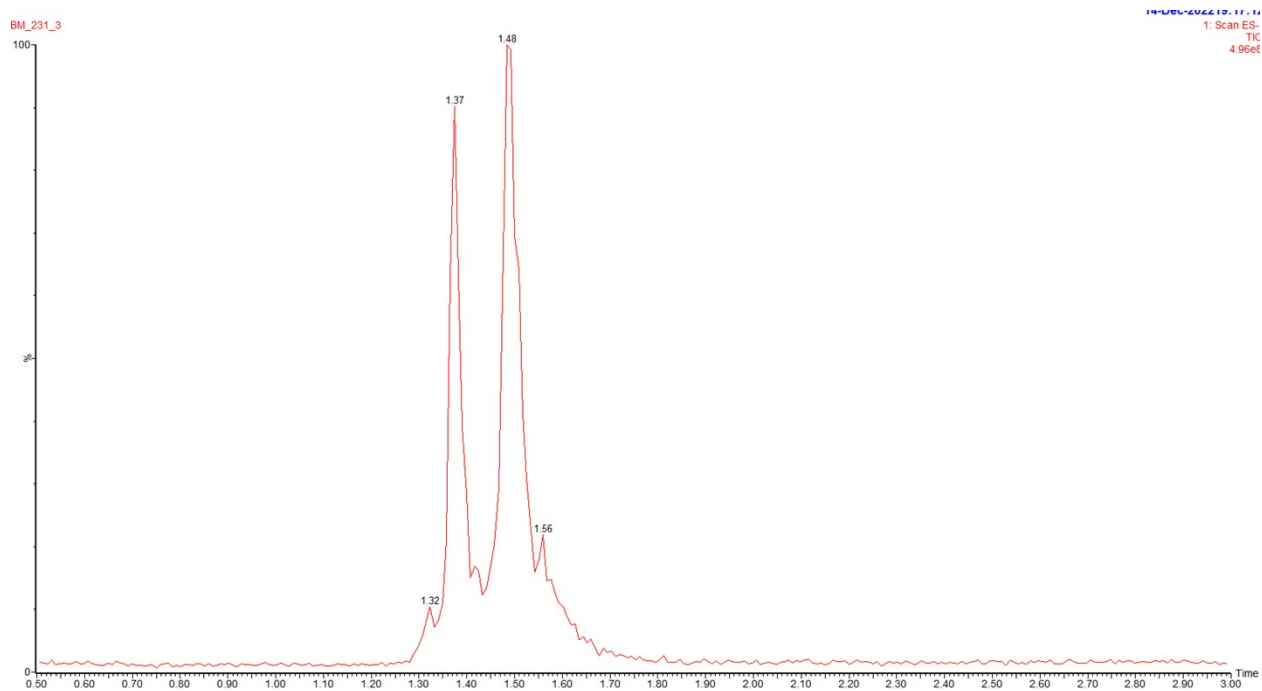

TIC of compound 23.

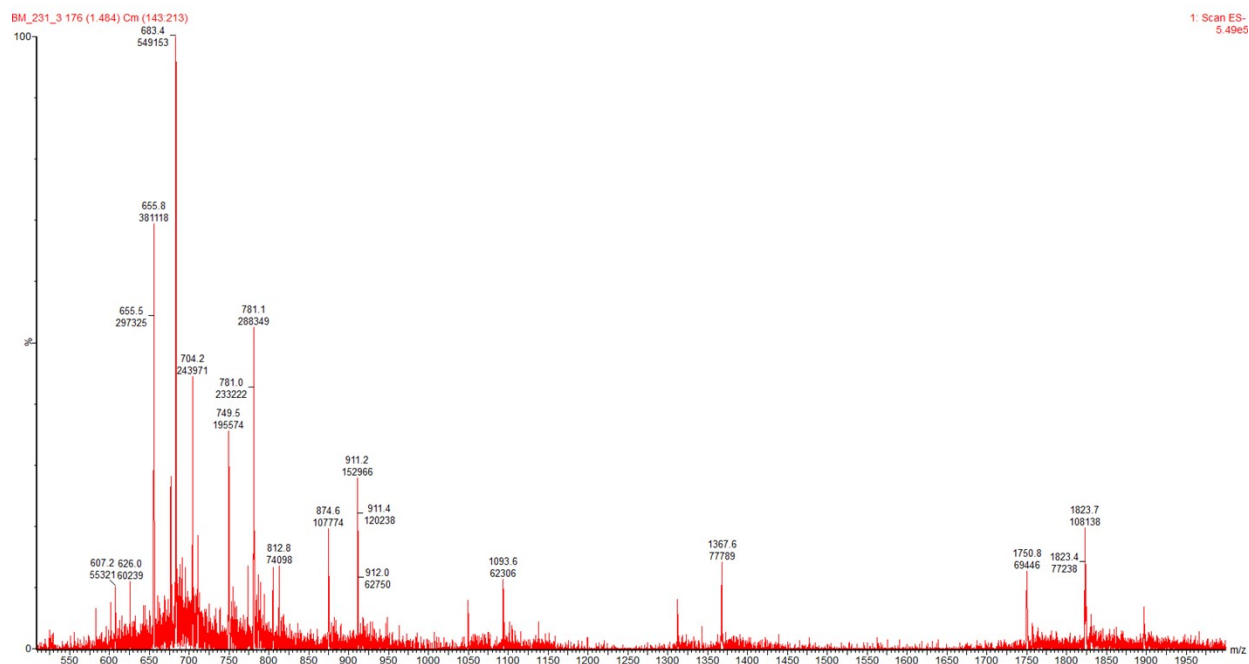

Raw MS of compound 23.

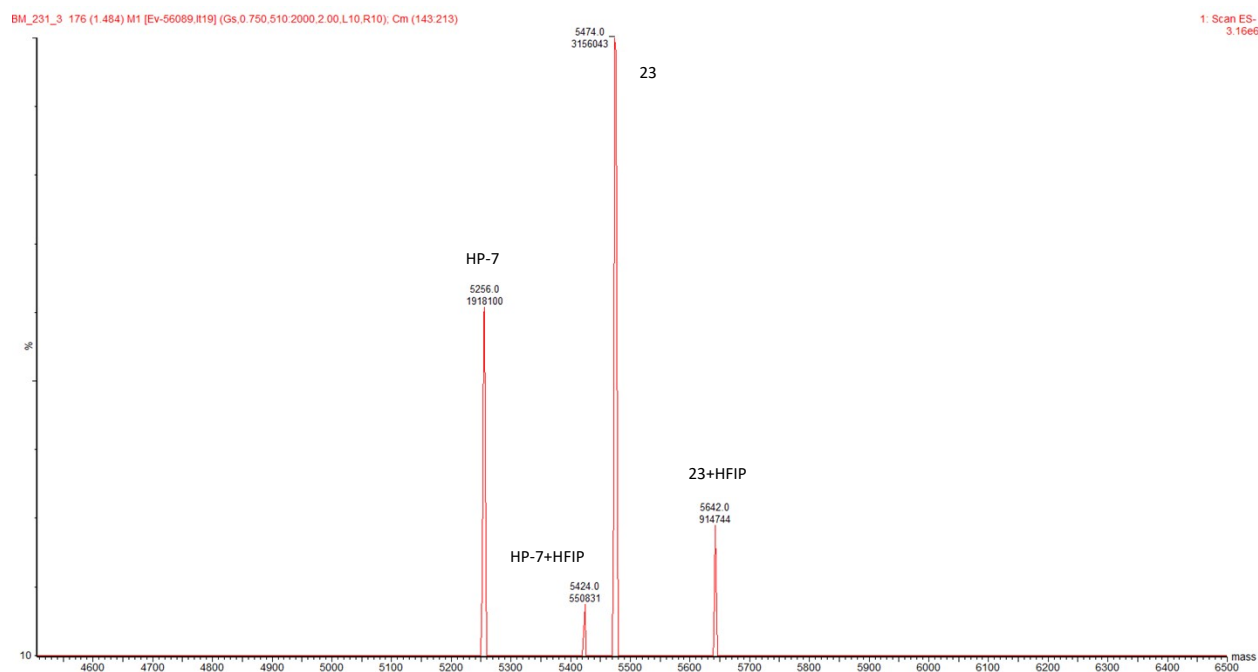

Deconvoluted MS of 23 (mass signals >10% of peak height).

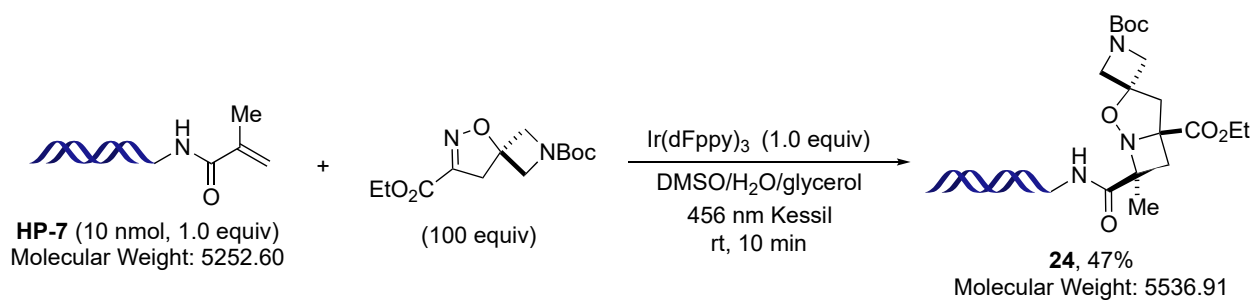

The title compound **24** was synthesized according to **GP-IV** from 2-(*tert*-butyl) 7-ethyl 5-oxa-2,6-diazaspiro[3.4]oct-6-ene-2,7-dicarboxylate and the DNA-tagged alkene **HP-7**. The product was formed with 47% conversion (53% recovered **HP-7**).

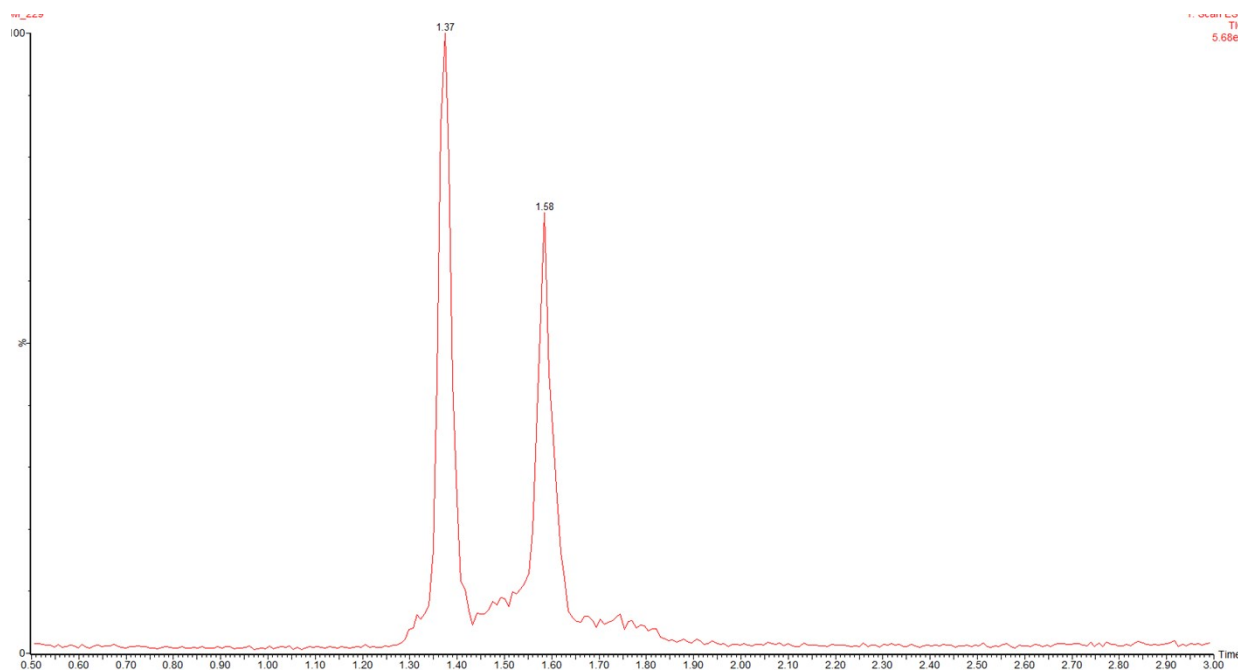

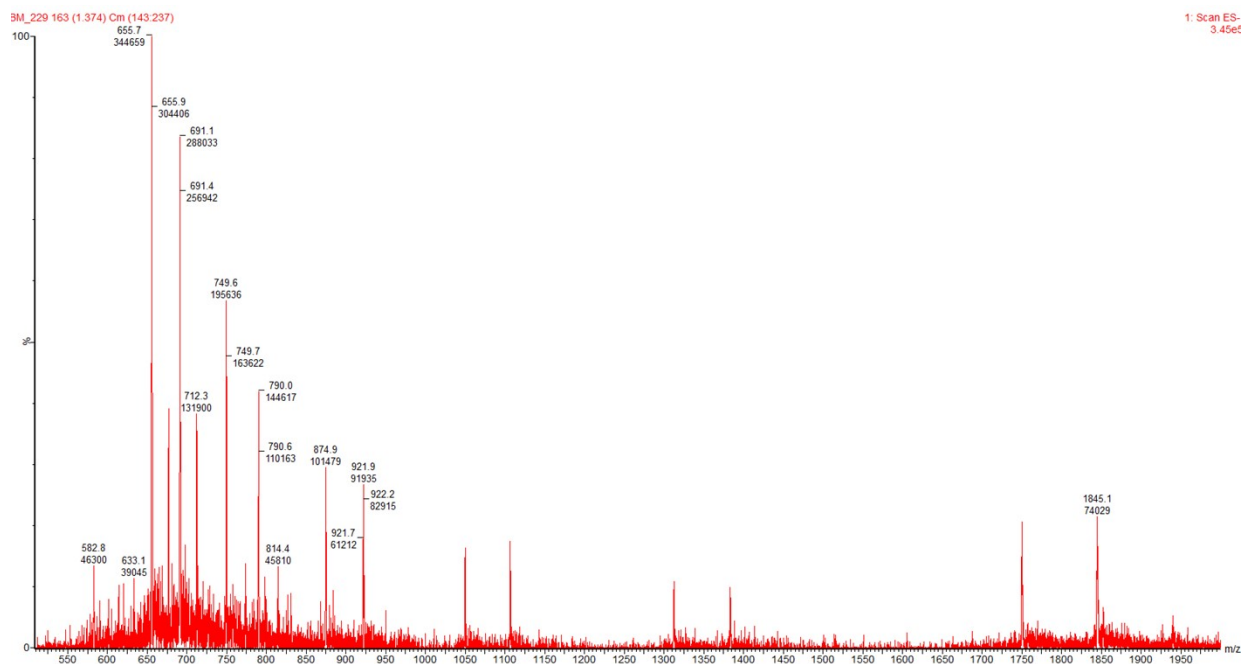

Raw MS of compound 24.

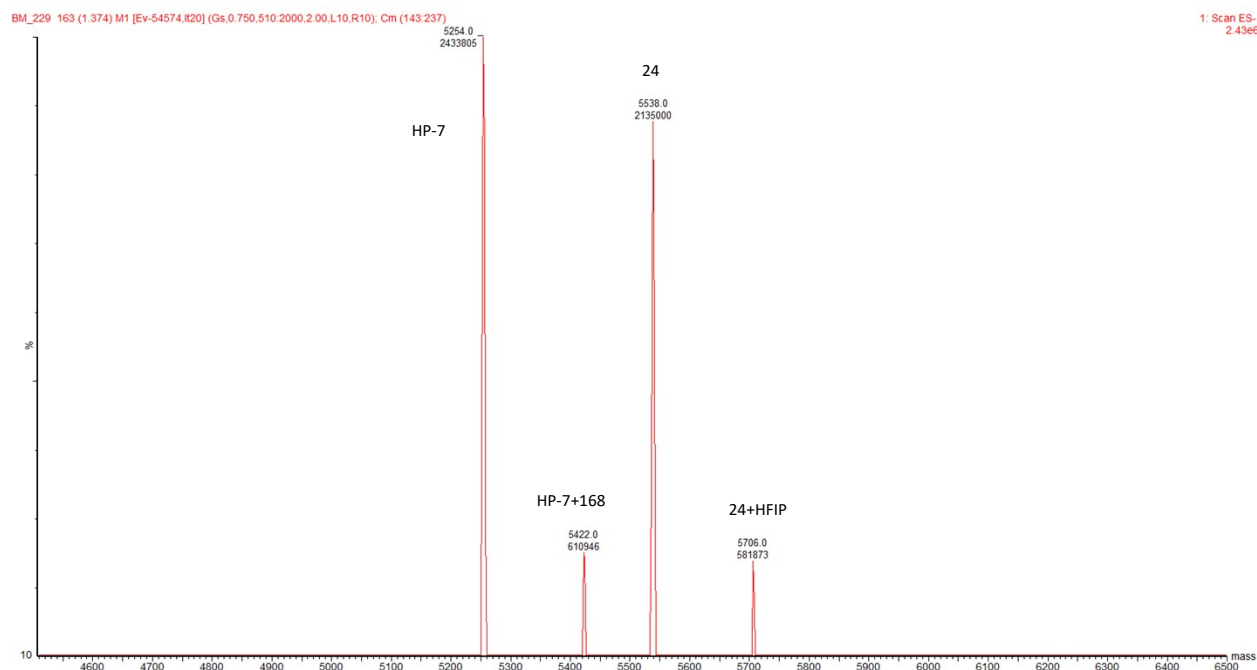

Deconvoluted MS of 24 (mass signals >10% of peak height).

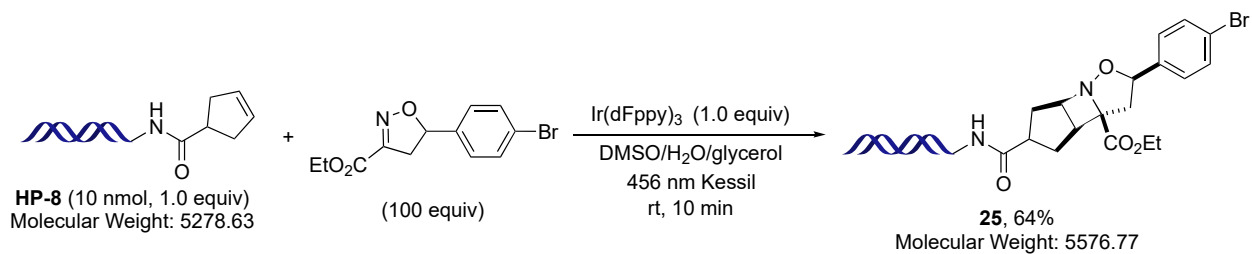

The title compound **25** was synthesized according to **GP-IV** from ethyl 5-(4-bromophenyl)-4,5-dihydroisoxazole-3-carboxylate and the DNA-tagged alkene **HP-8**. The product was formed with 64% conversion (31% recovered **HP-8**; 5% double addition product).

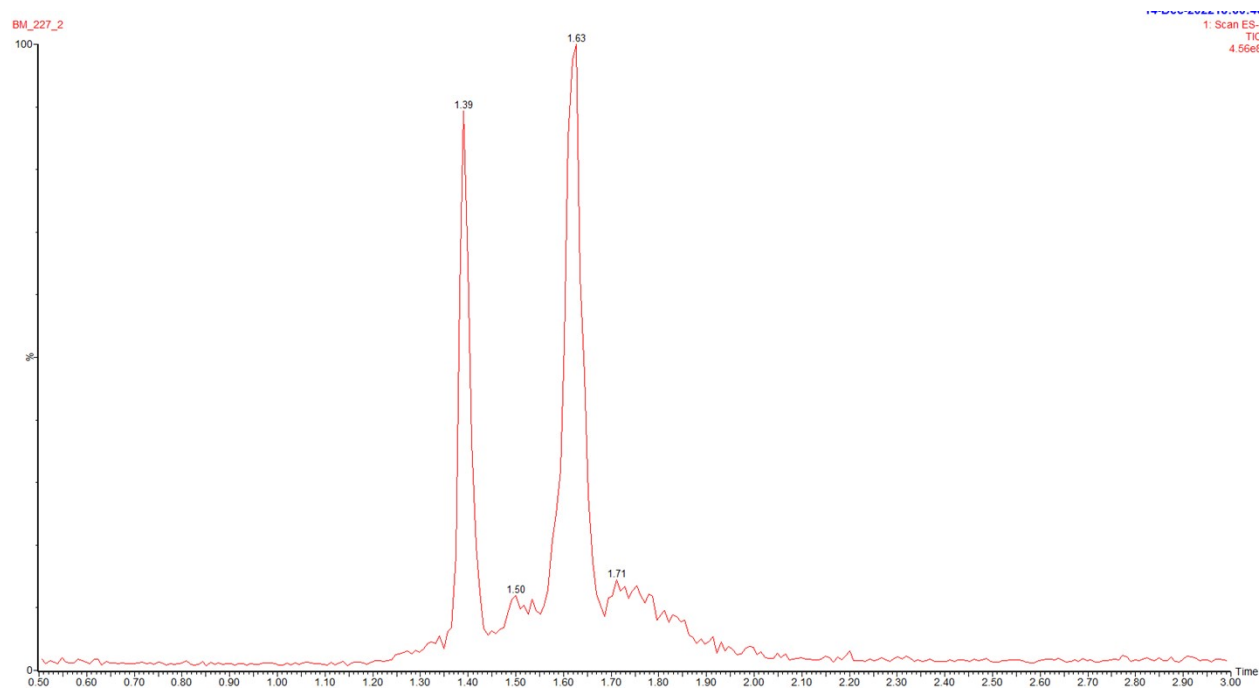

TIC of compound 25.

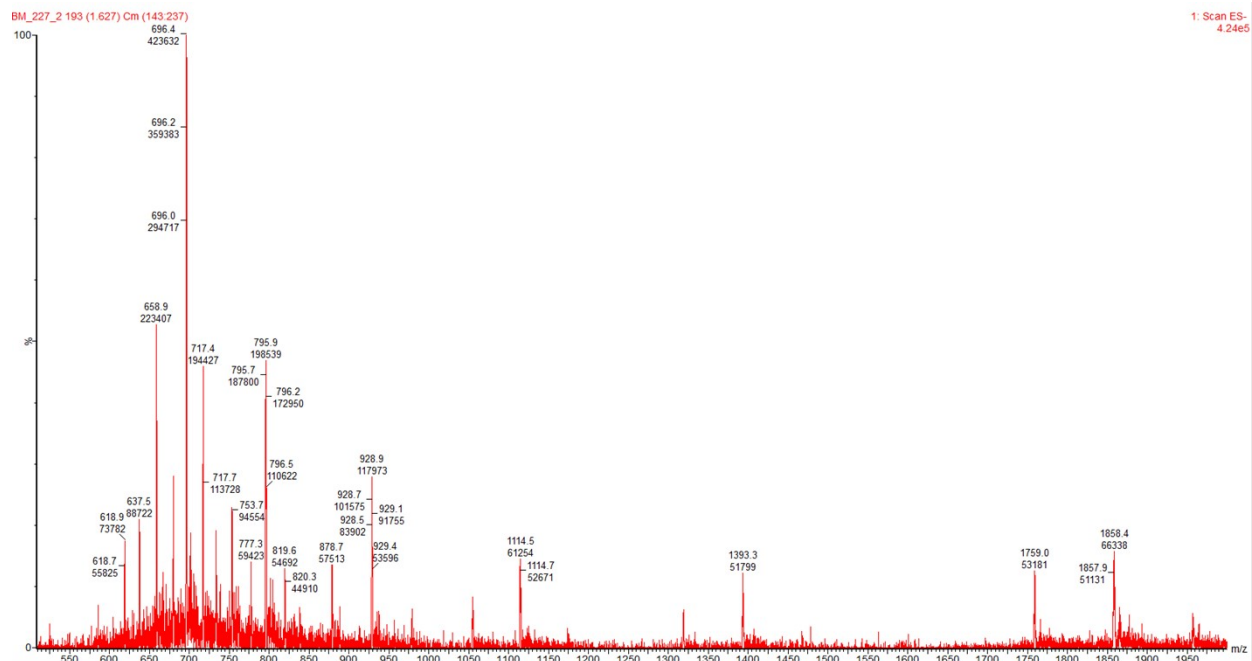

Raw MS of compound 25.

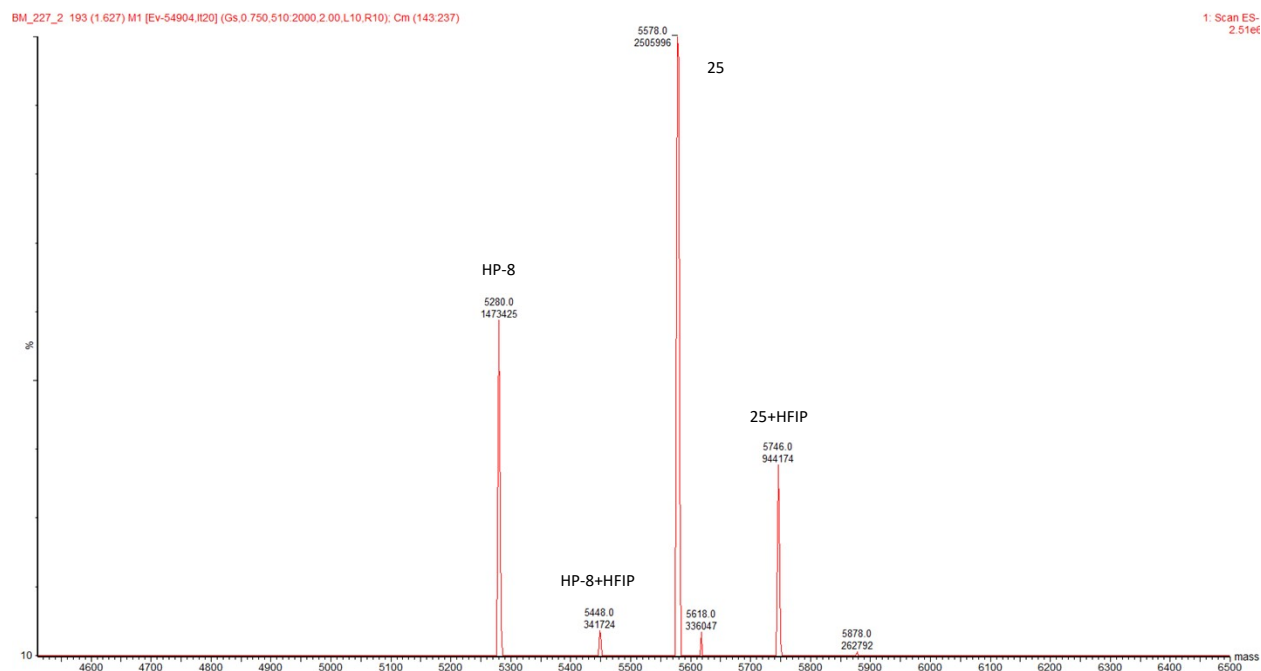

Deconvoluted MS of 25 (mass signals >10% of peak height).

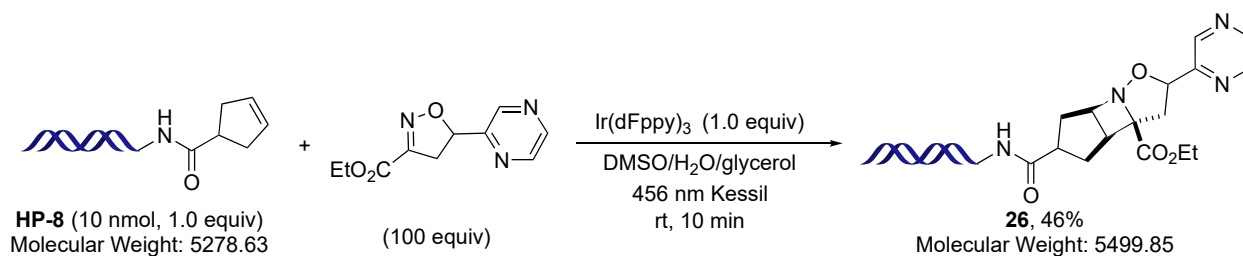

The title compound **26** was synthesized according to **GP-IV** from ethyl 5-(pyrazin-2-yl)-4,5-dihydroisoxazole-3-carboxylate and the DNA-tagged alkene **HP-8**. The product was formed with 46% yield (54% recovered **HP-8**).

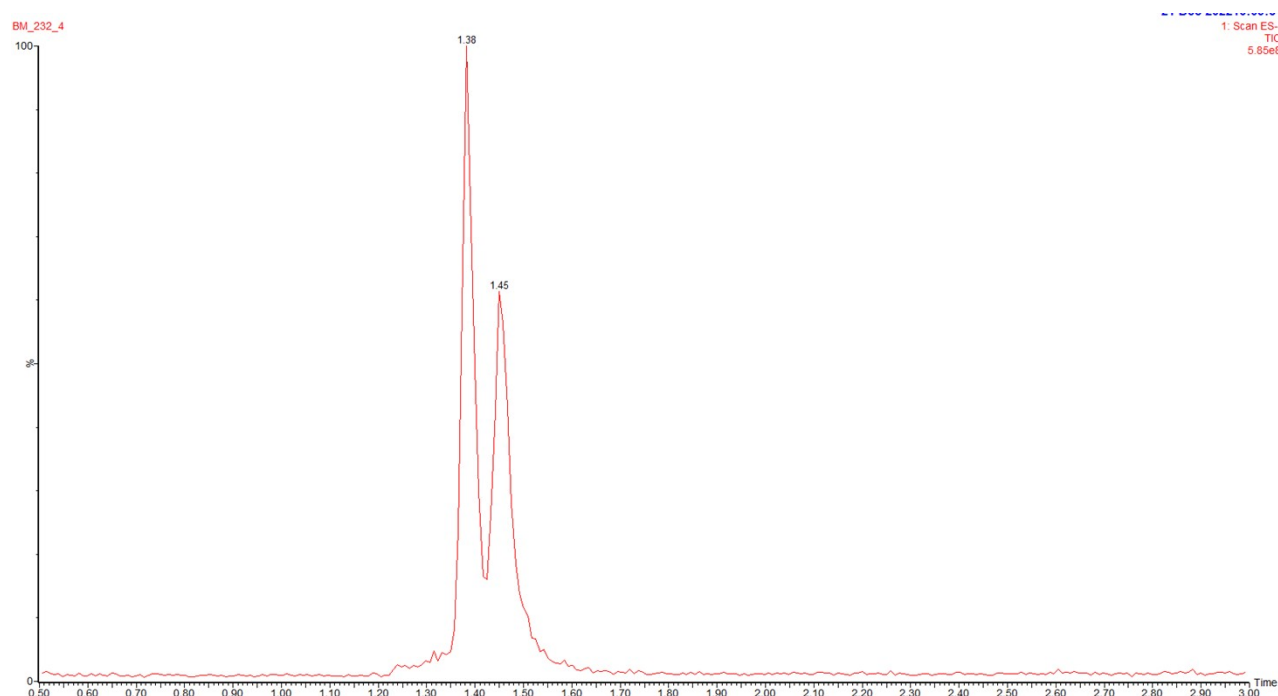

TIC of compound 26.

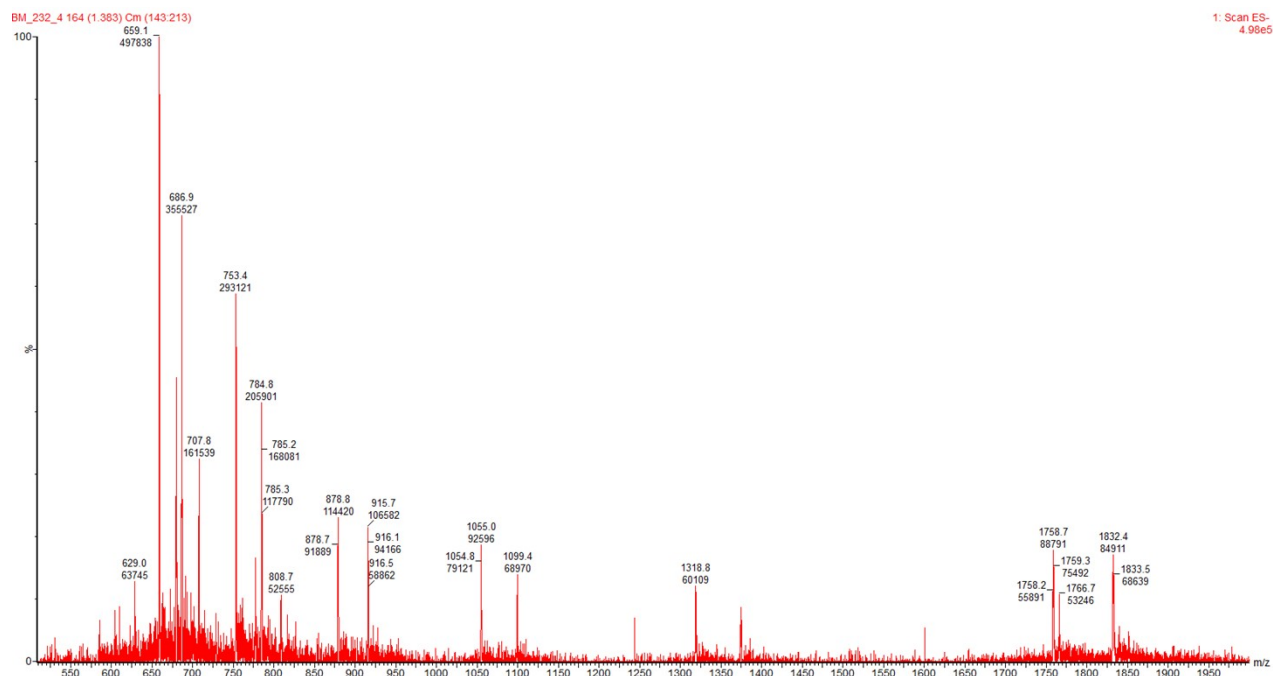

Raw MS of compound 26.

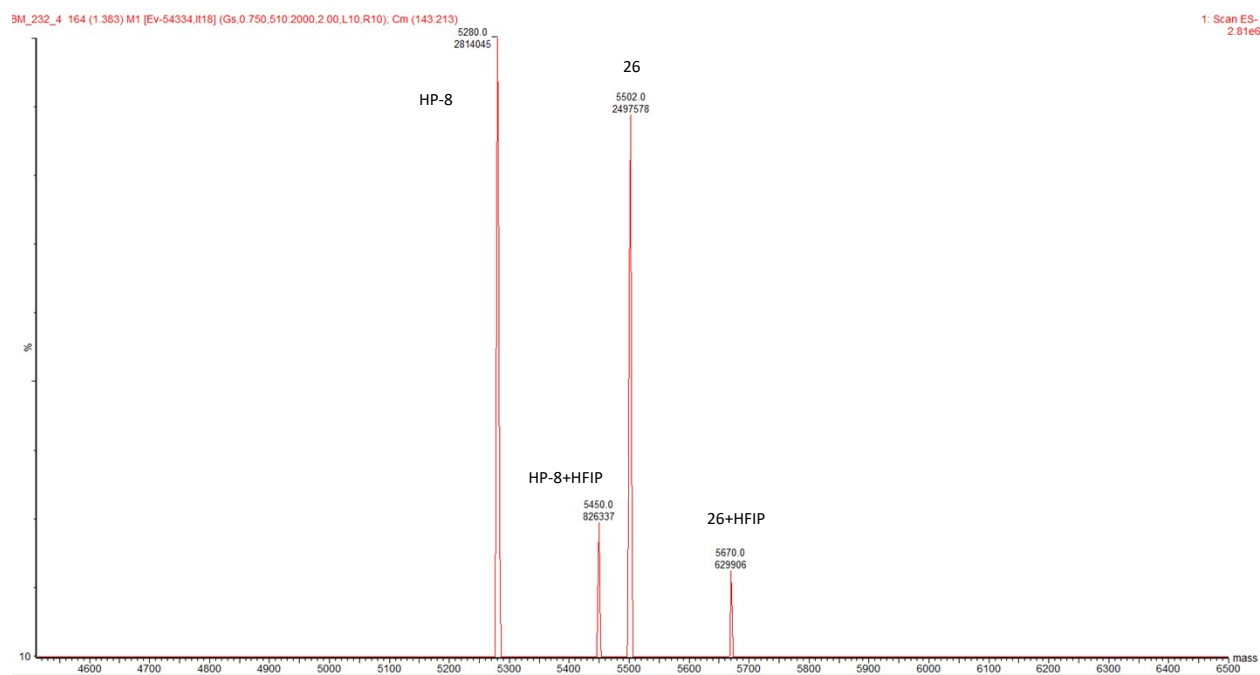

Deconvoluted MS of 26 (mass signals >10% of peak height).

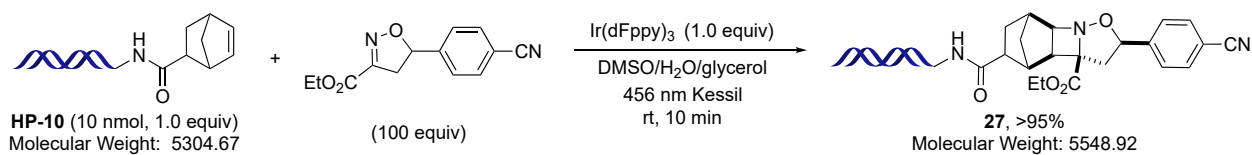

The title compound **27** was synthesized according to **GP-IV** from ethyl 5-(4-cyanophenyl)-4,5-dihydroisoxazole-3-carboxylate and the DNA-tagged alkene **HP-10**. The product was formed with > 95% conversion.

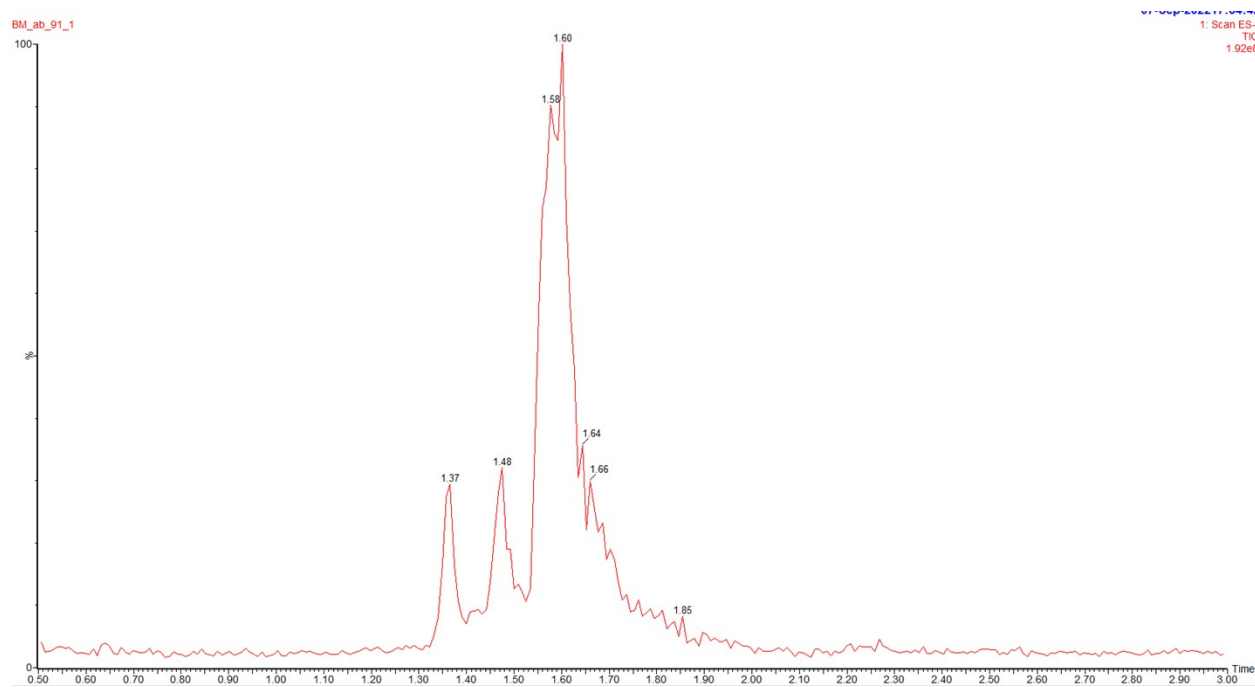

TIC of compound 27.

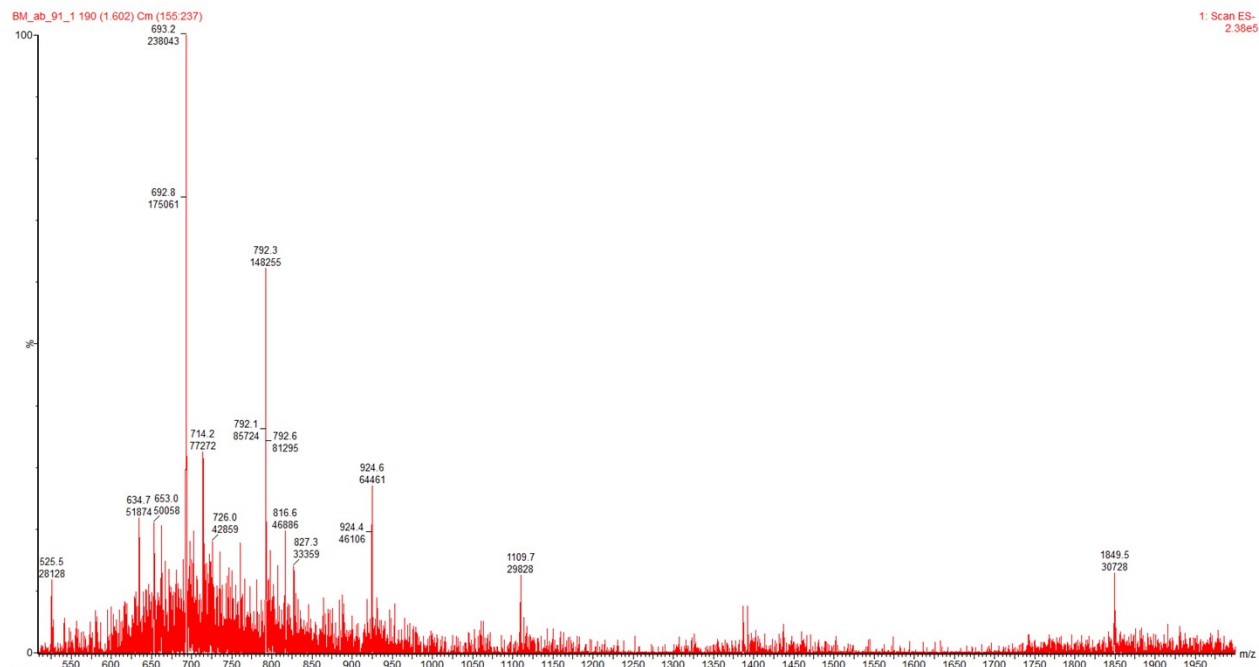

Raw MS of compound 27.

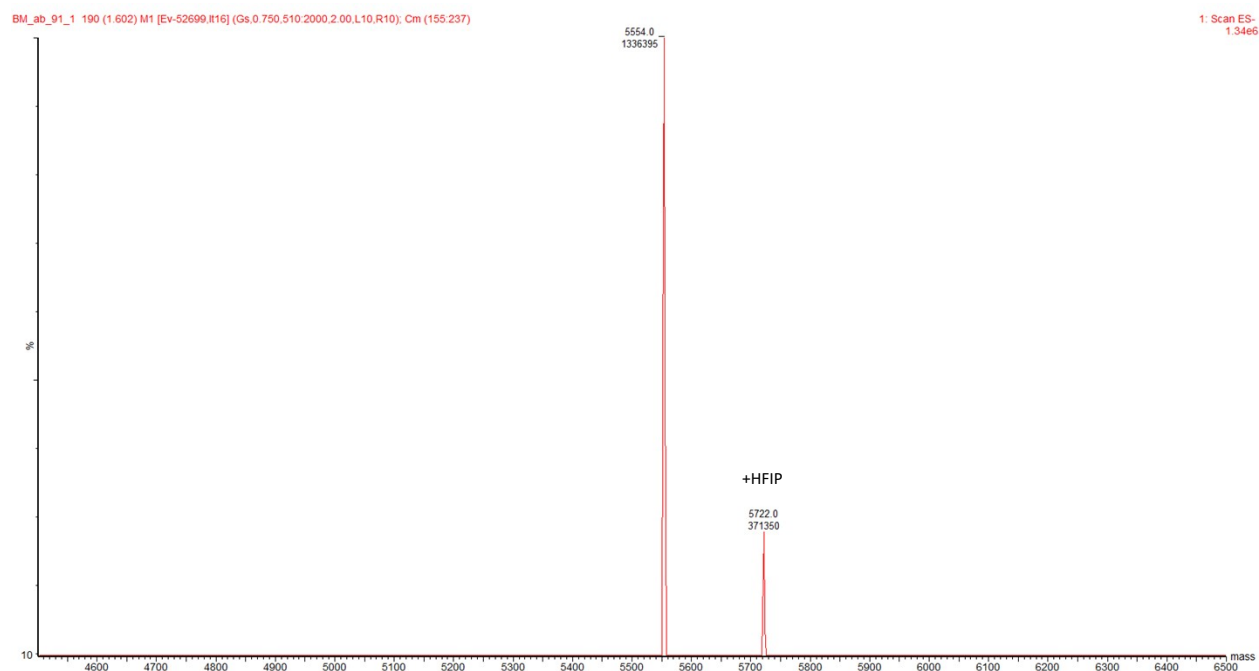

Deconvoluted MS of 27 (mass signals >10% of peak height).

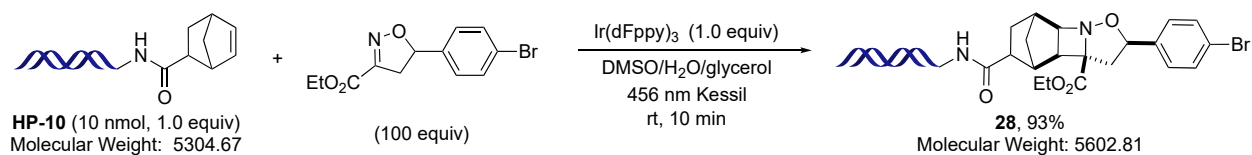

The title compound **28** was synthesized according to **GP-IV** from ethyl 5-(4-bromophenyl)-4,5-dihydroisoxazole-3-carboxylate and the DNA-tagged alkene **HP-10**. The product was formed with 93% conversion (6.5% recovered **HP-10**).

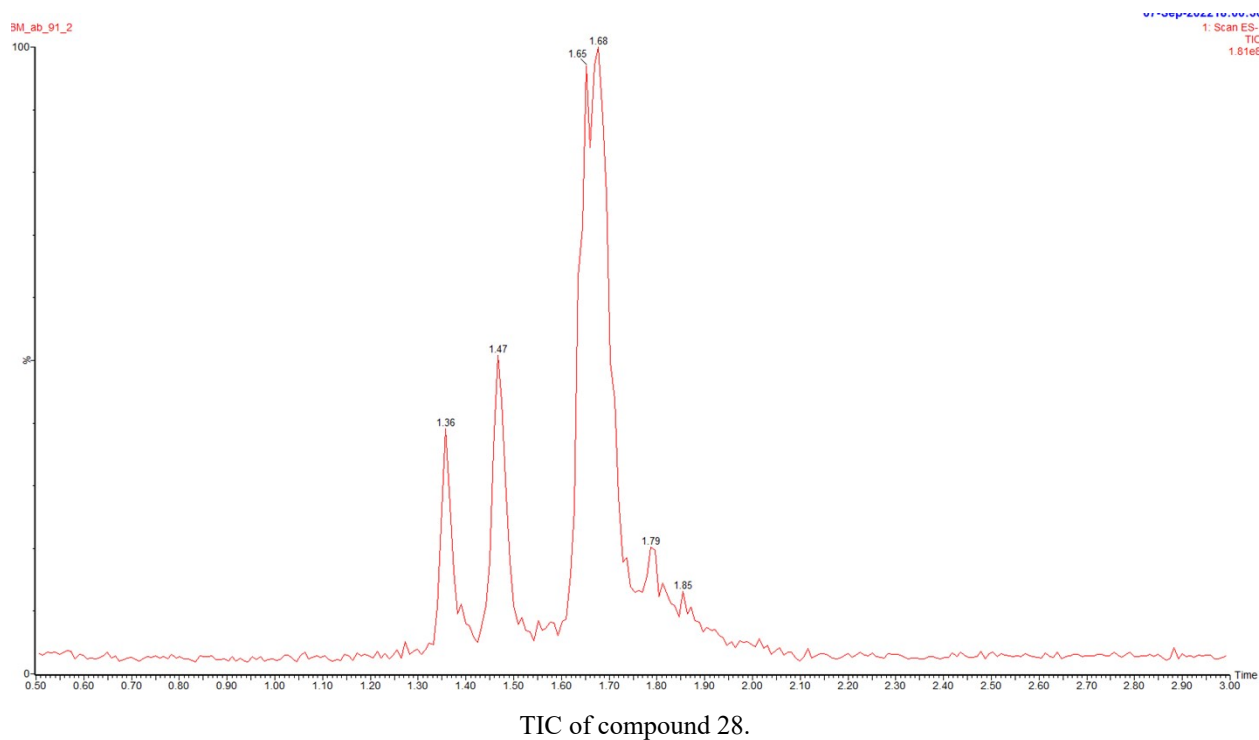

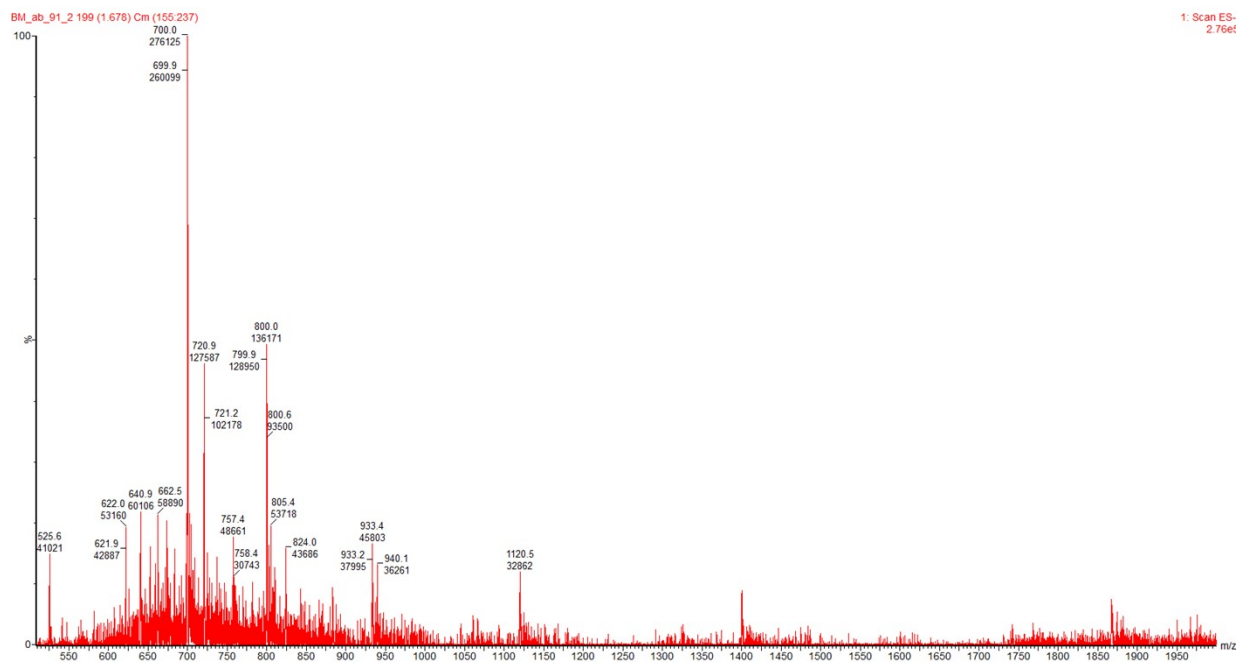

Raw MS of compound 28.

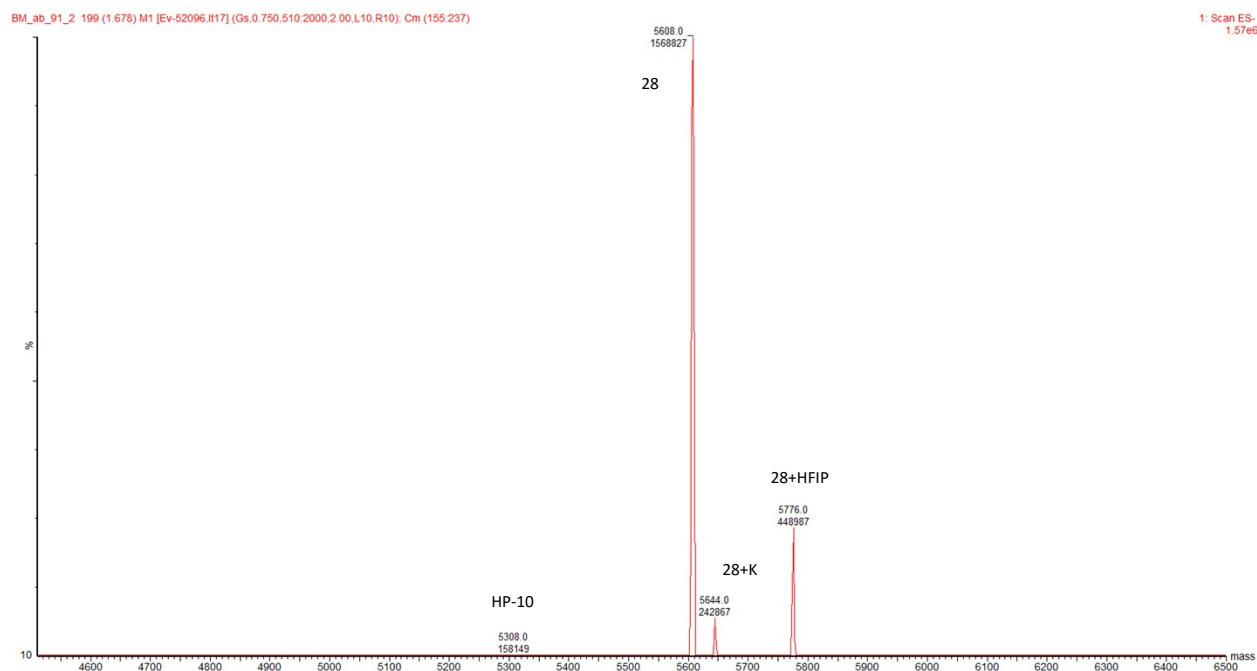

Deconvoluted MS of 28 (mass signals >10% of peak height).

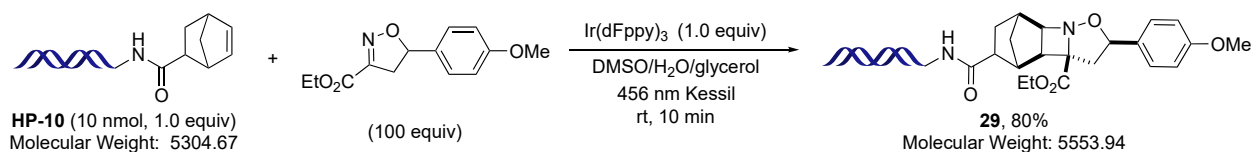

The title compound **29** was synthesized according to **GP-III** from ethyl 5-(4-methoxyphenyl)-4,5-dihydroisoxazole-3-carboxylate and the DNA-tagged alkene **HP-10**. The product was formed with 80% yield (7% recovered **HP-10**).

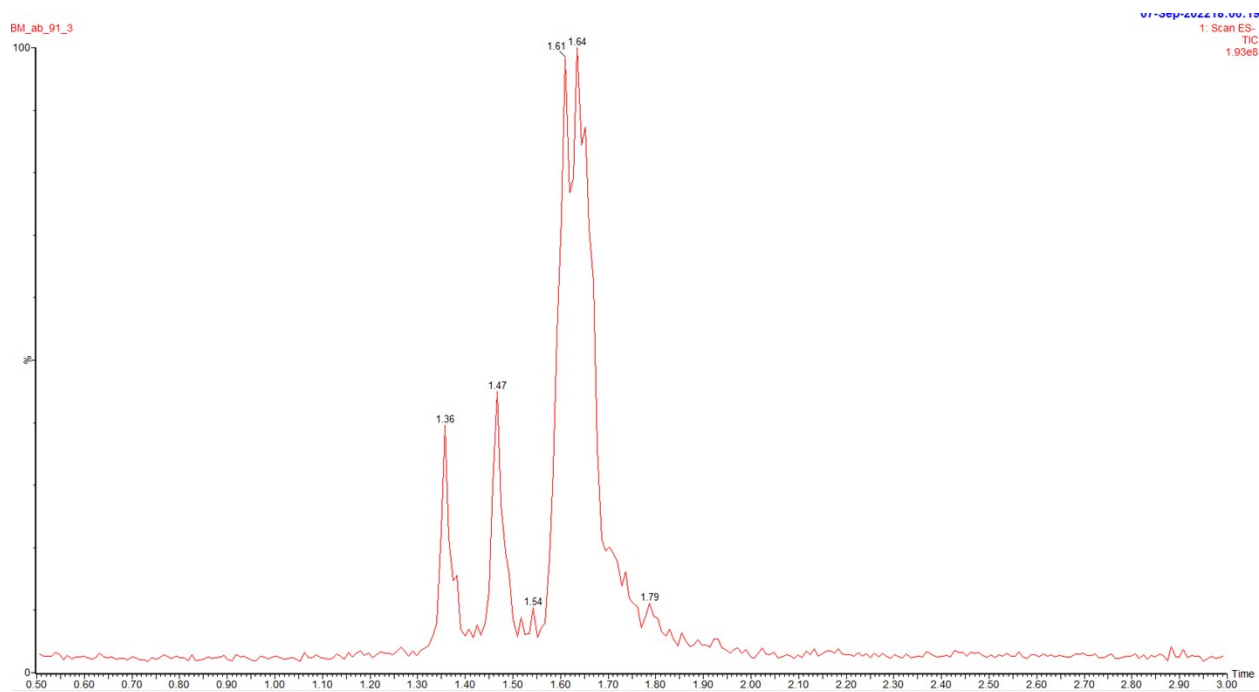

TIC of compound 29.

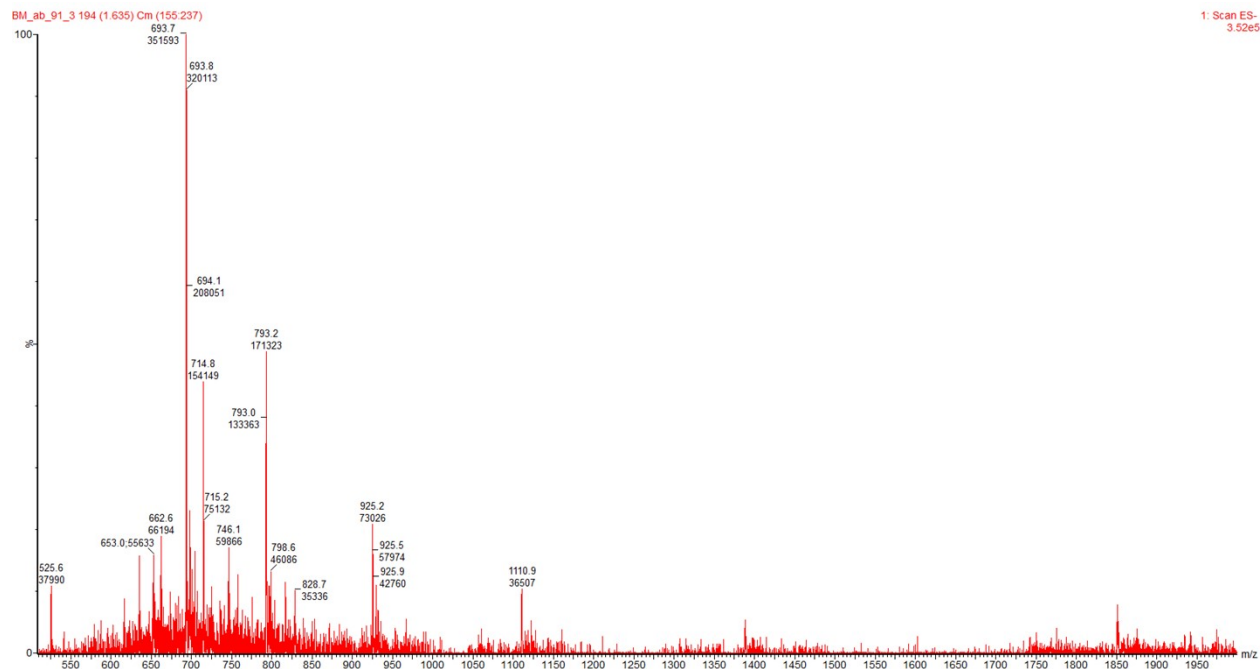

Raw MS of compound 29.

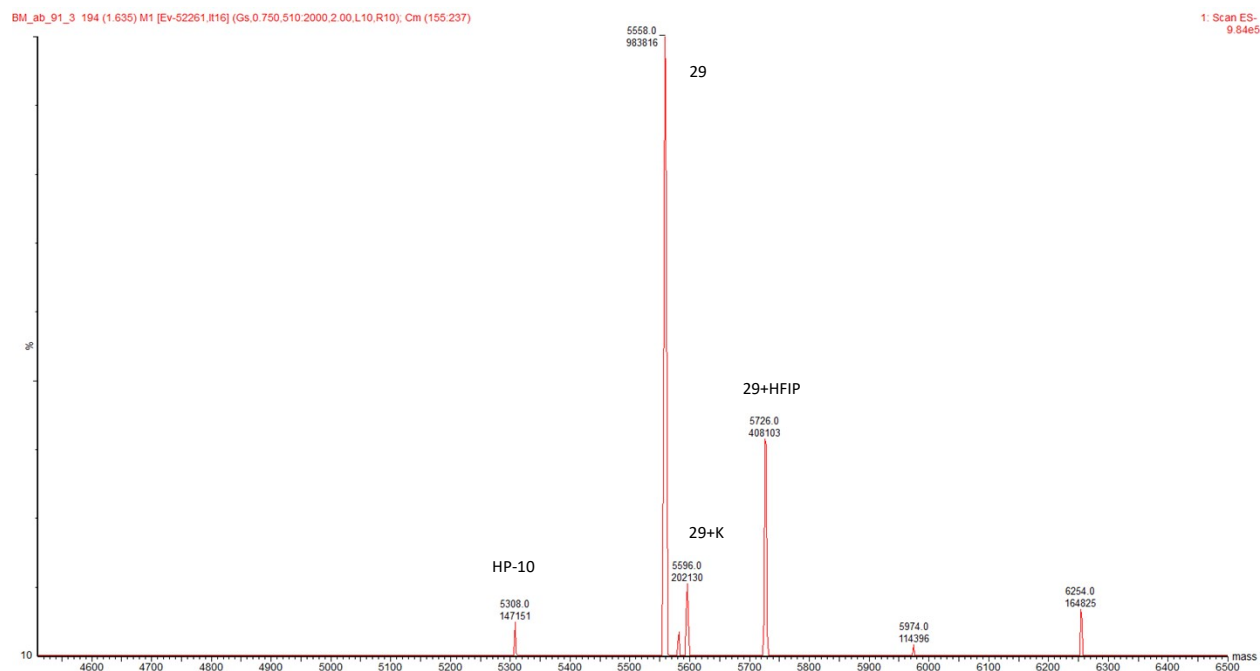

Deconvoluted MS of 29 (mass signals >10% of peak height).

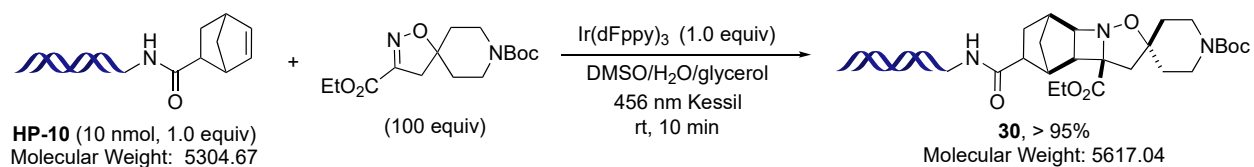

The title compound **30** was synthesized according to **GP-IV** from 8-(*tert*-butyl) 3-ethyl 1-oxa-2,8-diazaspiro[4.5]dec-2-ene-3,8-dicarboxylate and the DNA-tagged alkene **HP-10**. The product was formed with > 95% conversion.

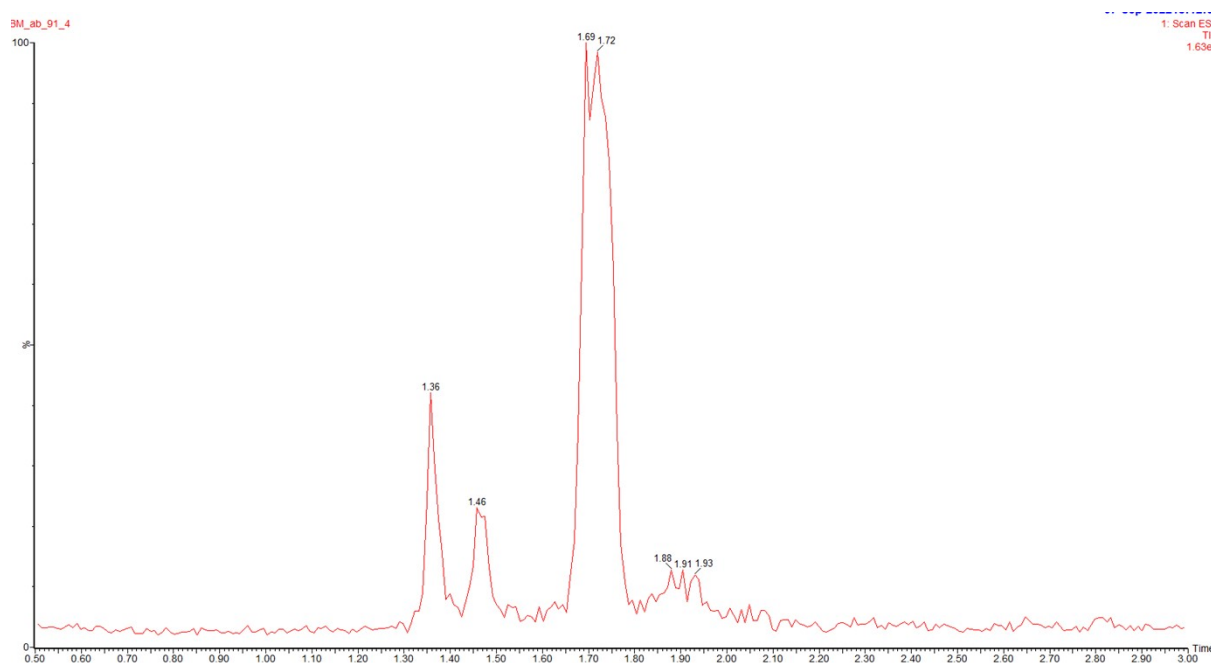

TIC of compound 30.

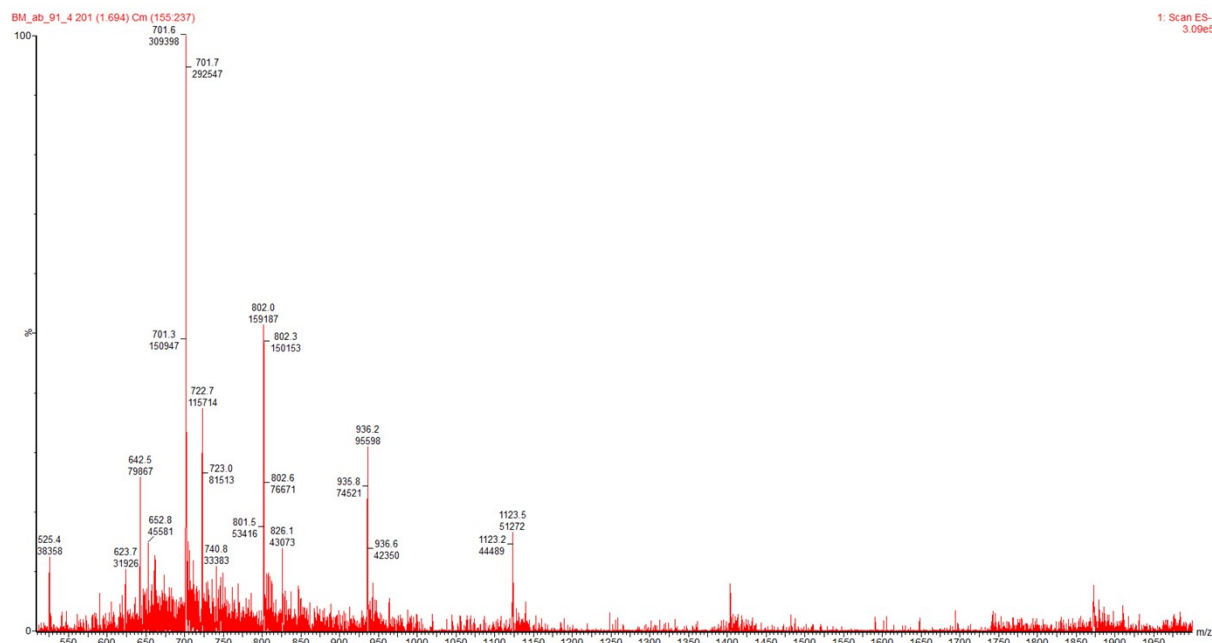

Raw MS of compound 30.

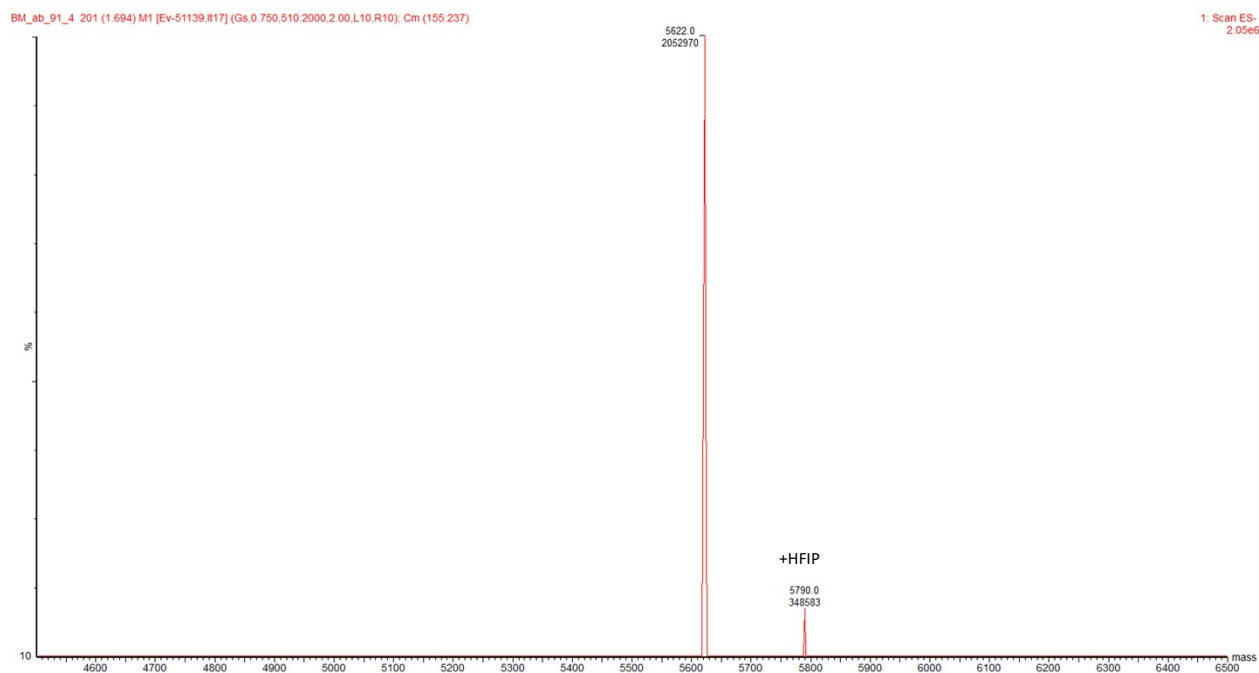

Deconvoluted MS of 30 (mass signals >10% of peak height).

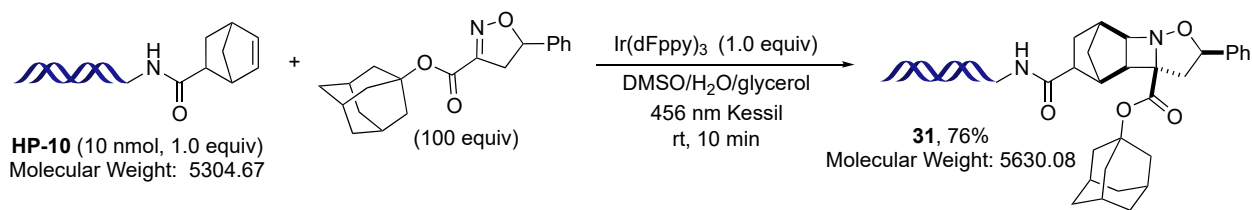

The title compound **31** was synthesized according to **GP-IV** from (3s,5s,7s)-adamantan-1-yl 5-phenyl-4,5-dihydroisoxazole-3-carboxylate and the DNA-tagged alkene **HP-10**. The product was formed with 76% conversion.

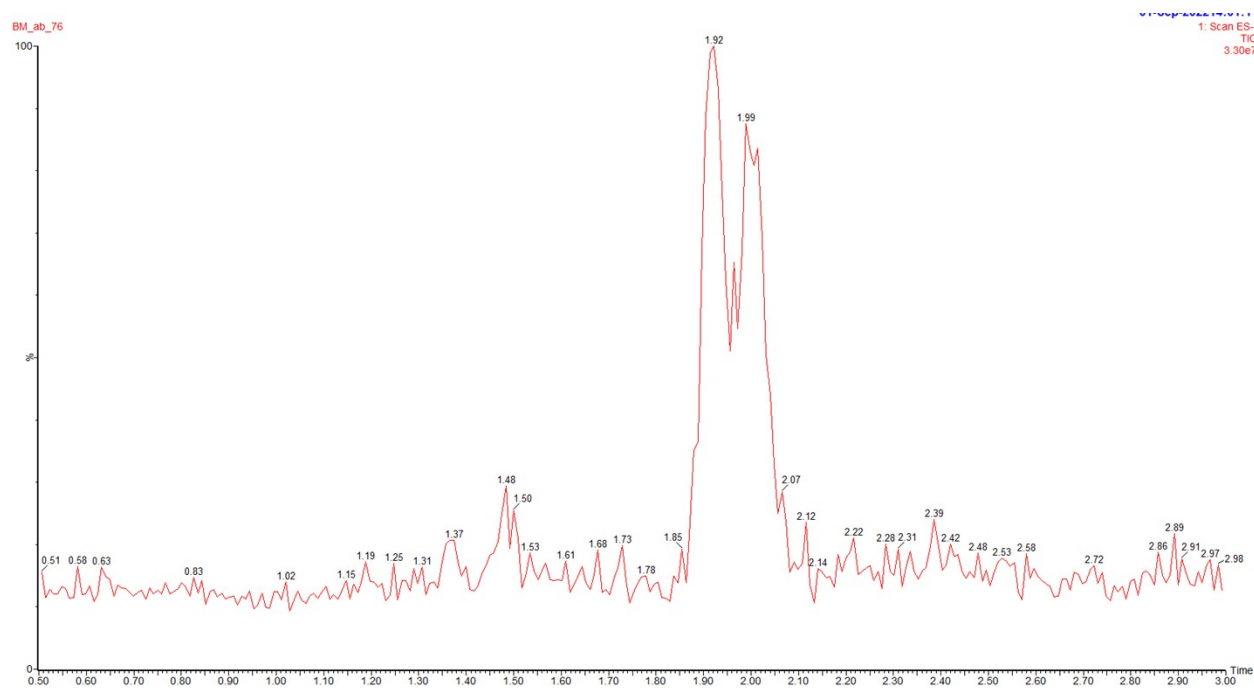

TIC of compound 31.

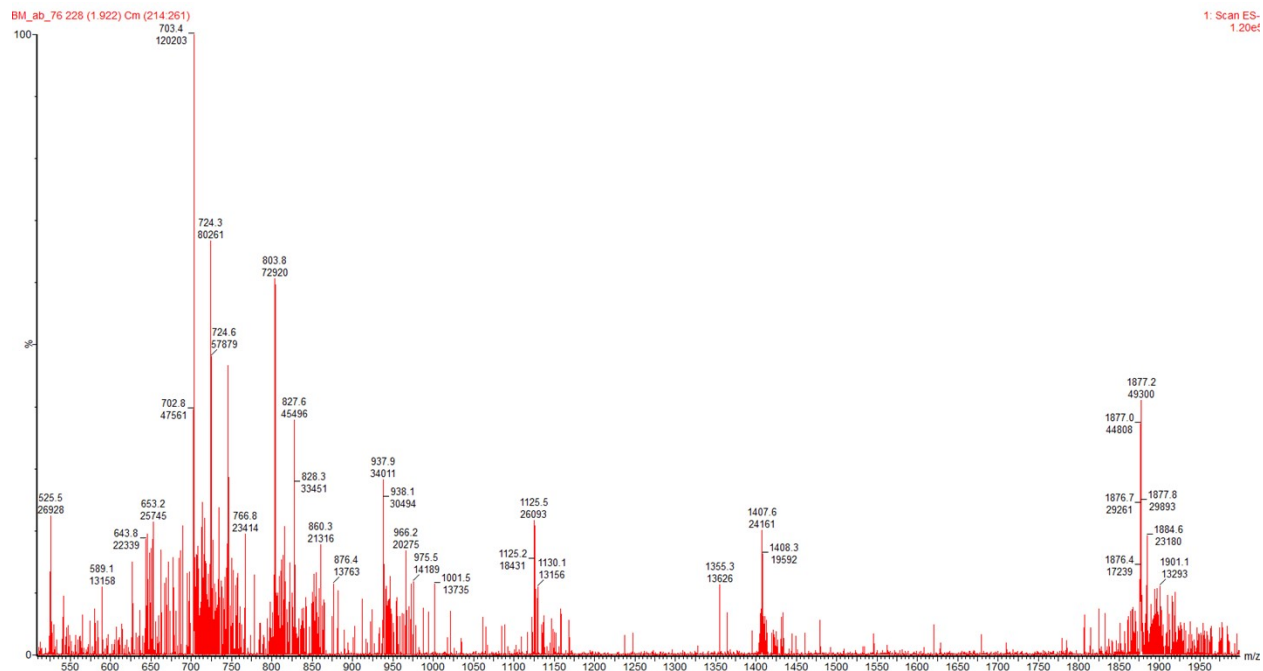

Raw MS of compound 31.

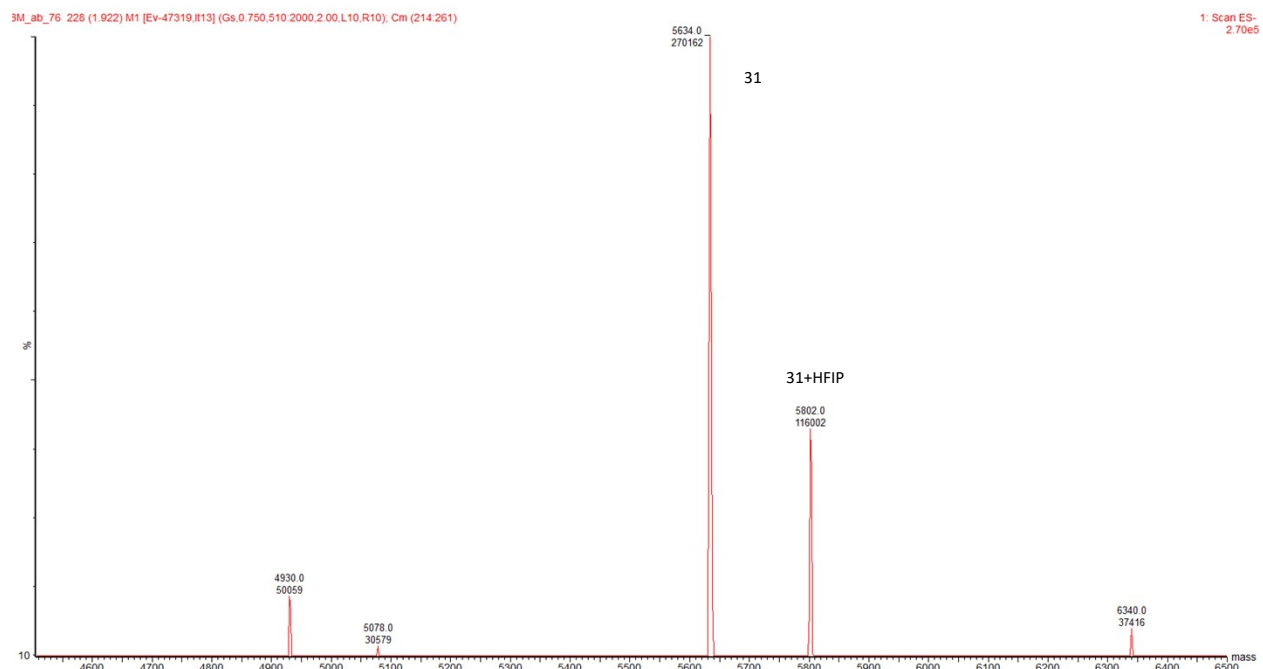

Deconvoluted MS of 31 (mass signals >10% of peak height).

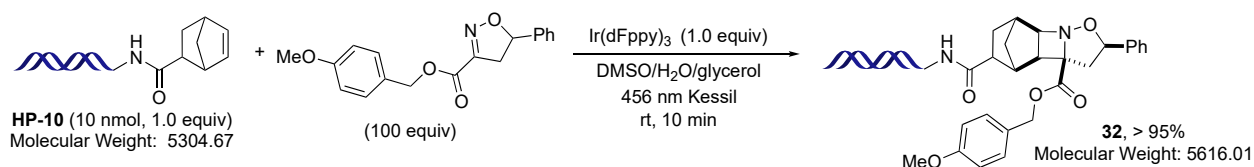

The title compound **32** was synthesized according to **GP-IV** from 4-methoxybenzyl 5-phenyl-4,5-dihydroisoxazole-3-carboxylate and the DNA-tagged alkene **HP-10**. The product was formed with >95% conversion.

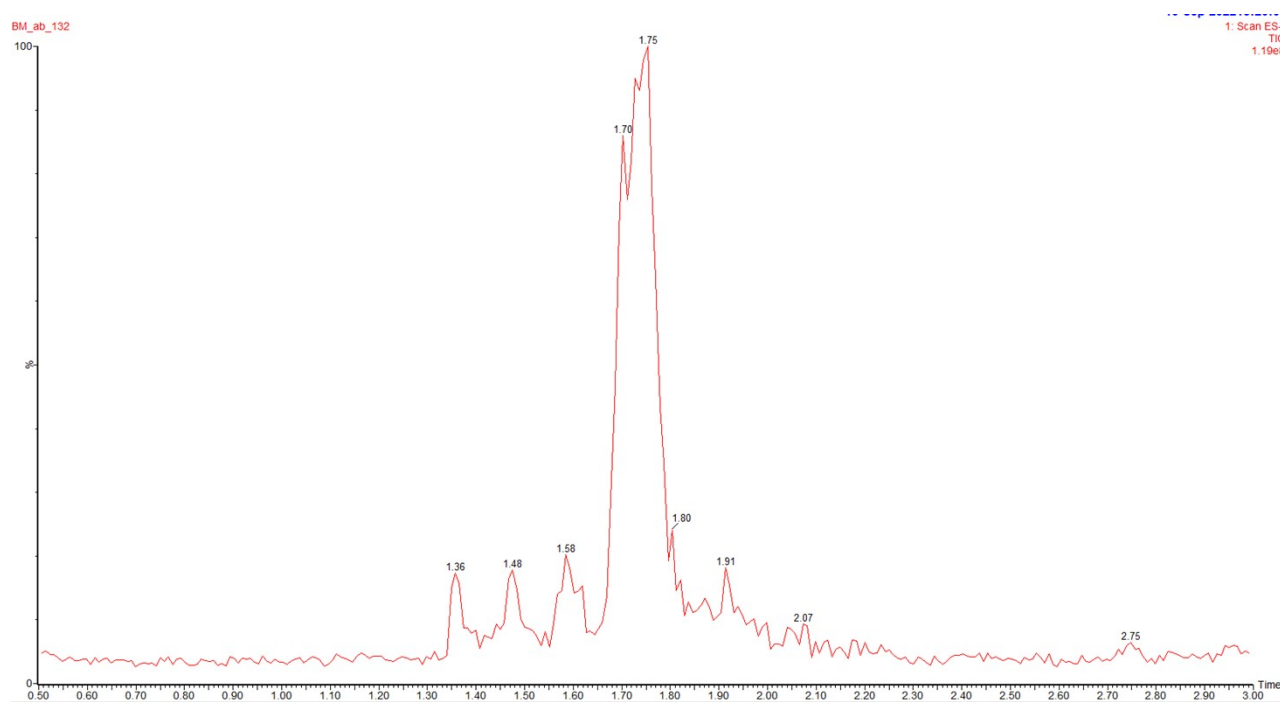

TIC of compound 32.

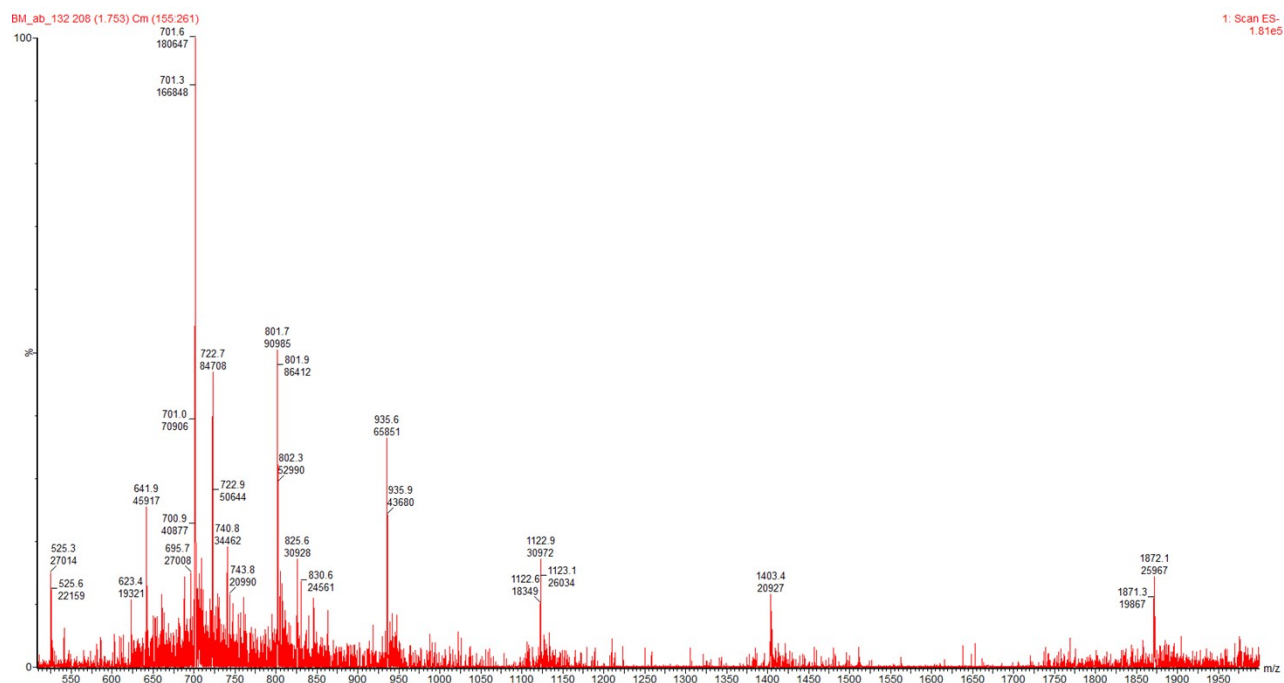

Raw MS of compound 32.

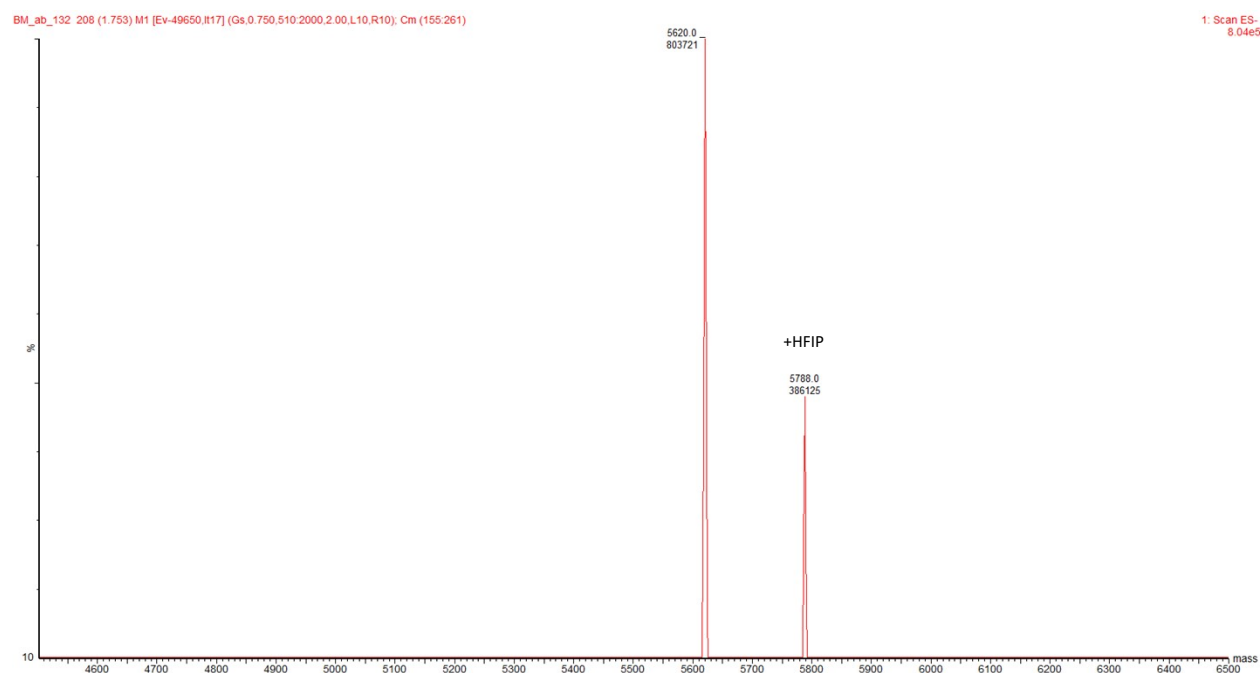

Deconvoluted MS of 32 (mass signals >10% of peak height).

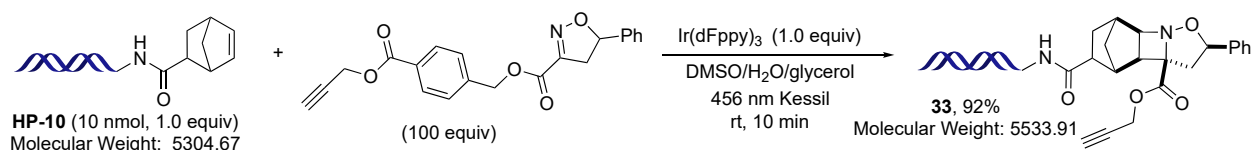

The title compound **33** was synthesized according to **GP-IV** from prop-2-yn-1-yl 5-phenyl-4,5-dihydroisoxazole-3-carboxylate and the DNA-tagged alkene **HP-10**. The product was formed with 92% conversion.

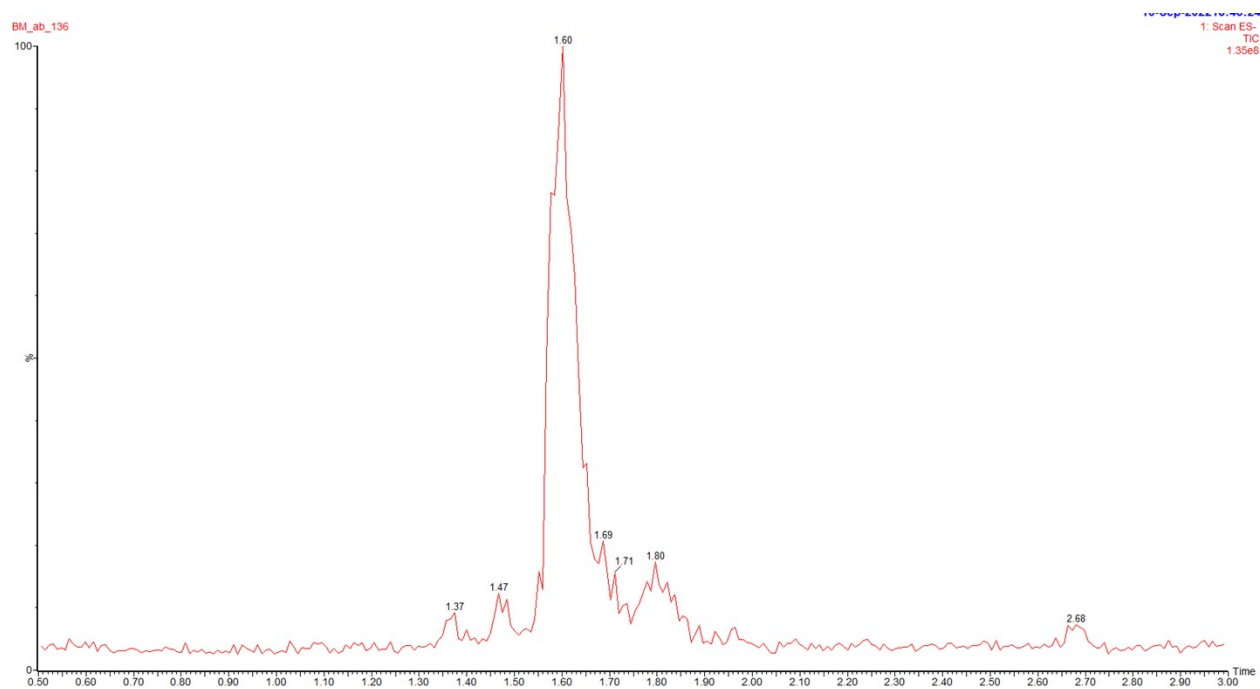

TIC of compound 33.



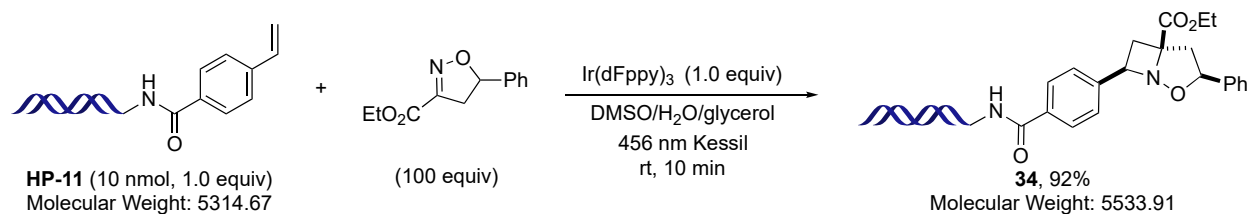

The title compound **34** was synthesized according to **GP-IV** from ethyl 5-phenyl-4,5-dihydroisoxazole-3-carboxylate and the DNA-tagged alkene **HP-11**. The product was formed with 92% conversion.

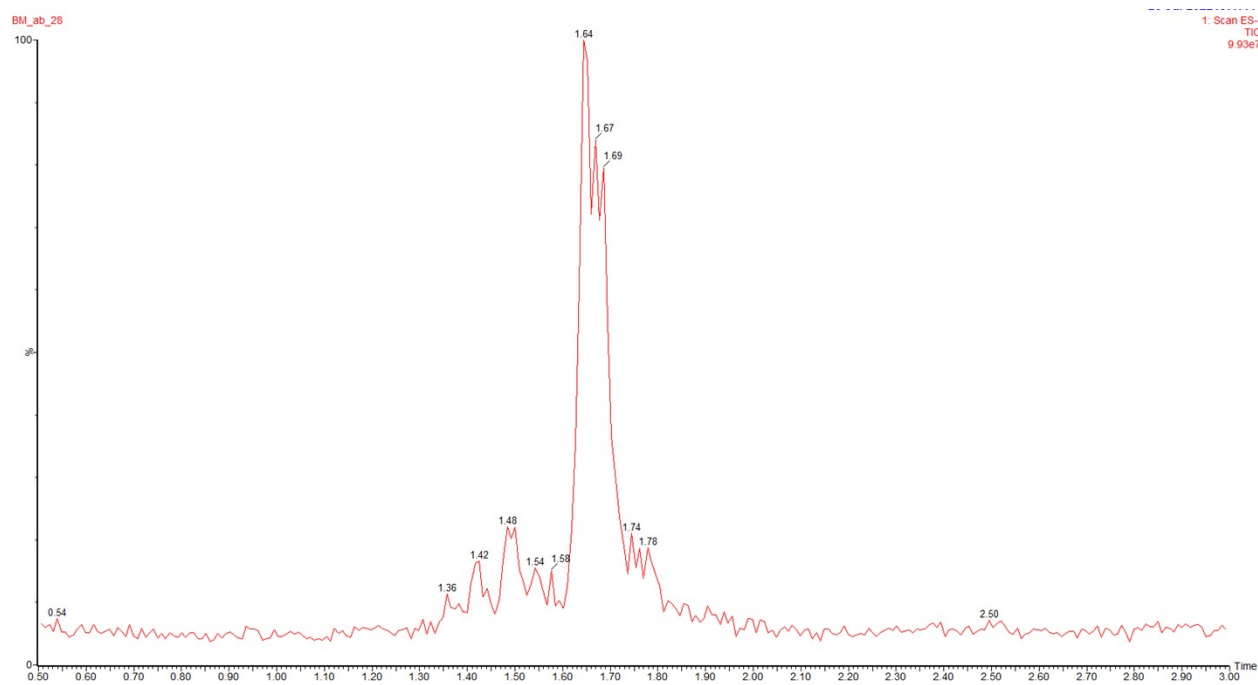



The title compound **35** was synthesized according to **GP-IV** from ethyl 5-(4-cyanophenyl)-4,5-dihydroisoxazole-3-carboxylate and the DNA-tagged alkene **HP-11**. The product was formed with 75% conversion.

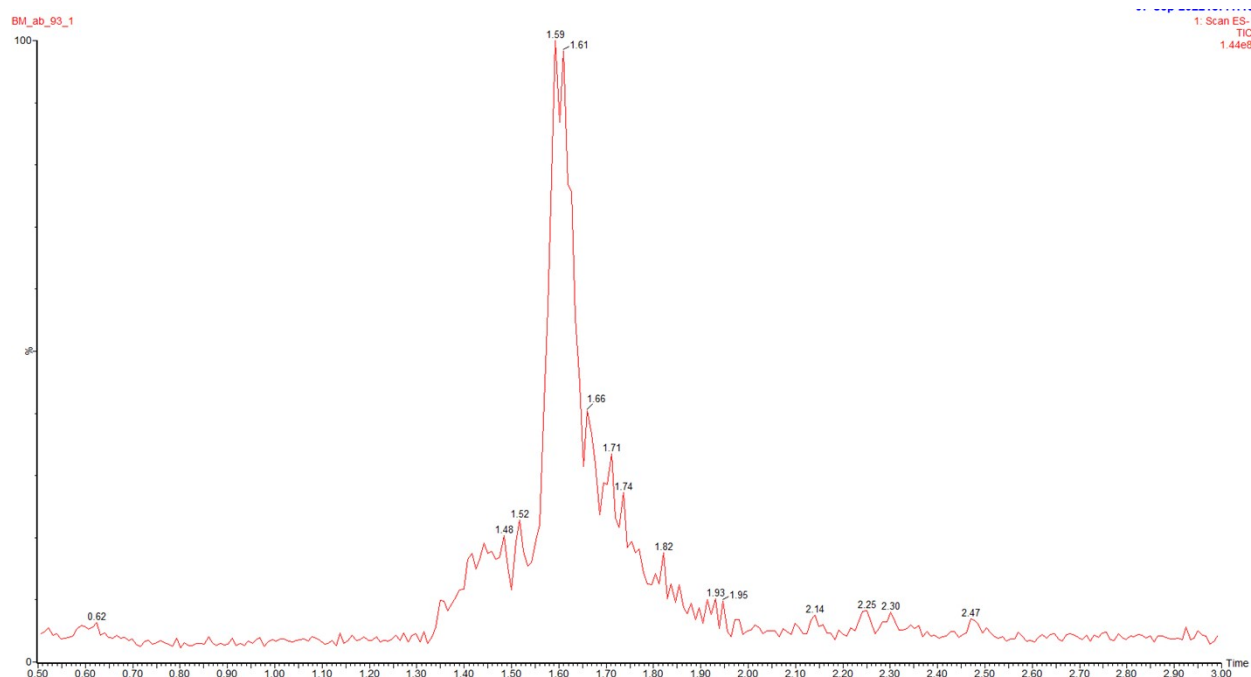

TIC of compound 35.

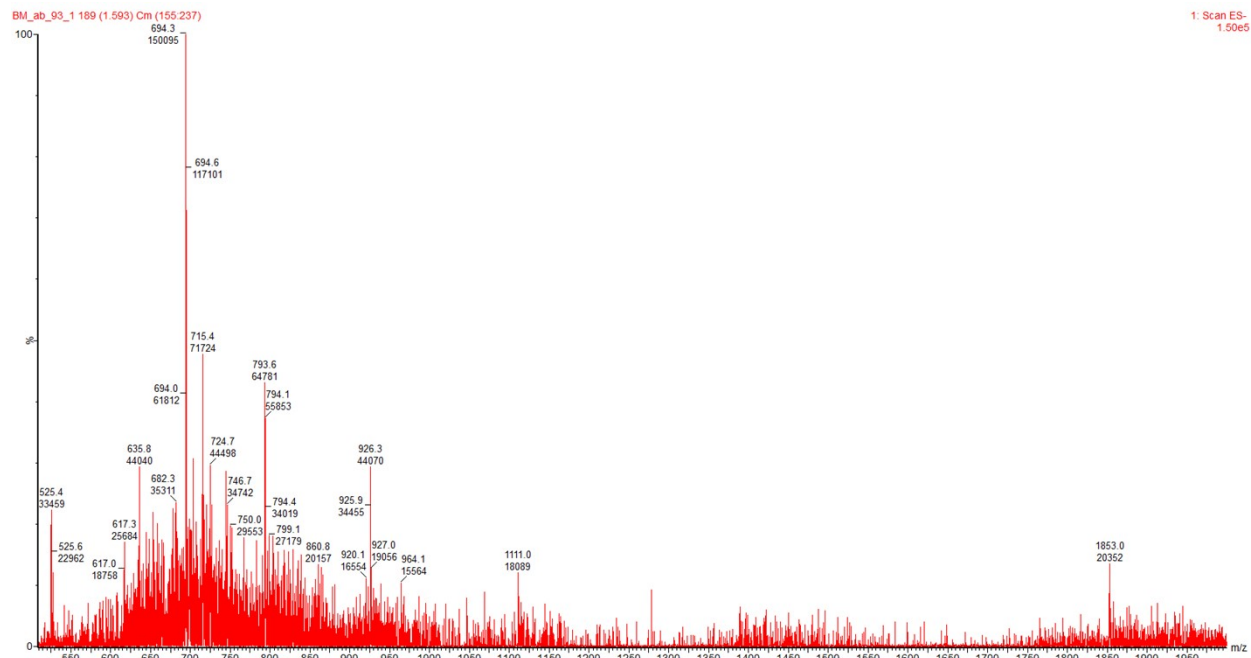

Raw MS of compound 35.

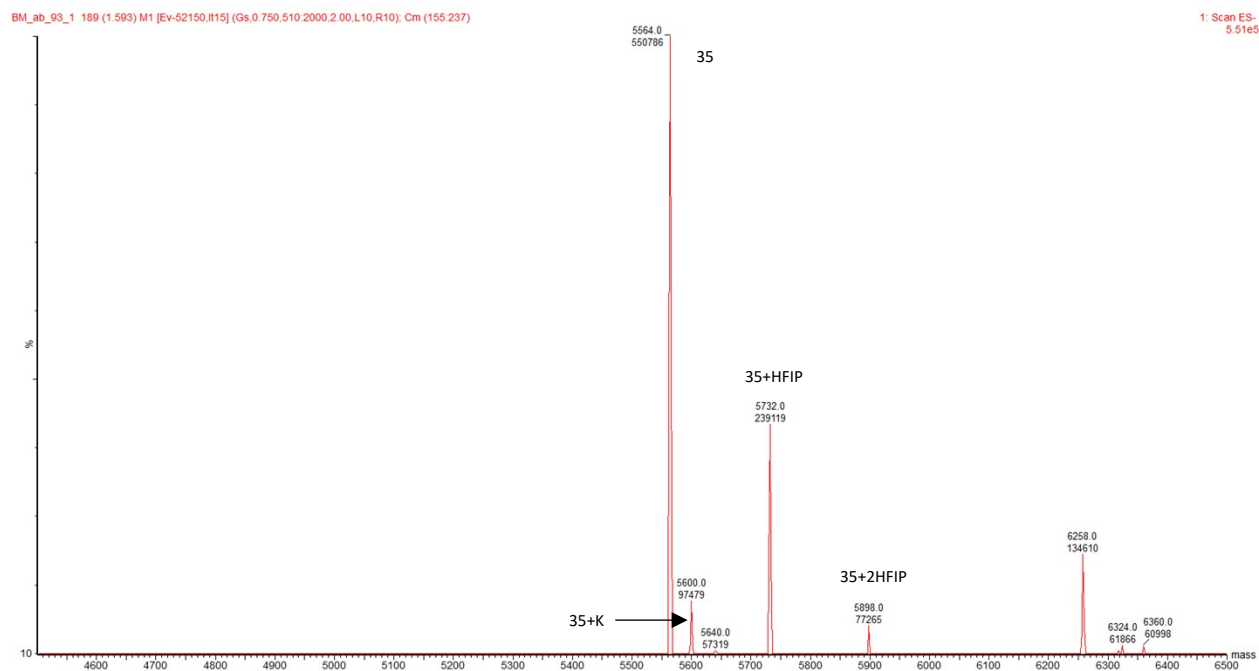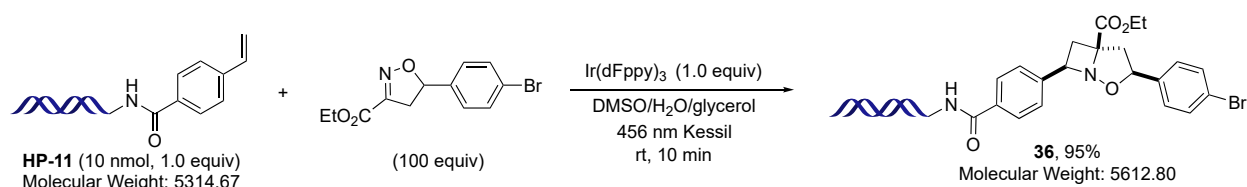

The title compound **36** was synthesized according to **GP-IV** from ethyl 5-(4-bromophenyl)-4,5-dihydroisoxazole-3-carboxylate and the DNA-tagged alkene **HP-11**. The product was formed with 95% conversion.

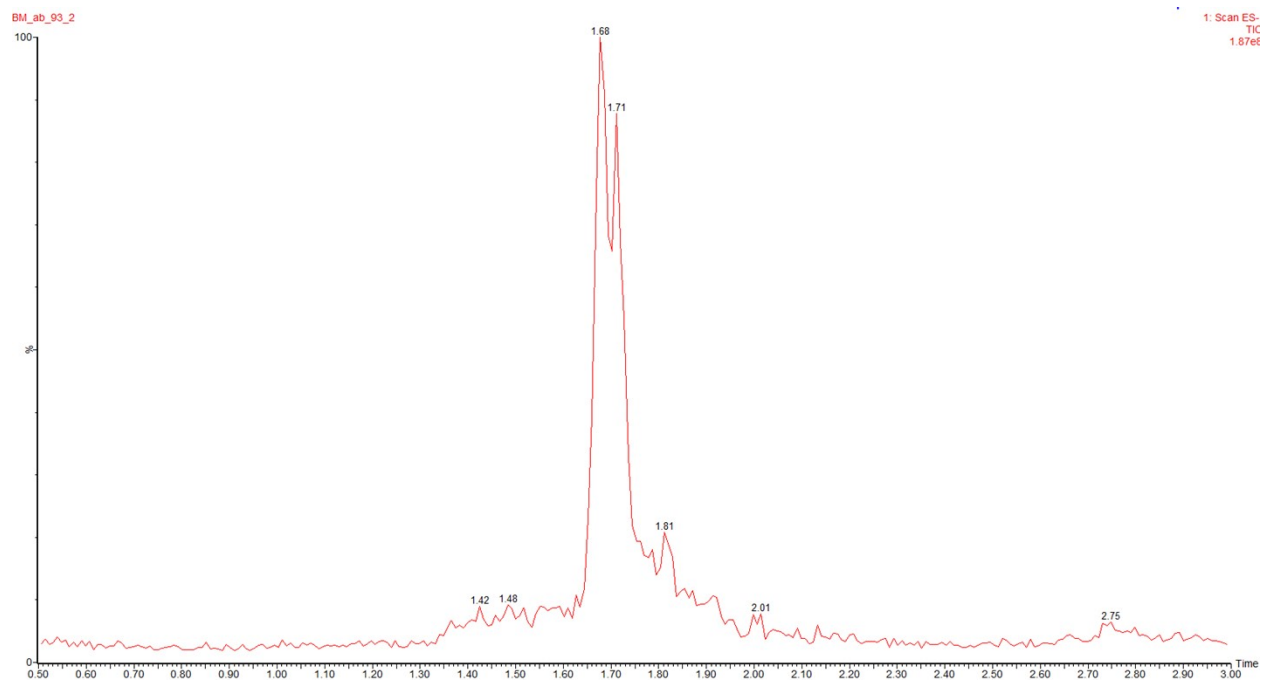

TIC of compound 36.

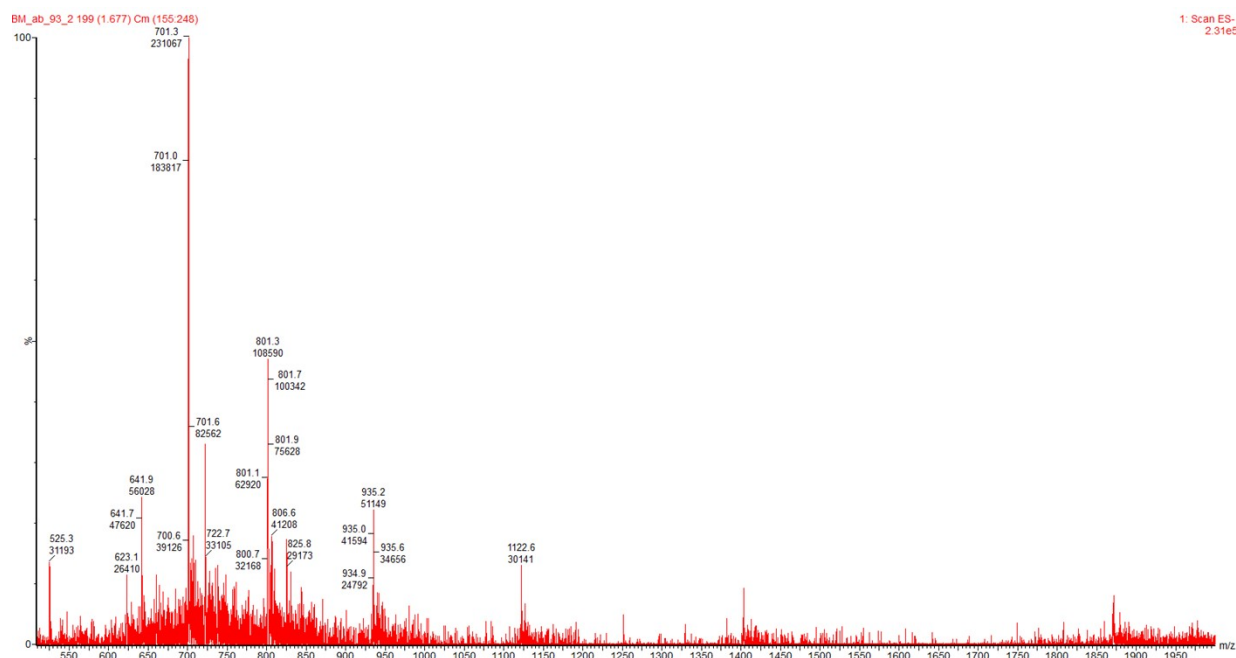

Raw MS of compound 36.

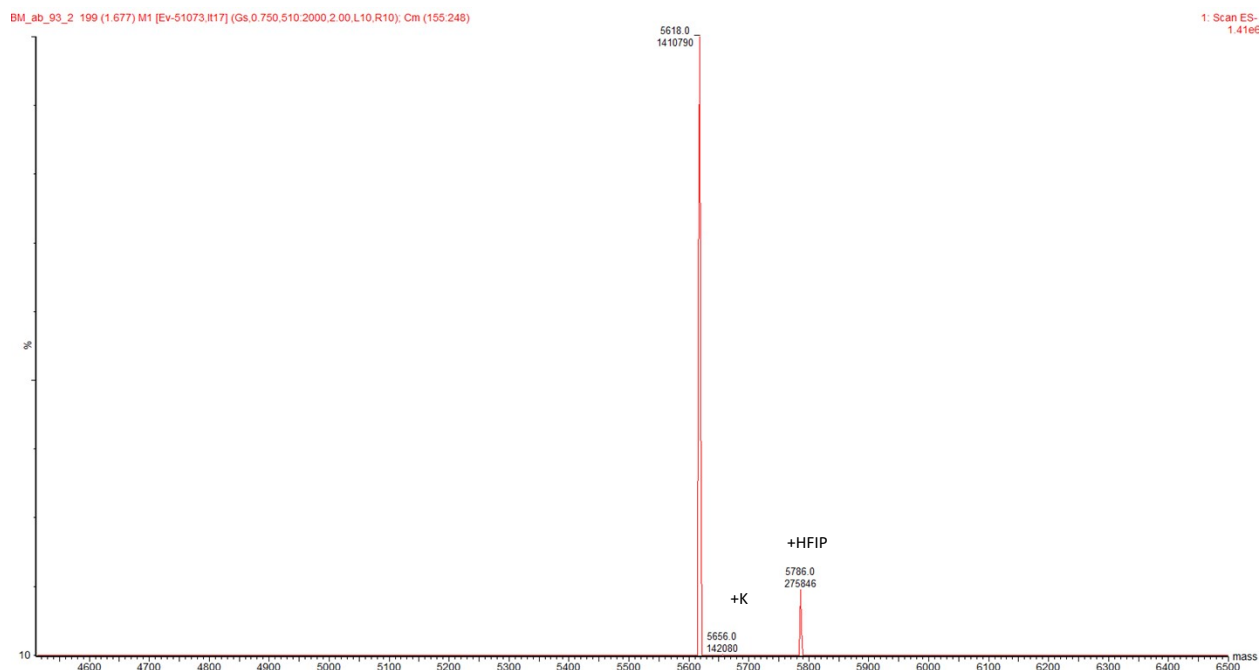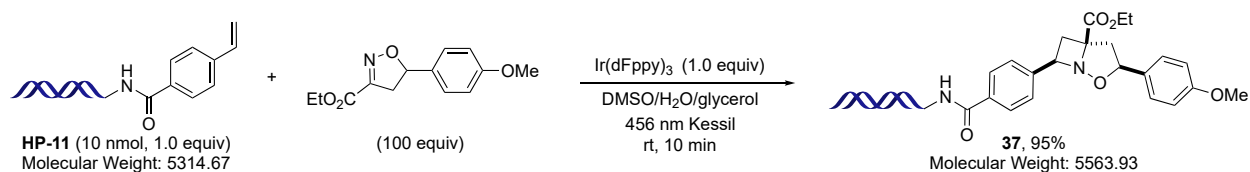

The title compound **37** was synthesized according to **GP-IV** from ethyl 5-(4-bromophenyl)-4,5-dihydroisoxazole-3-carboxylate and the DNA-tagged alkene **HP-11**. The product was formed with 95% conversion.

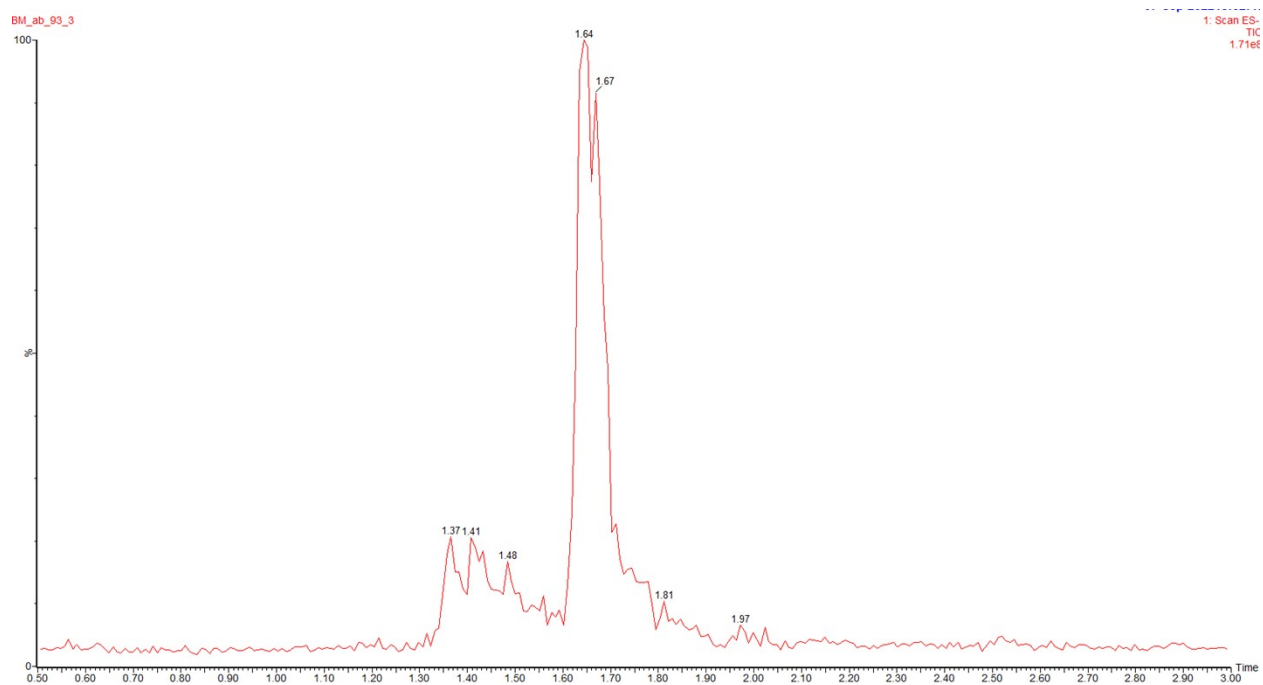

TIC of compound 37.

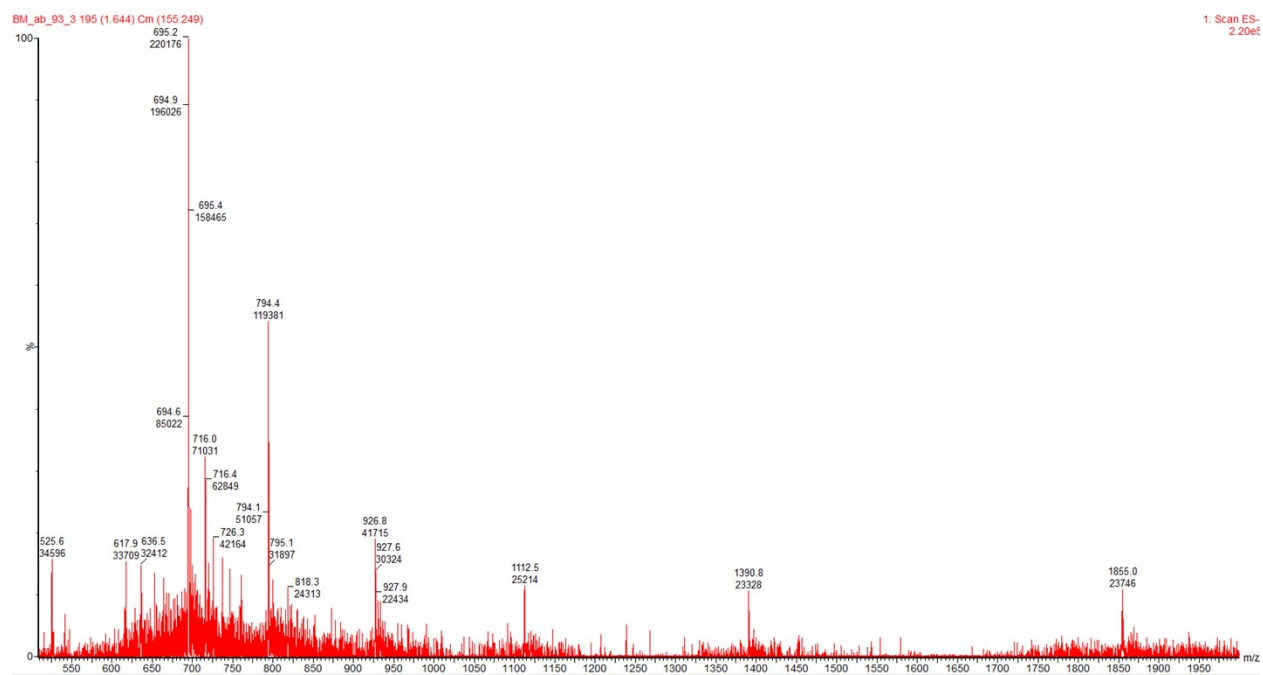

Raw MS of compound 37.

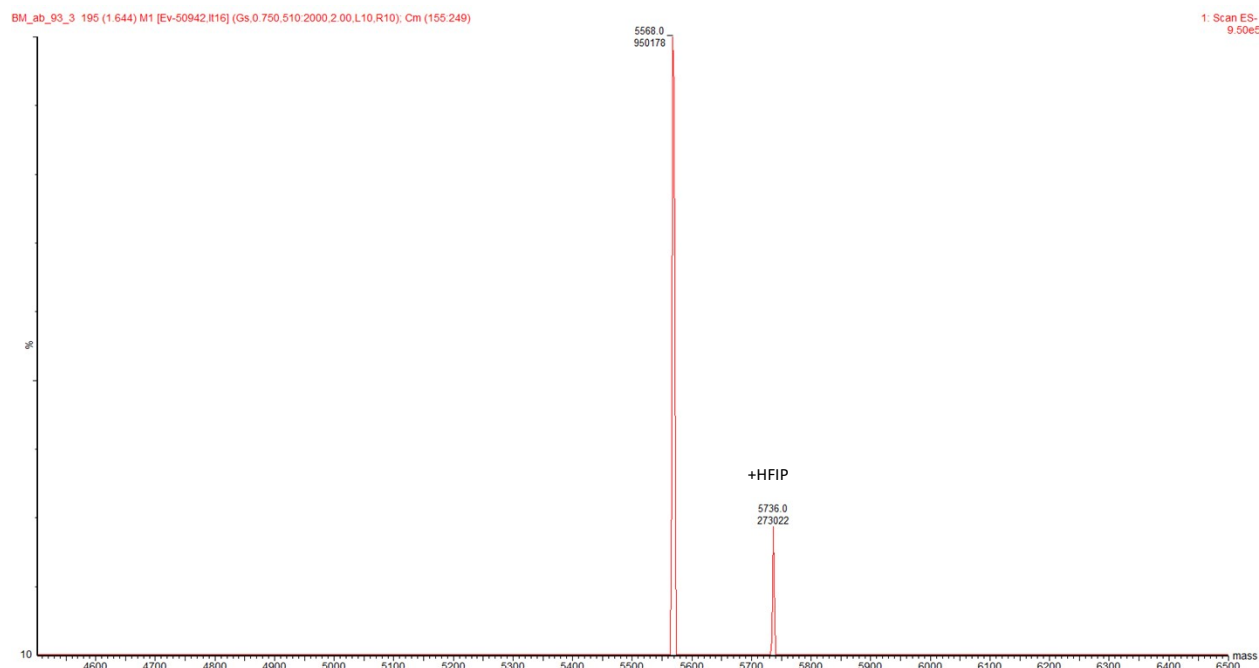

Deconvoluted MS of 37 (mass signals >10% of peak height).

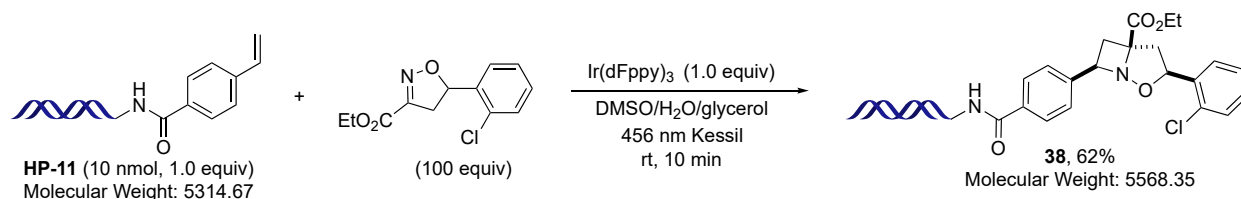

The title compound **38** was synthesized according to **GP-IV** from ethyl 5-(2-chlorophenyl)-4,5-dihydroisoxazole-3-carboxylate and the DNA-tagged alkene **HP-11**. The product was formed with 62% conversion.

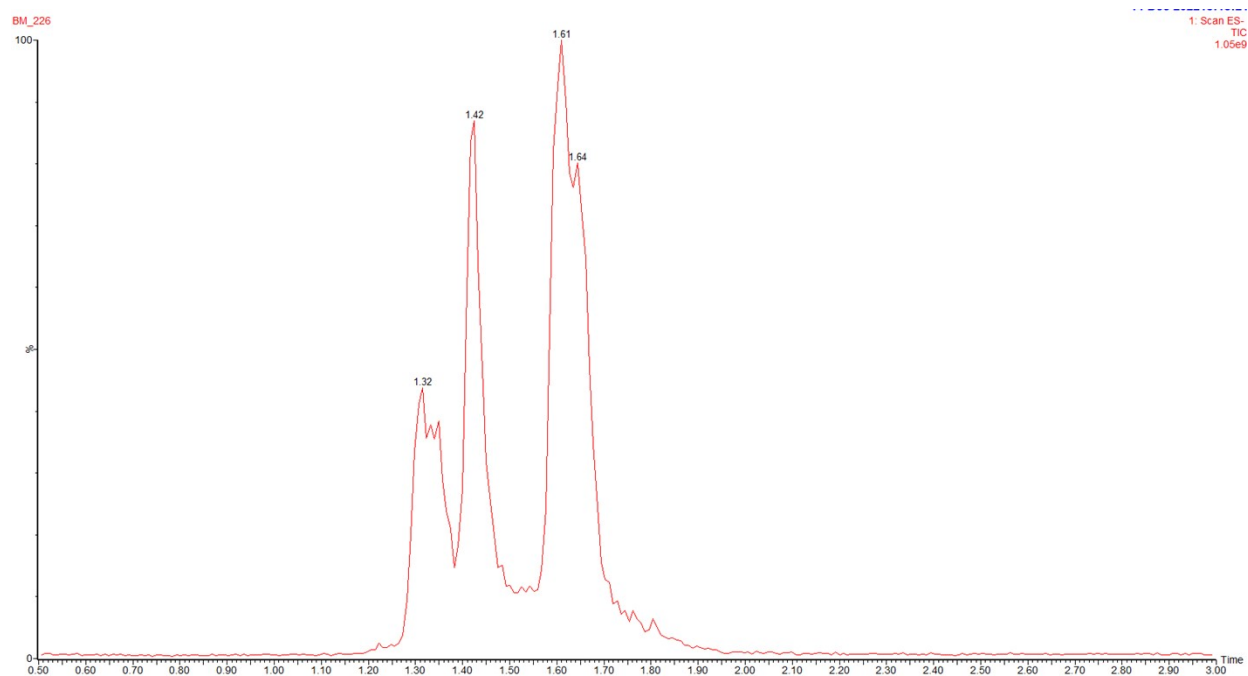

TIC of compound 38.

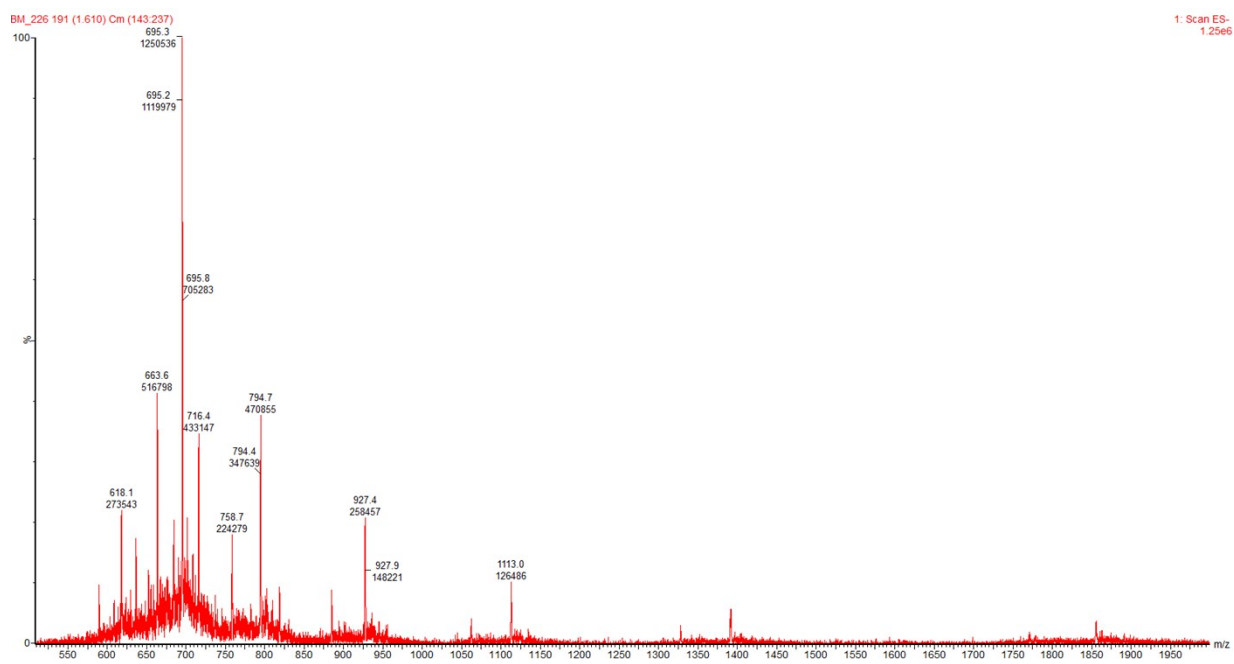

Raw MS of compound 38.

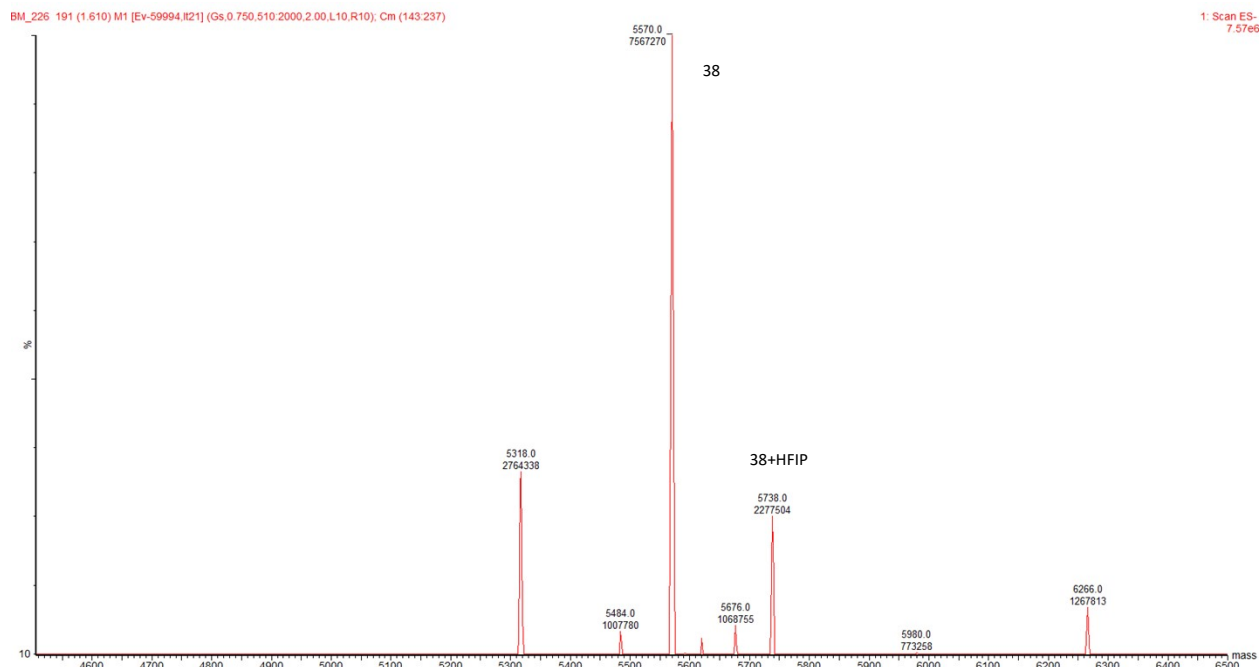

Deconvoluted MS of 38 (mass signals >10% of peak height).

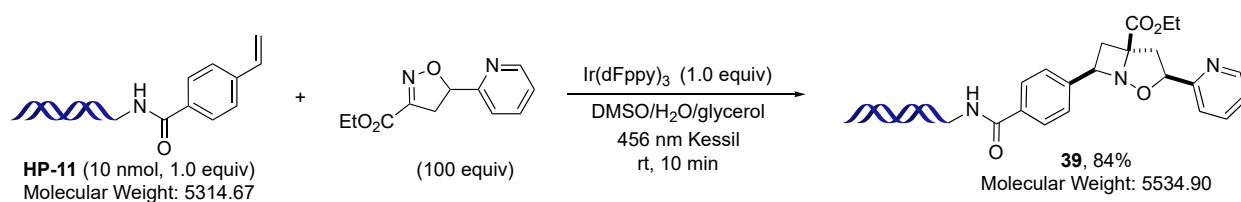

The title compound **39** was synthesized according to **GP-III** from ethyl 5-(pyridin-2-yl)-4,5-dihydroisoxazole-3-carboxylate and the DNA-tagged alkene **HP-11**. The product was formed with 84% yield (8% recovered **HP-11**).

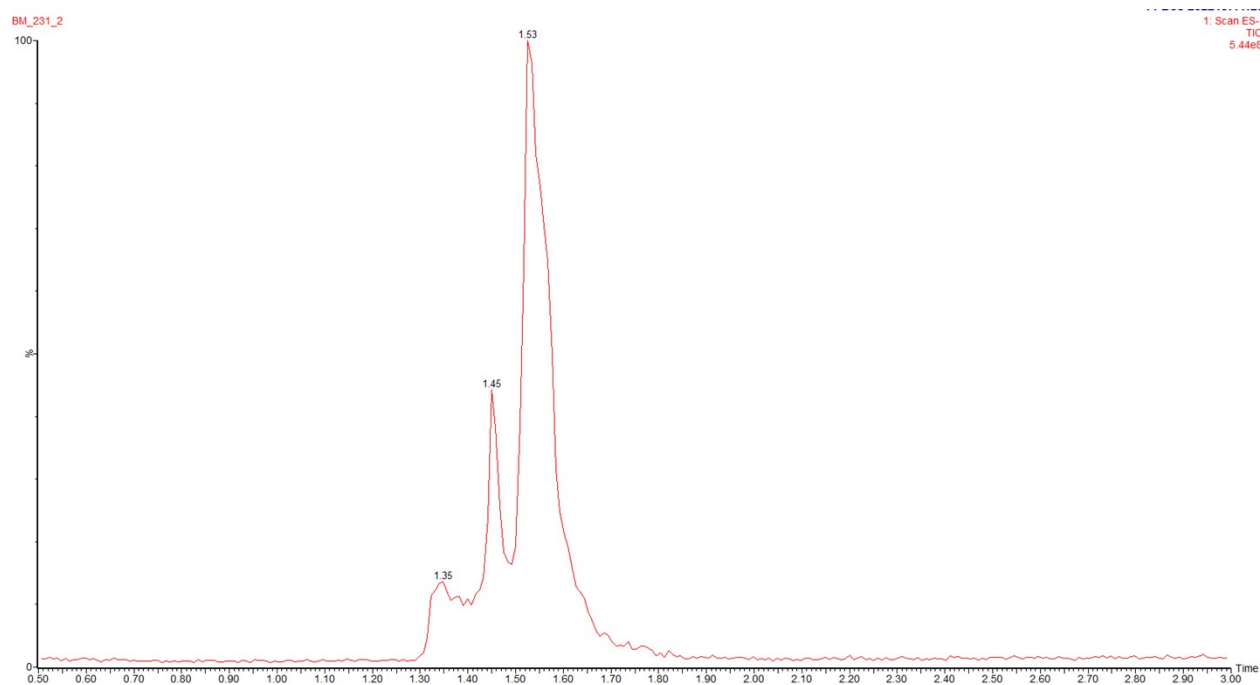

TIC of compound 39.

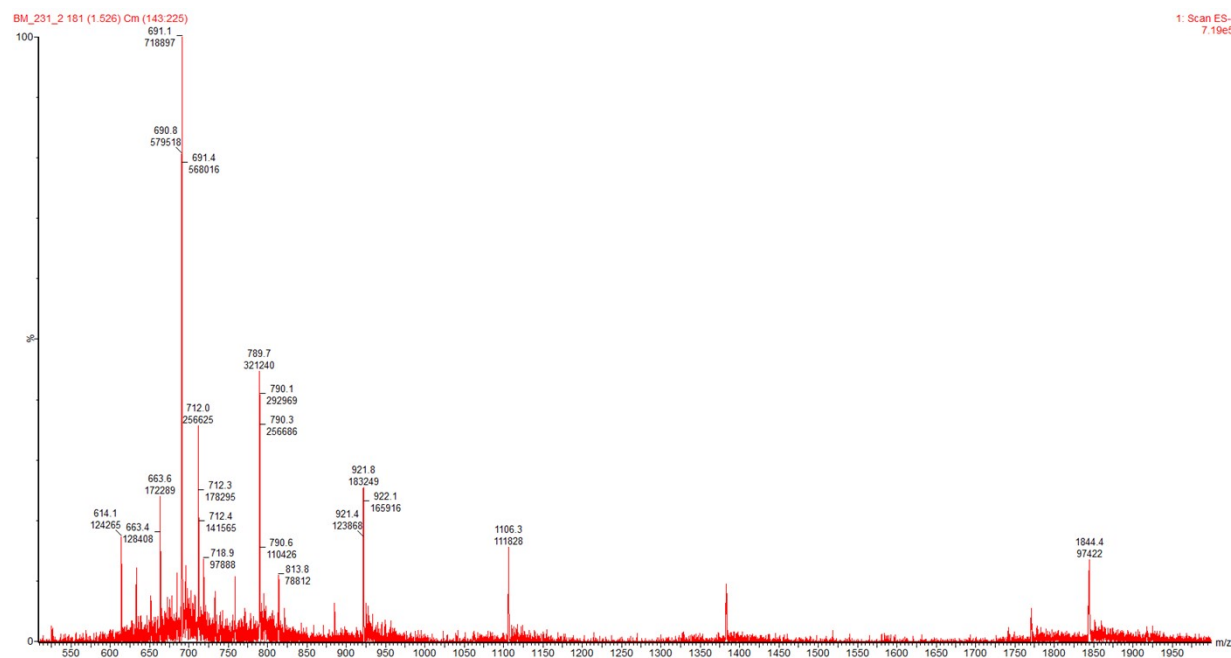

Raw MS of compound 39.



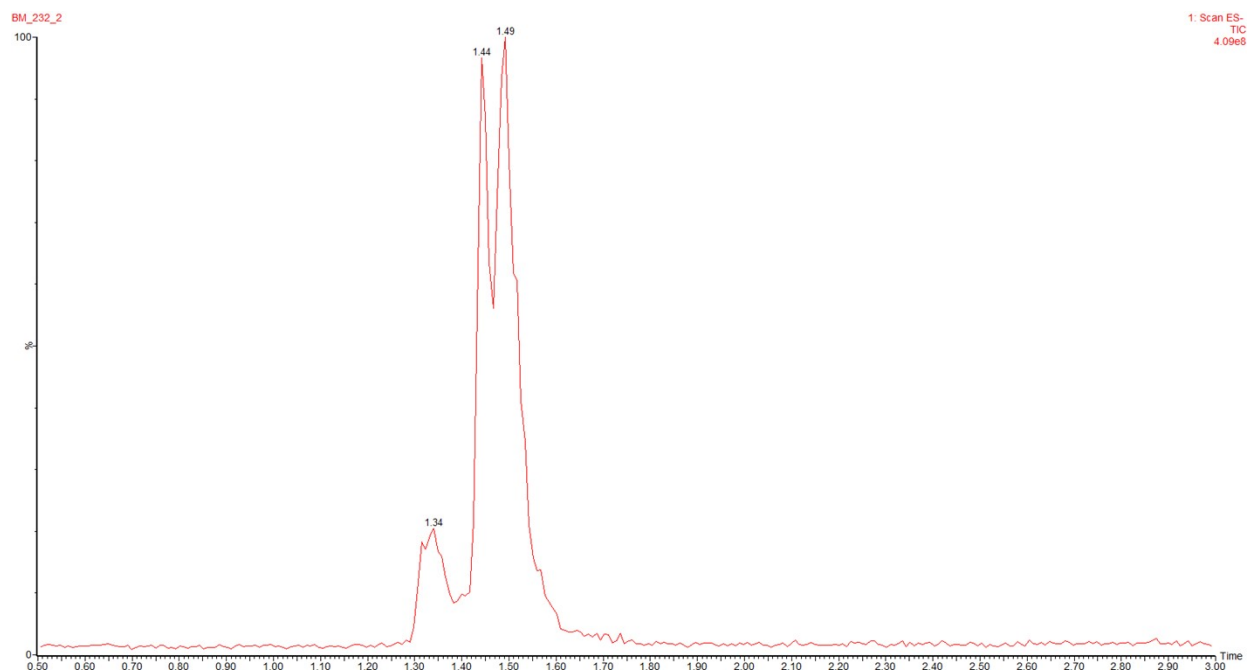

TIC of compound 40.

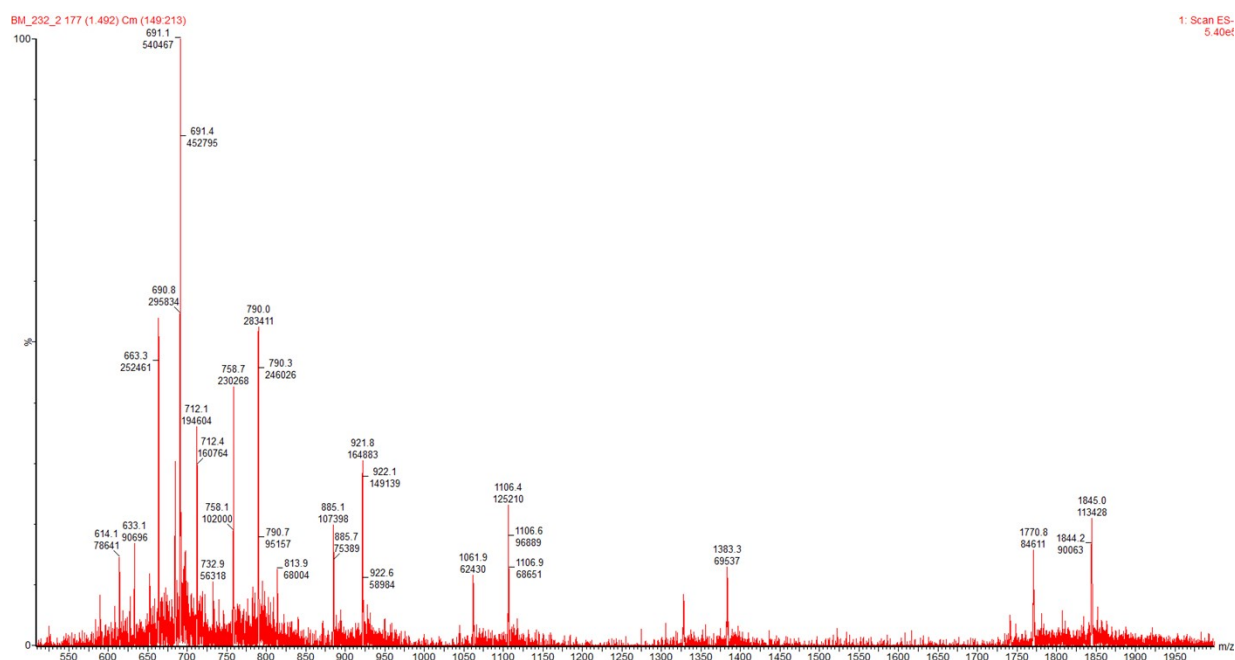

Raw MS of compound 40.

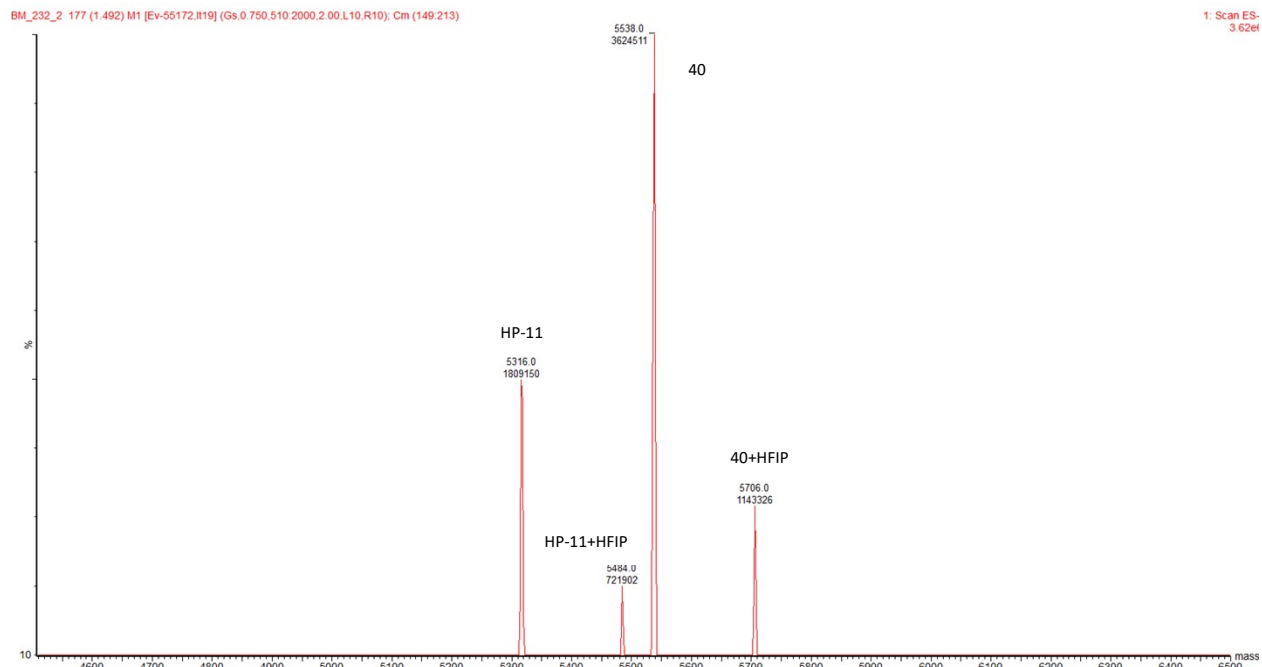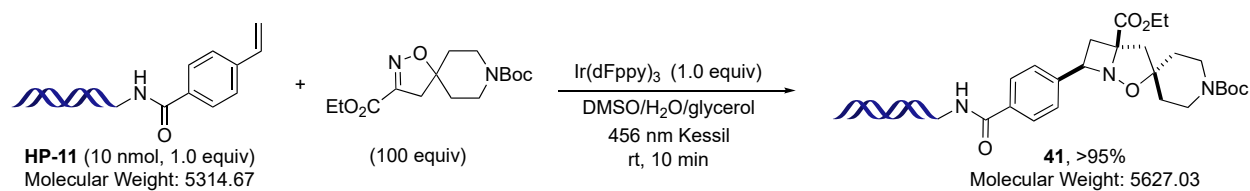

The title compound **41** was synthesized according to **GP-IV** from 8-(*tert*-butyl) 3-ethyl 1-oxa-2,8-diazaspiro[4.5]dec-2-ene-3,8-dicarboxylate and the DNA-tagged alkene **HP-11**. The product was formed with >95% conversion.

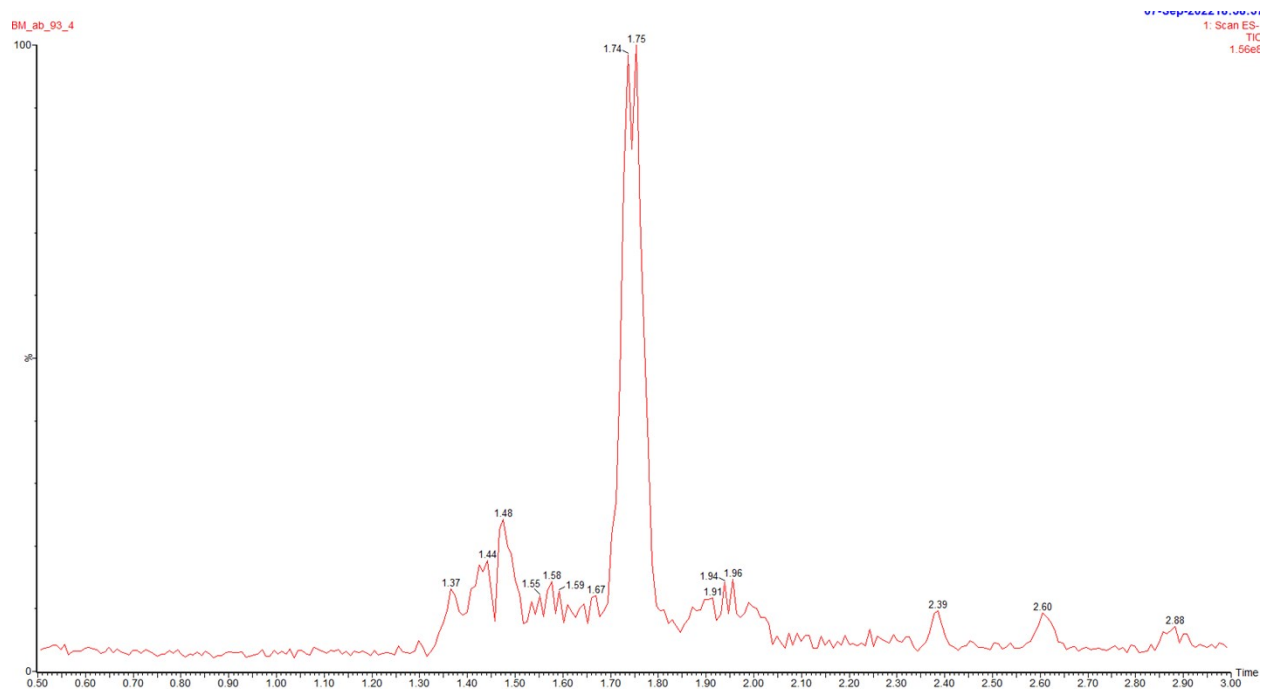

TIC of compound 41.

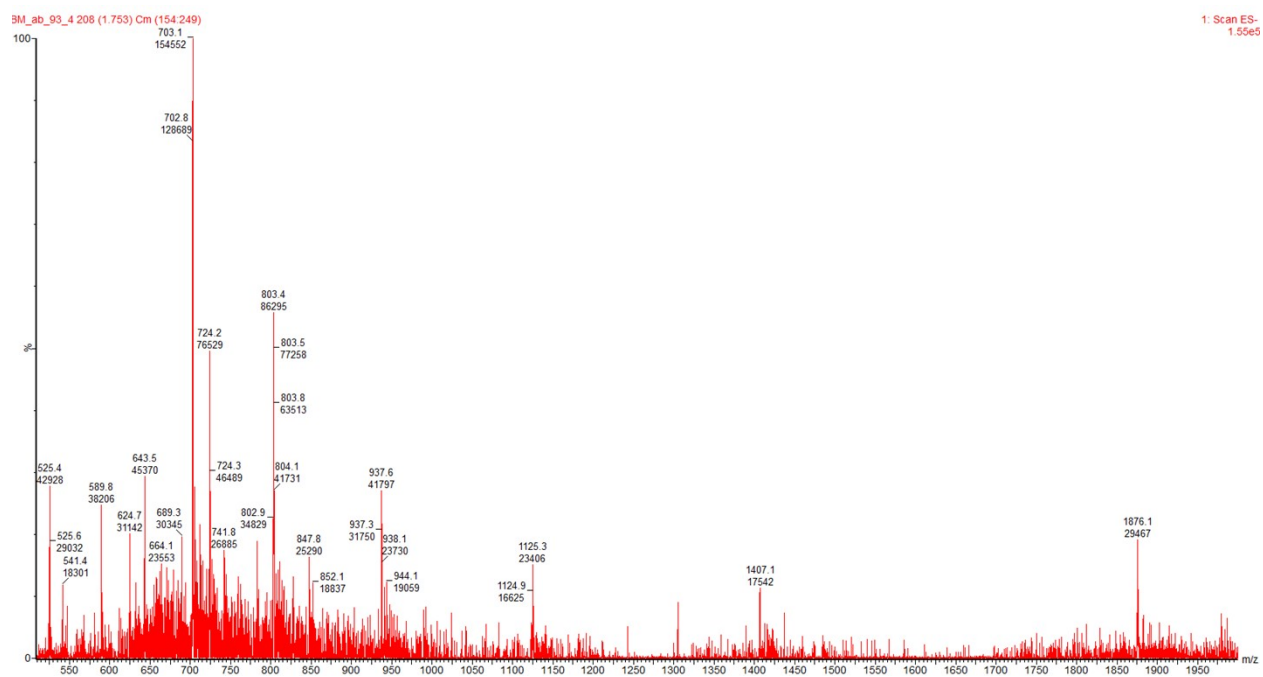

Raw MS of compound 41.

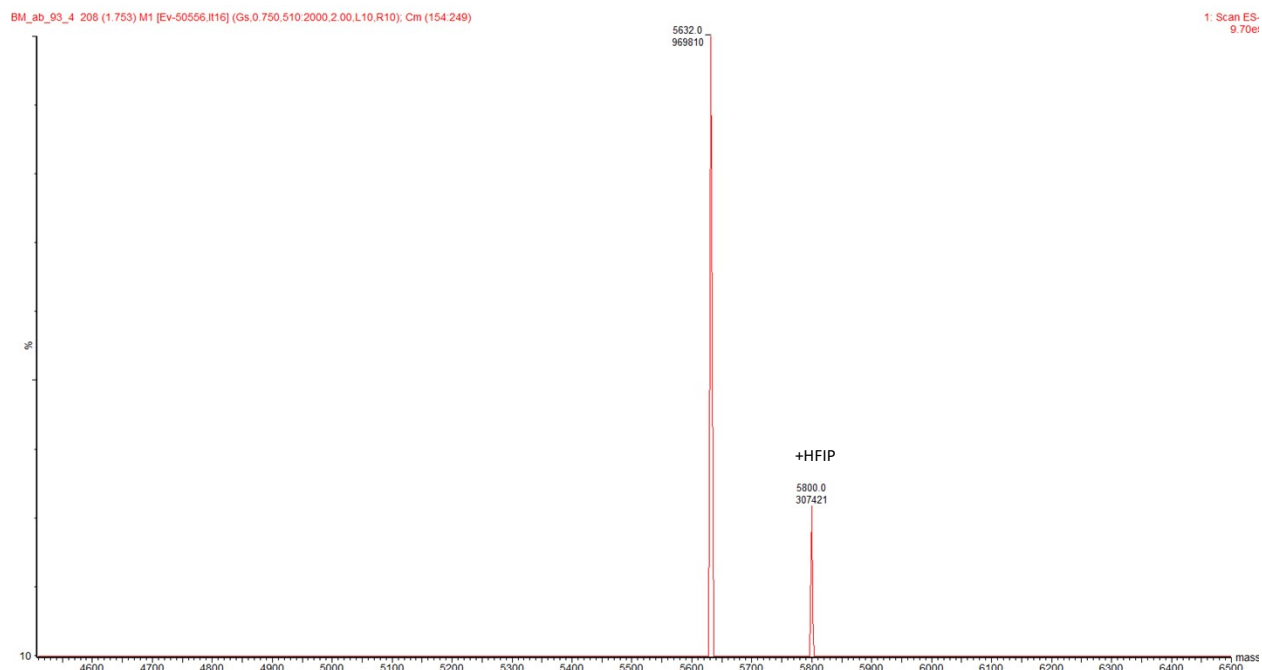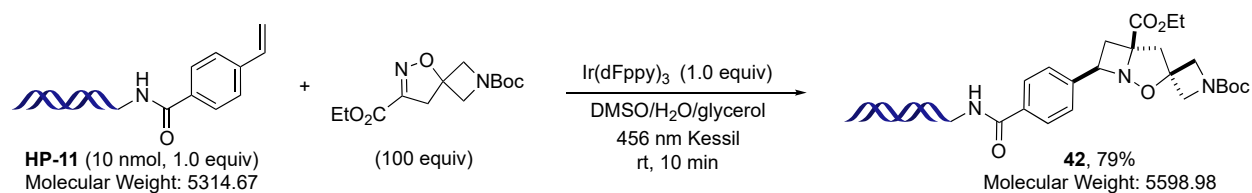

The title compound **42** was synthesized according to **GP-IV** from 2-(*tert*-butyl) 7-ethyl 5-oxa-2,6-diazaspiro[3.4]oct-6-ene-2,7-dicarboxylate and the DNA-tagged alkene **HP-11**. The product was formed with 79% conversion (21% recovered **HP-11**).

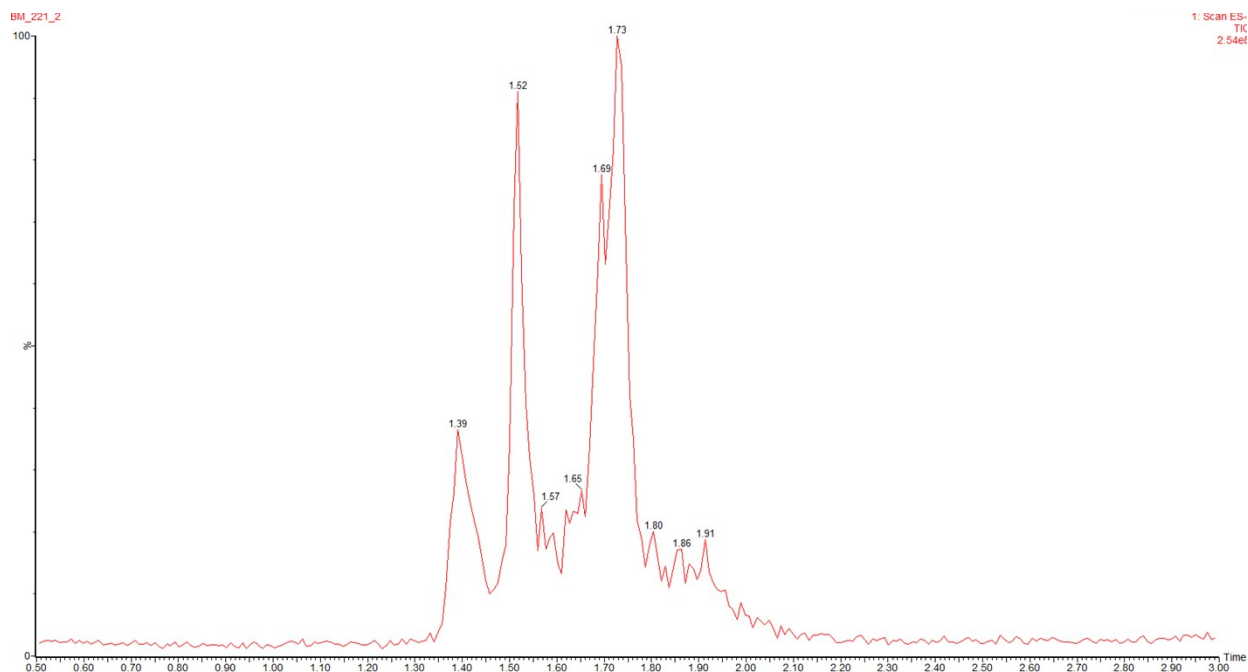

TIC of compound 42.

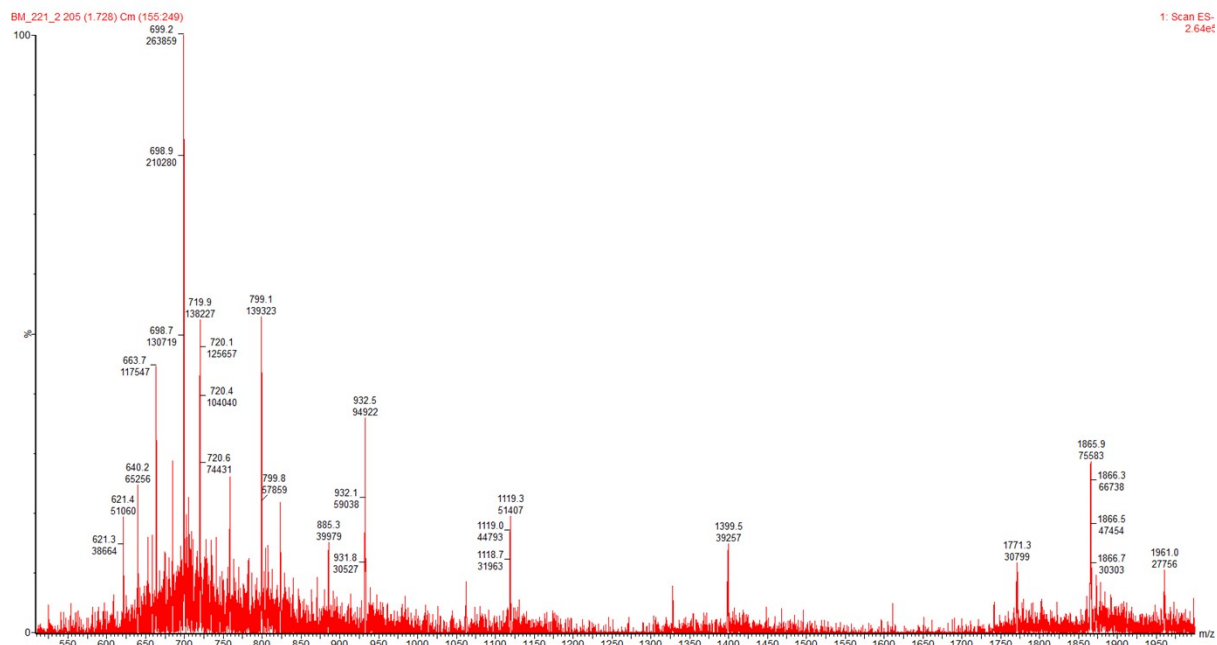

Raw MS of compound 42.

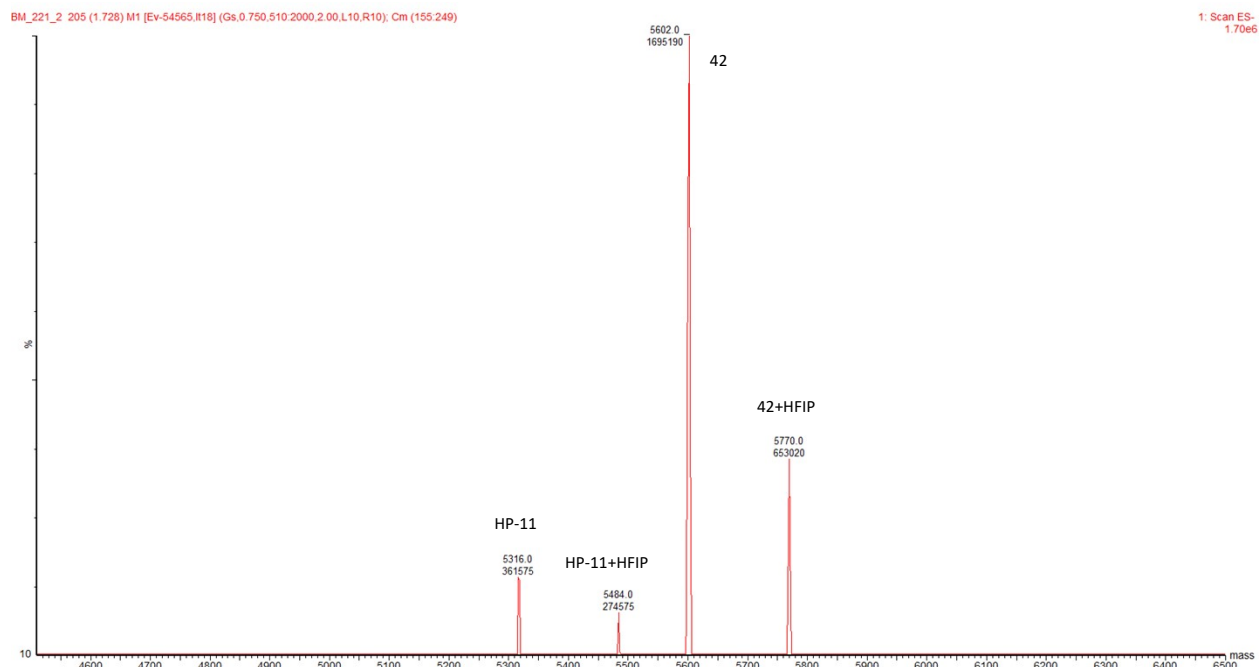

Deconvoluted MS of 42 (mass signals >10% of peak height).

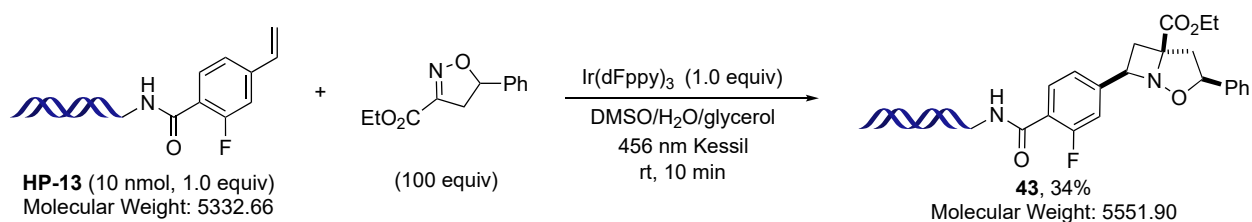

The title compound **43** was synthesized according to **GP-IV** from ethyl 5-phenyl-4,5-dihydroisoxazole-3-carboxylate and the DNA-tagged alkene **HP-13**. The product was formed with 34% yield.

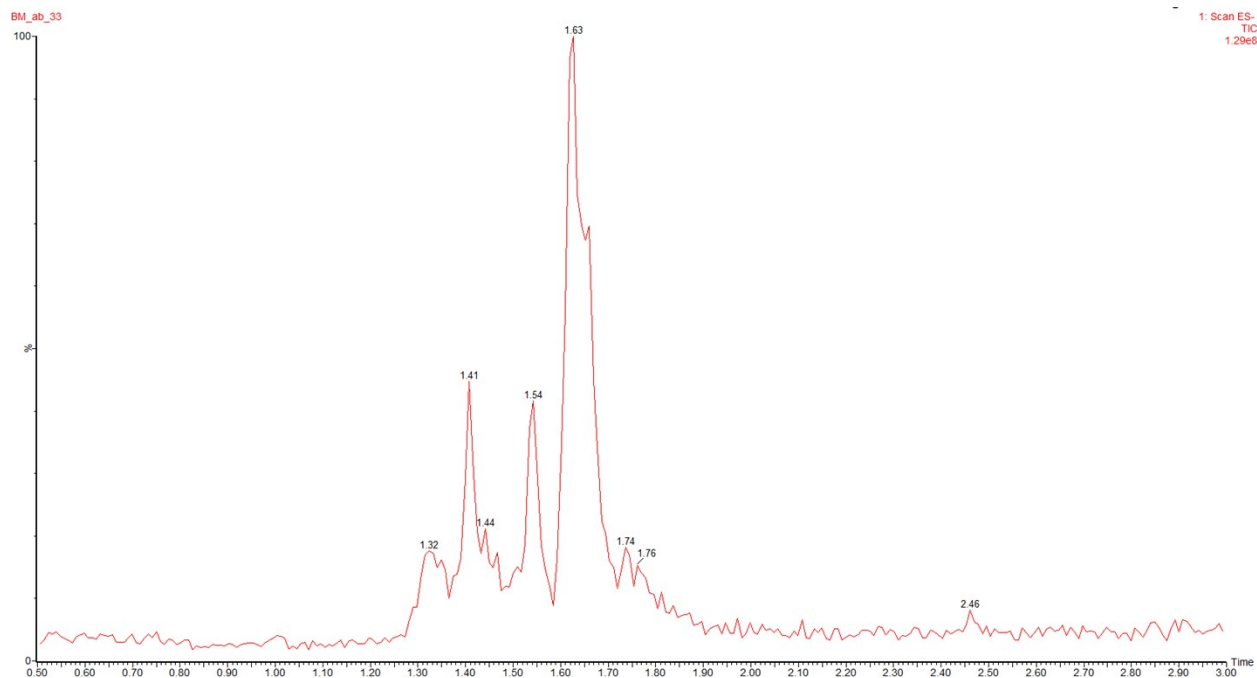

TIC of compound 43.

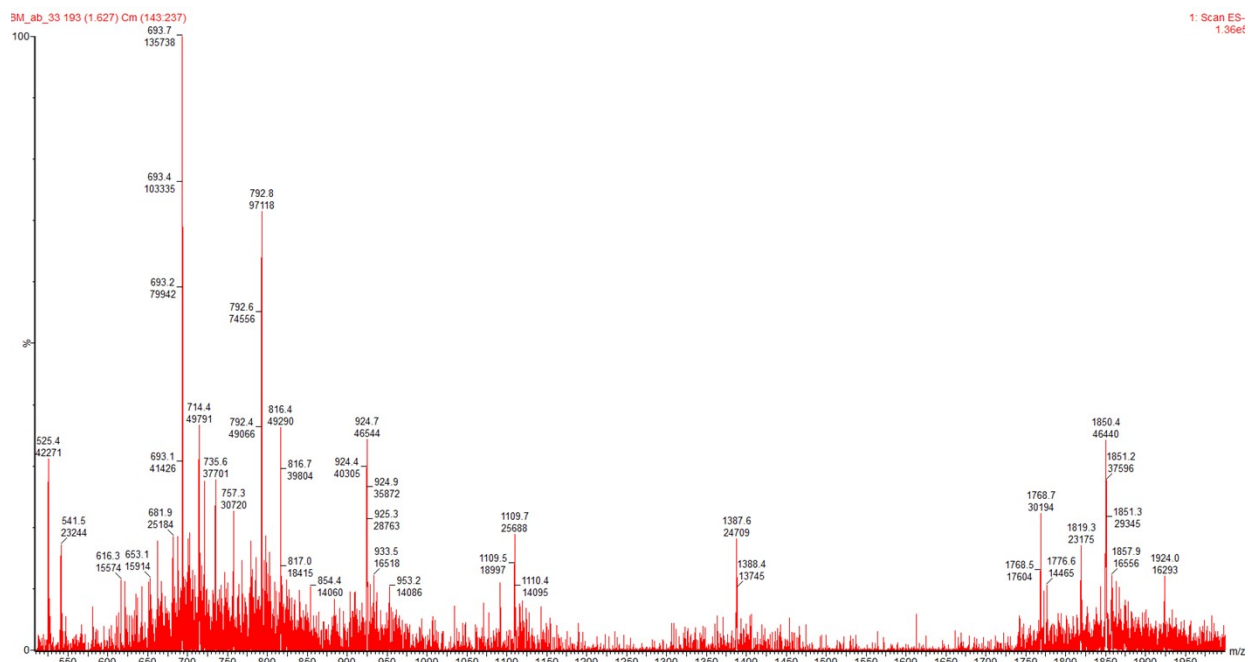

Raw MS of compound 43.

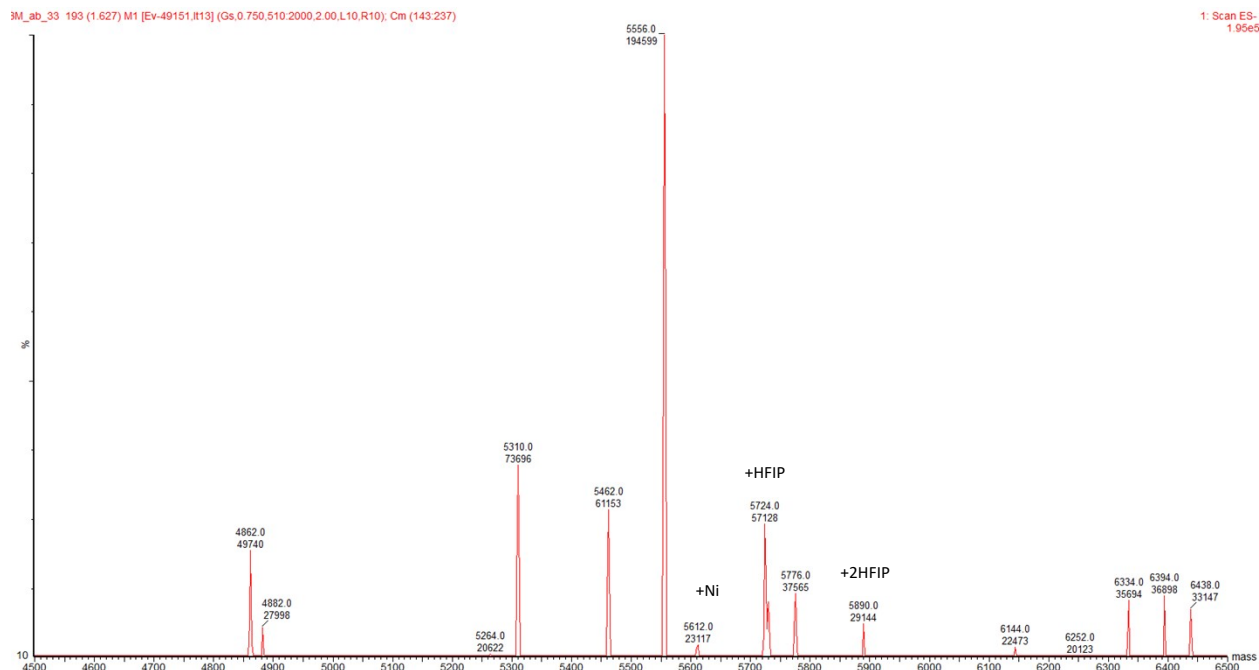

Deconvoluted MS of 43 (mass signals >10% of peak height).

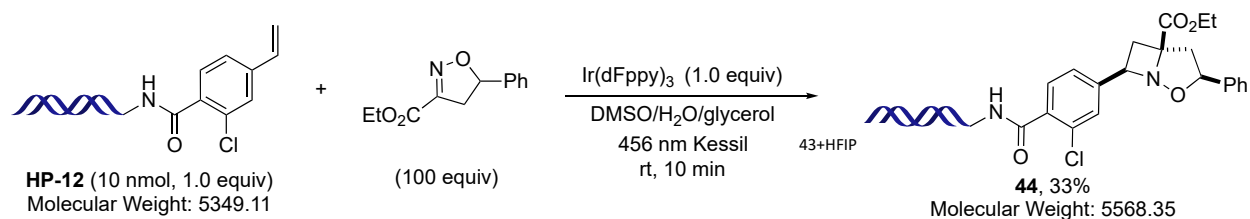

The title compound **44** was synthesized according to **GP-IV** from ethyl 5-phenyl-4,5-dihydroisoxazole-3-carboxylate and the DNA-tagged alkene **HP-12**. The product was formed with 33% conversion.

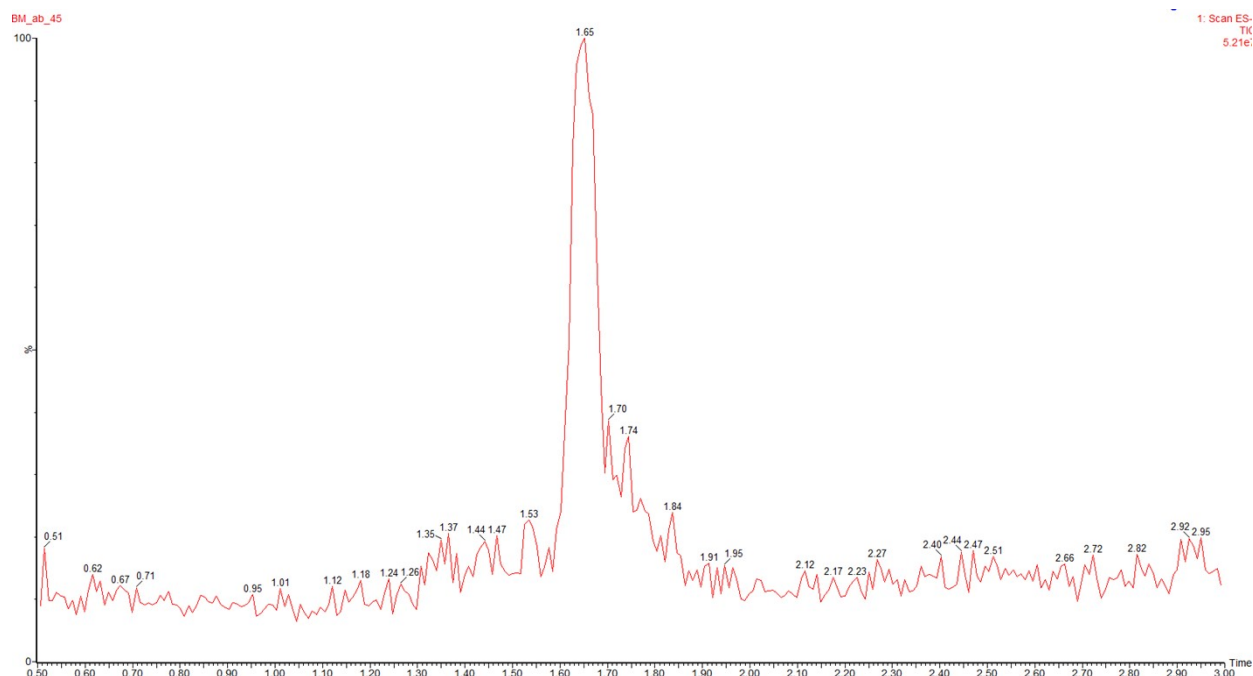

TIC of compound 44.

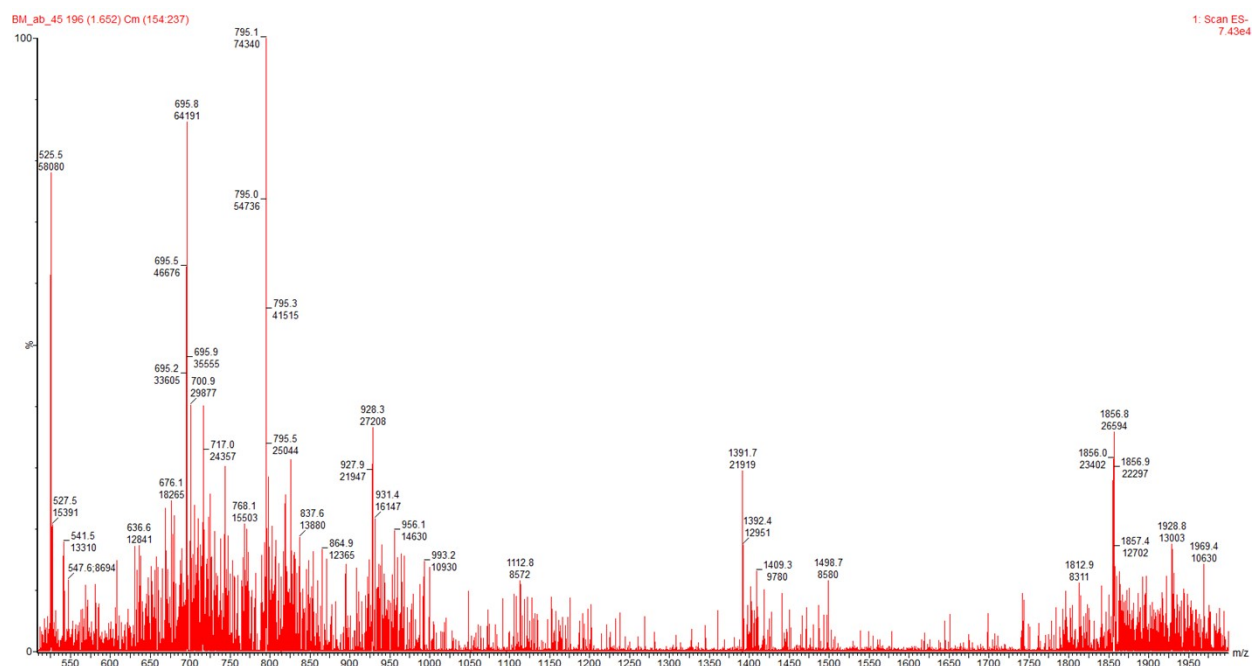

Raw MS of compound 44.

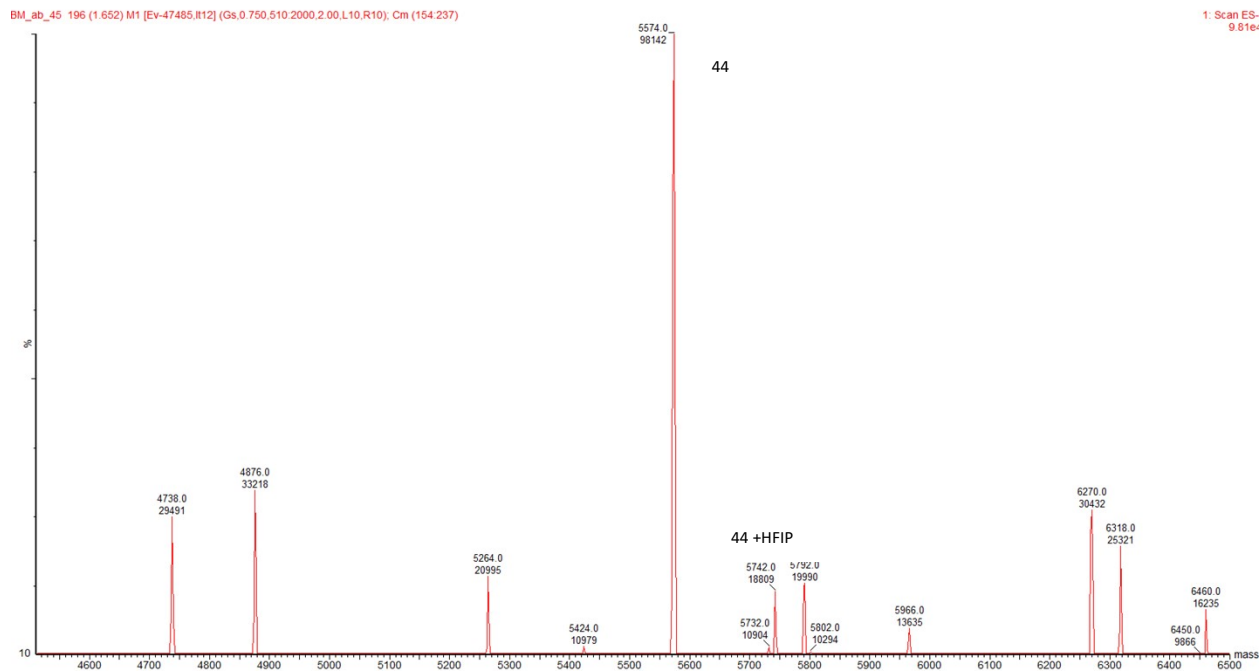

Deconvoluted MS of 44 (mass signals >10% of peak height).

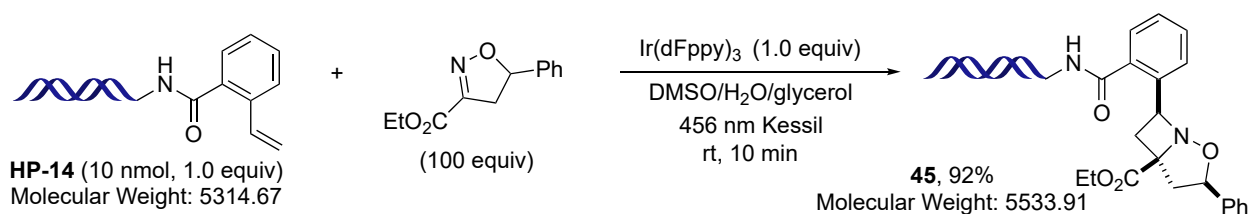

The title compound **45** was synthesized according to **GP-IV** from ethyl 5-phenyl-4,5-dihydroisoxazole-3-carboxylate and the DNA-tagged alkene **HP-14**. The product was formed with 92% yield.

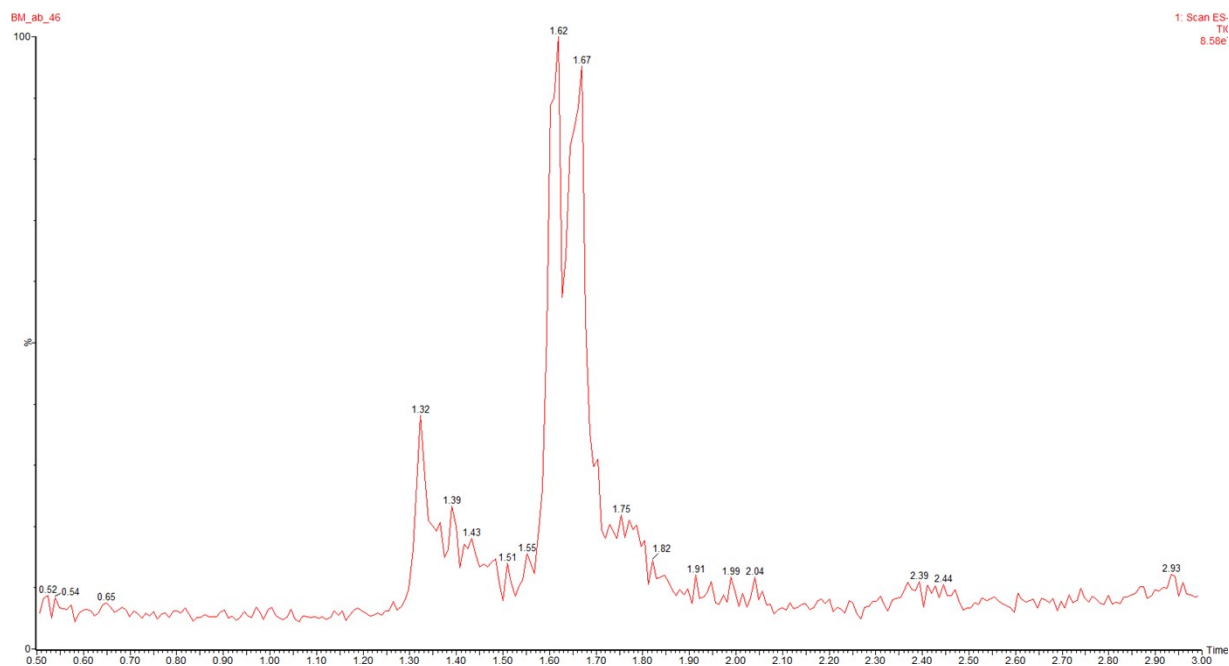

TIC of compound 45.

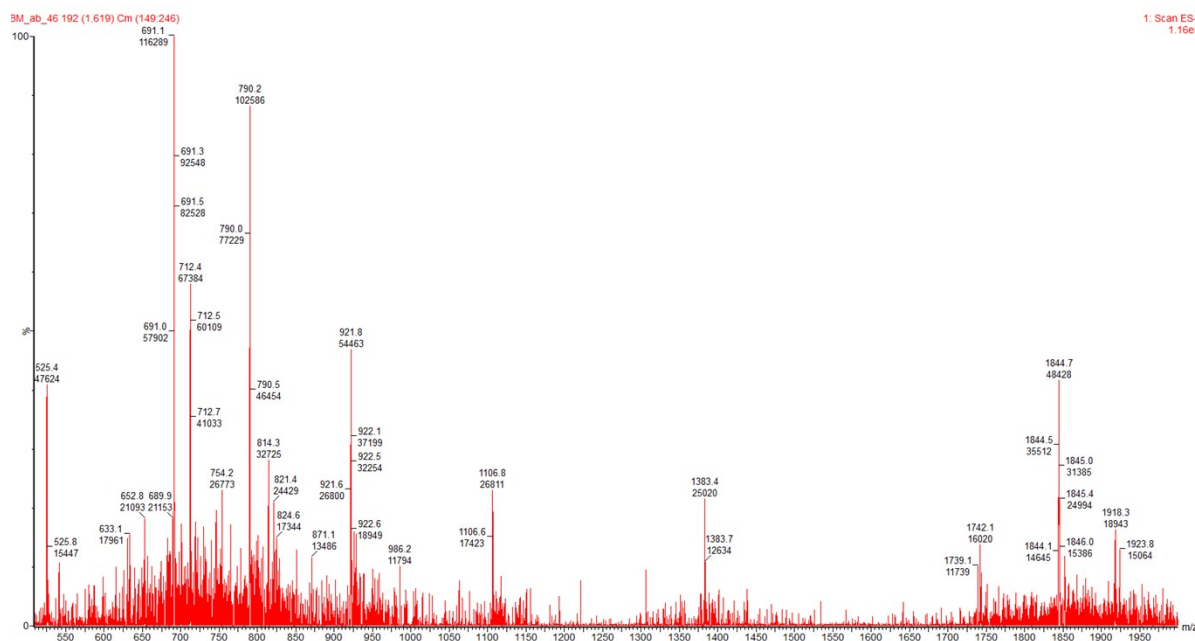

Raw MS of compound 45.

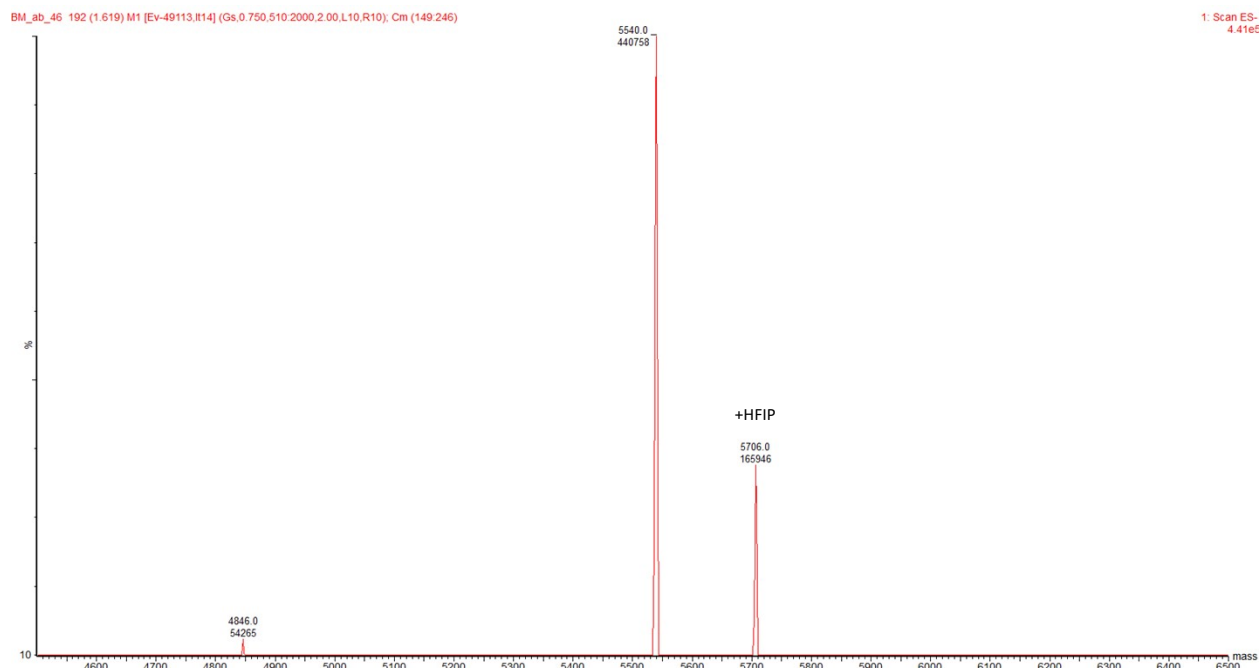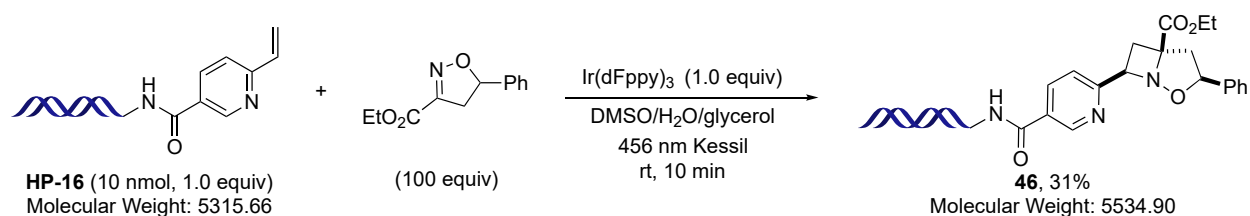

The title compound **46** was synthesized according to **GP-IV** from ethyl 5-phenyl-4,5-dihydroisoxazole-3-carboxylate and the DNA-tagged alkene **HP-16**. The product was formed with 31% conversion.

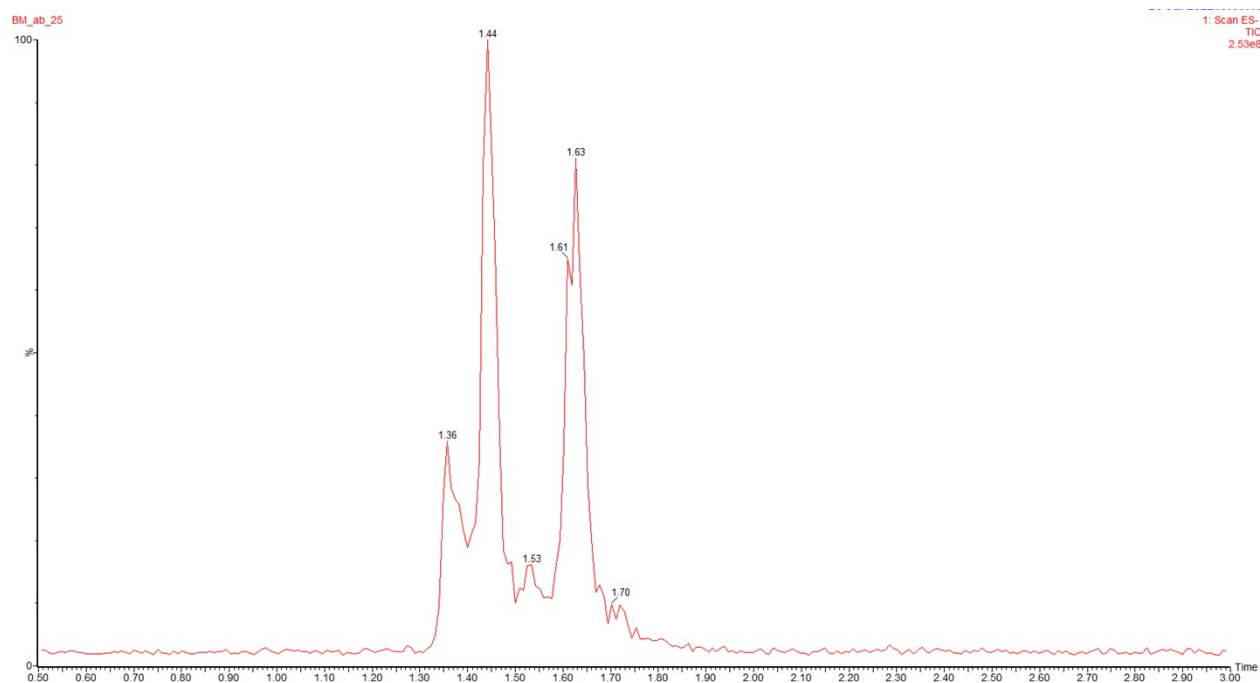

TIC of compound 46.

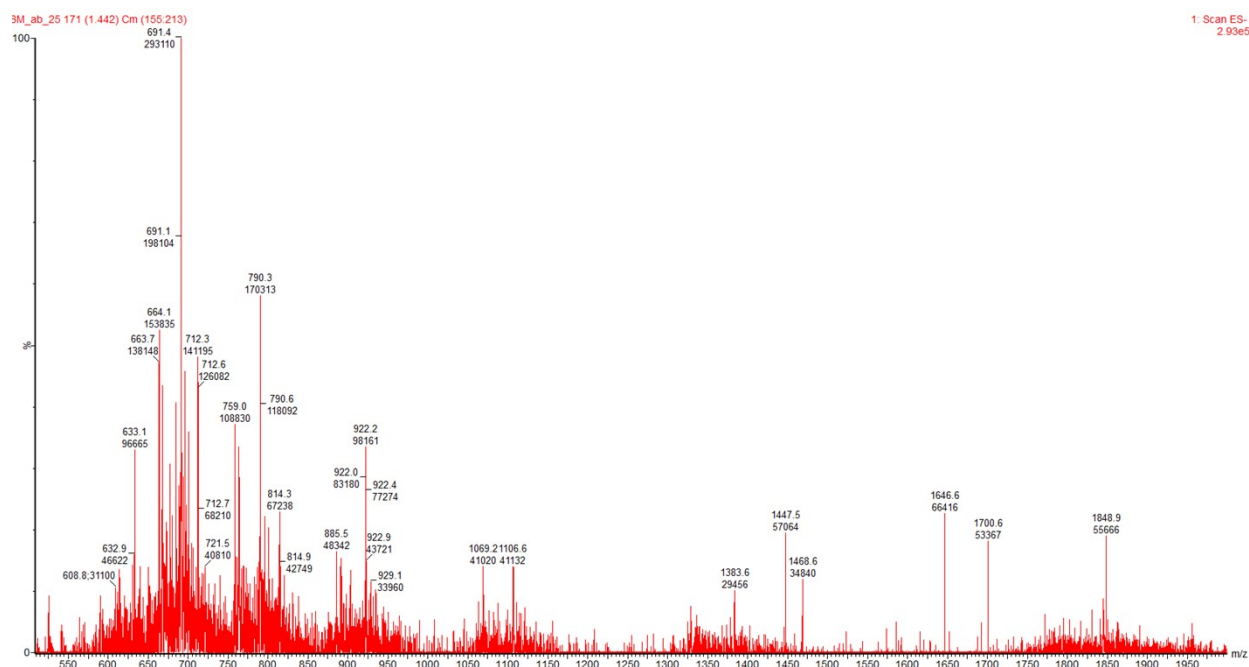

Raw MS of compound 46.

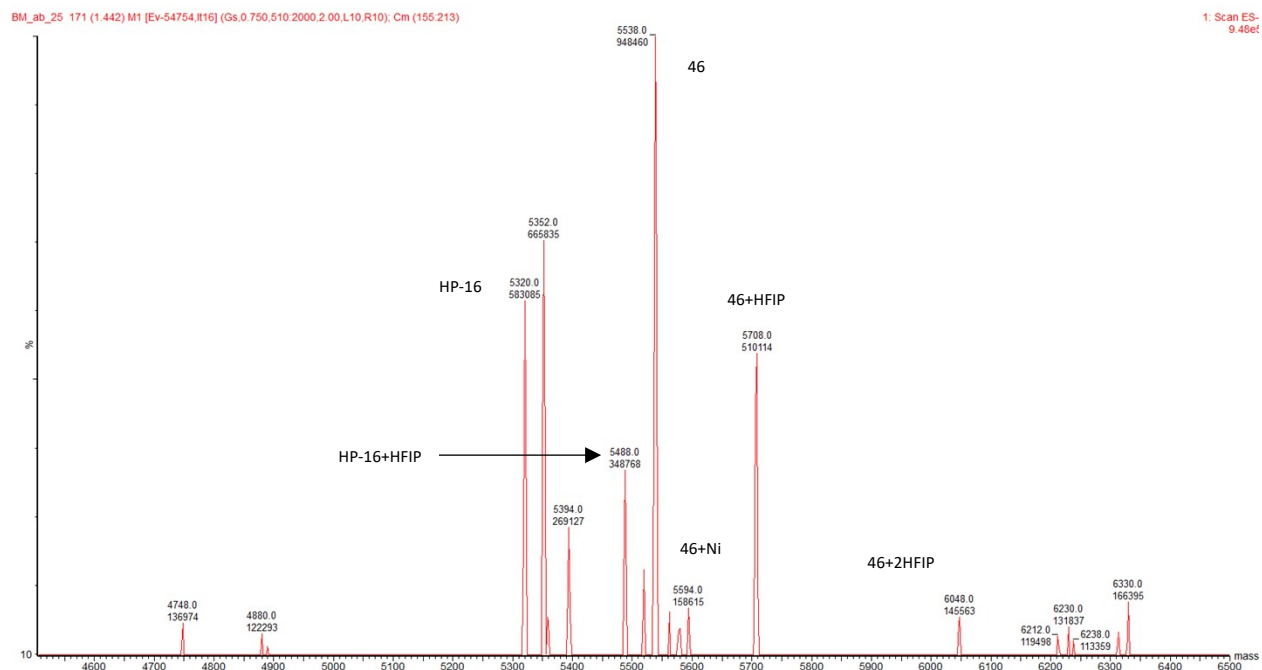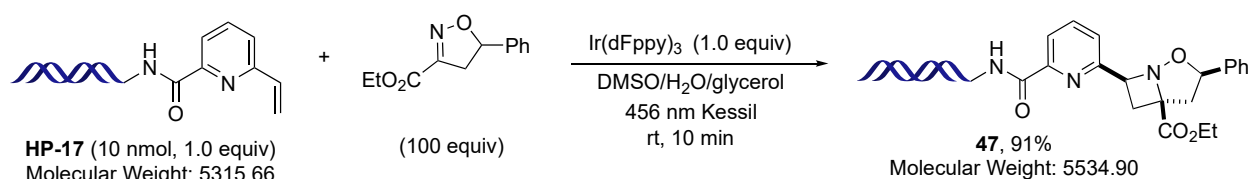

The title compound **47** was synthesized according to **GP-IV** from ethyl 5-phenyl-4,5-dihydroisoxazole-3-carboxylate and the DNA-tagged alkene **HP-17**. The product was formed with 91% conversion.

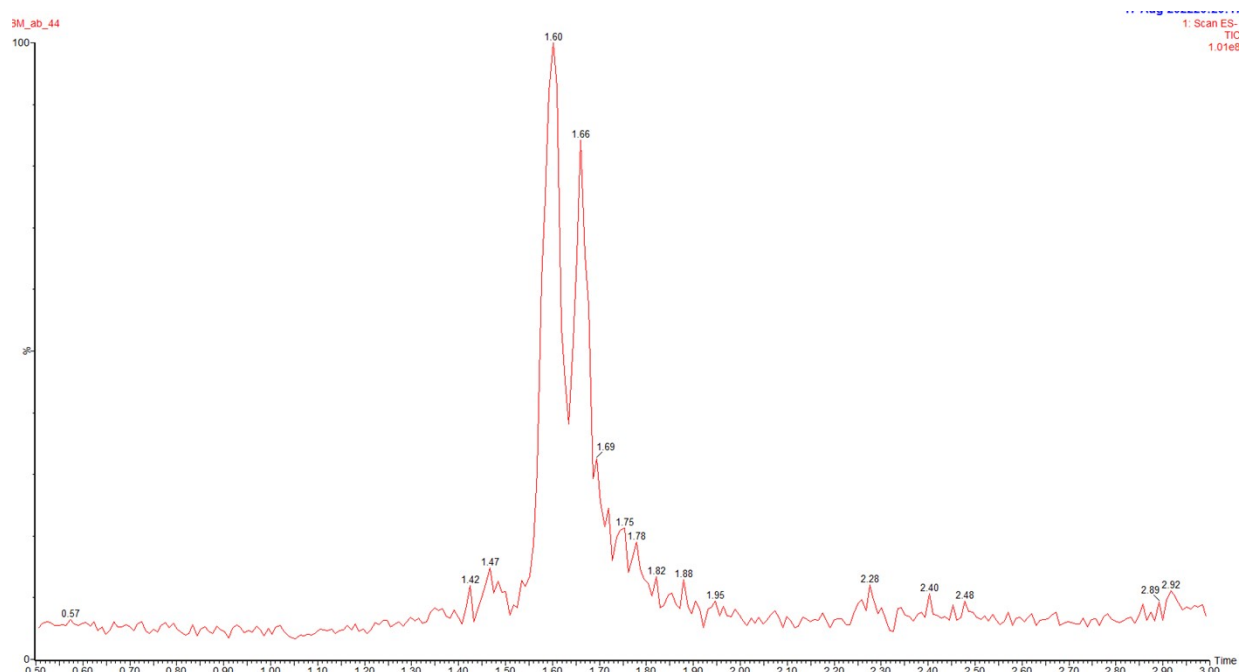

TIC of compound 47.

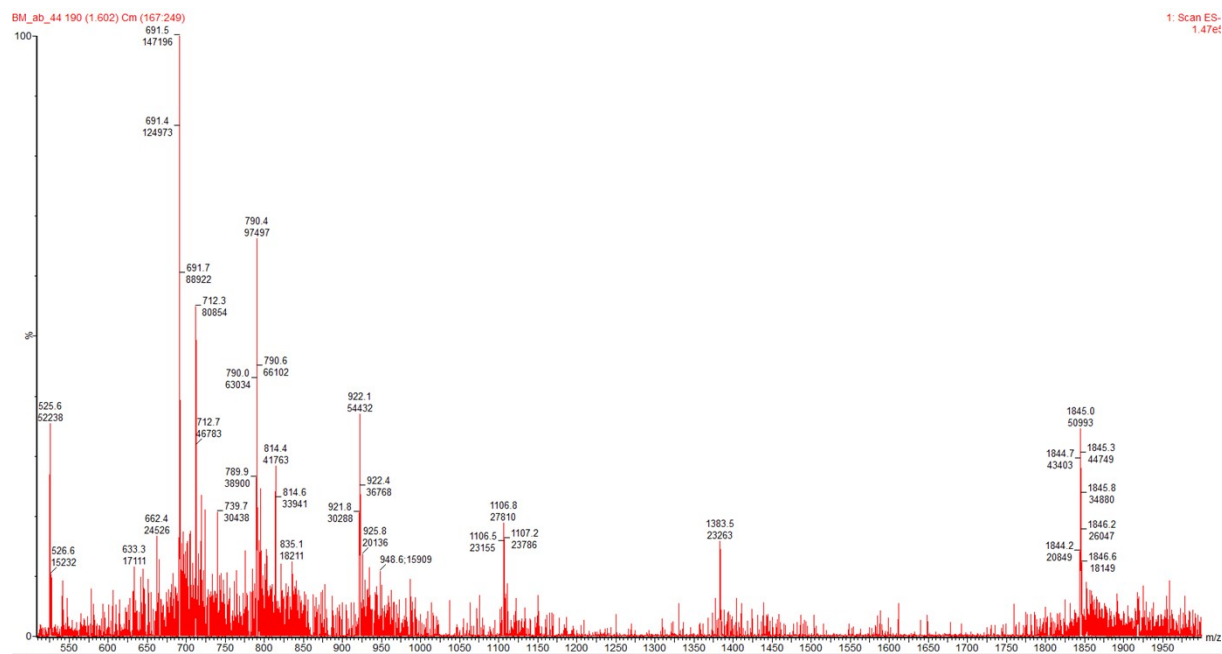

Raw MS of compound 47.

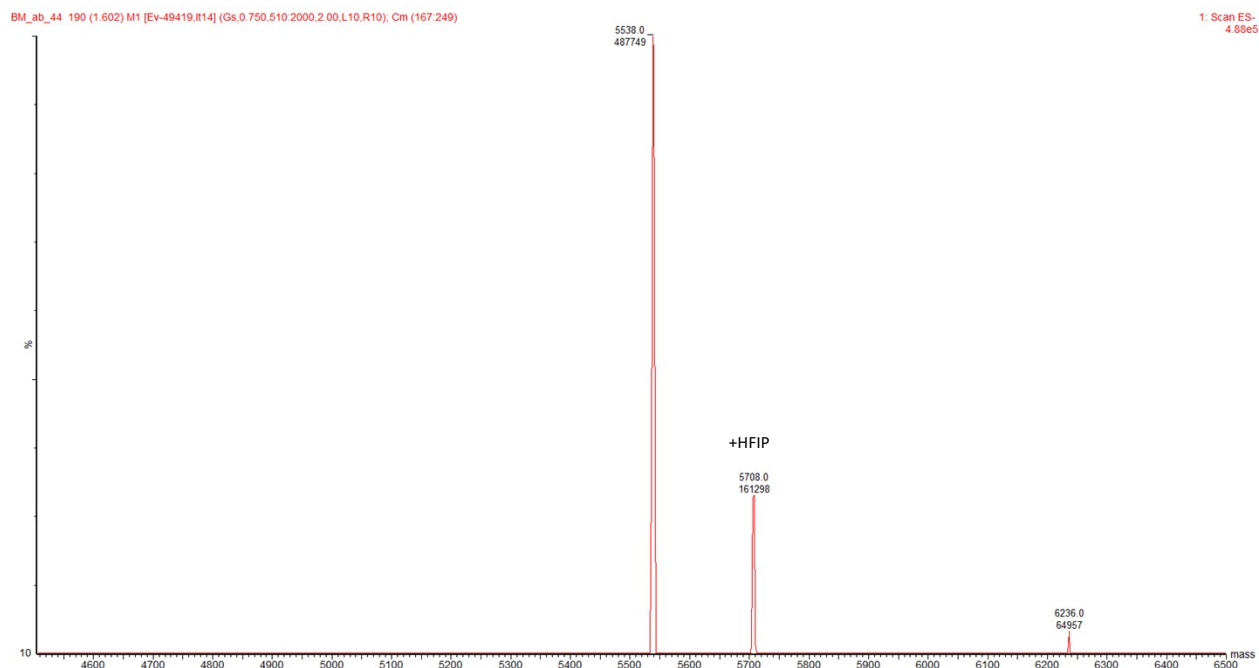

Deconvoluted MS of 47 (mass signals >10% of peak height).

## UPLC/MS Spectra: Additional Scope of 2-Oxa-1-azaspiro(bicyclo[3.2.0])heptanes On-DNA

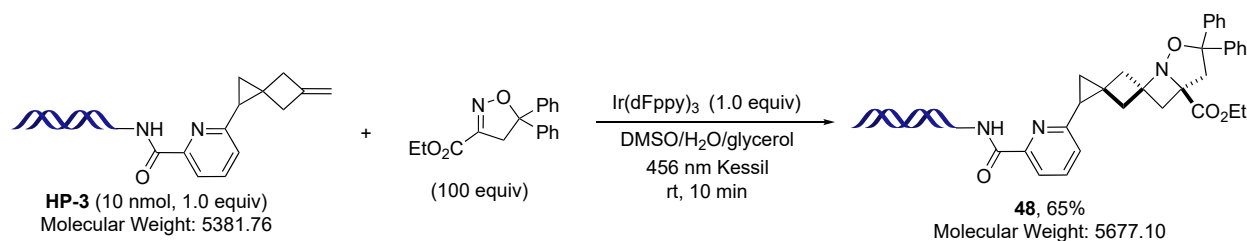

The title compound **48** was synthesized according to **GP-IV** from ethyl 5,5-diphenyl-4,5-dihydroisoxazole-3-carboxylate and the DNA-tagged alkene **HP-3**. The product was formed with 65% conversion (10% recovered **HP-3**).

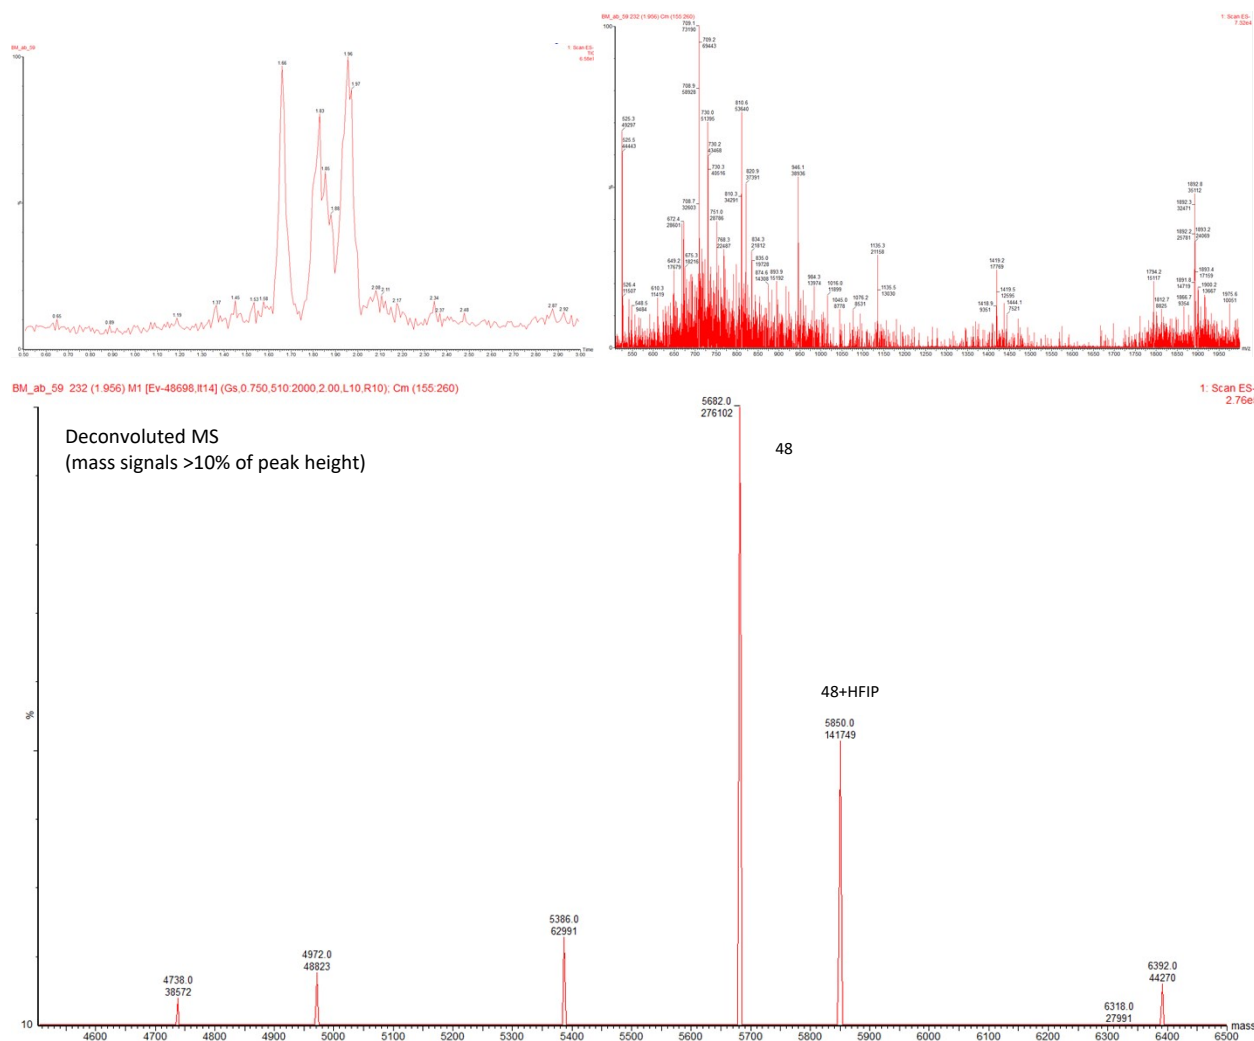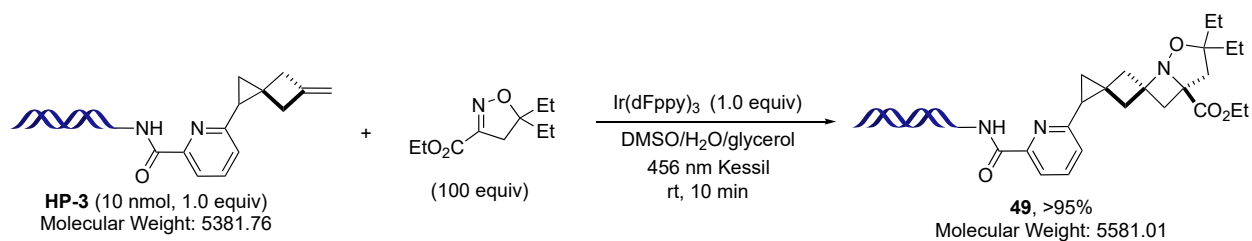

The title compound **49** was synthesized according to **GP-IV** from ethyl 5,5-diethyl-4,5-dihydroisoxazole-3-carboxylate and the DNA-tagged alkene **HP-3**. The product was formed with >95% conversion.

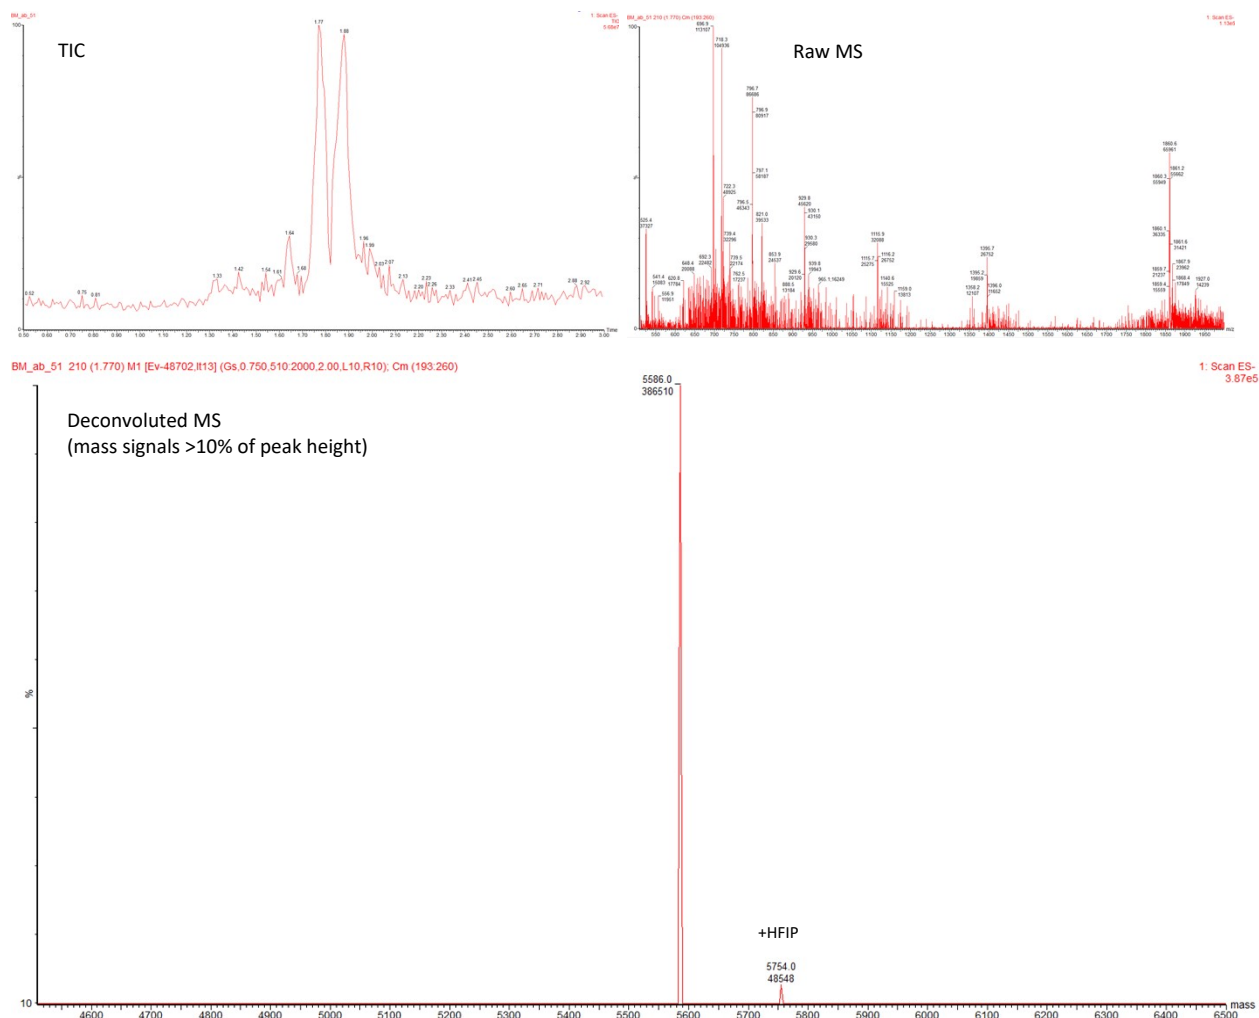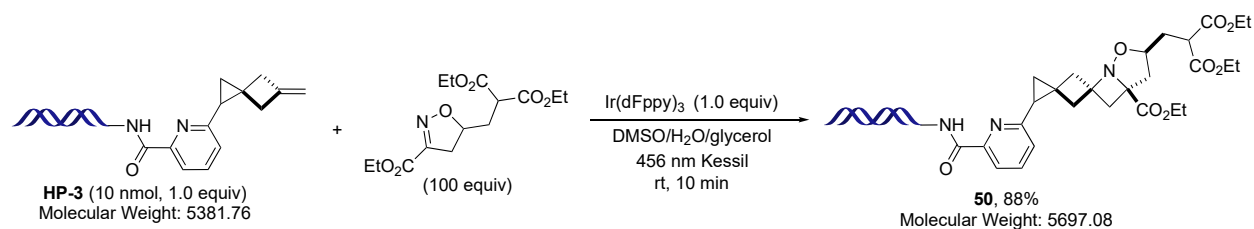

The title compound **50** was synthesized according to **GP-IV** from diethyl 2-((3-(ethoxycarbonyl)-4,5-dihydroisoxazol-5-yl)methyl)malonate and the DNA-tagged alkene **HP-3**. The product was formed with 88% conversion.

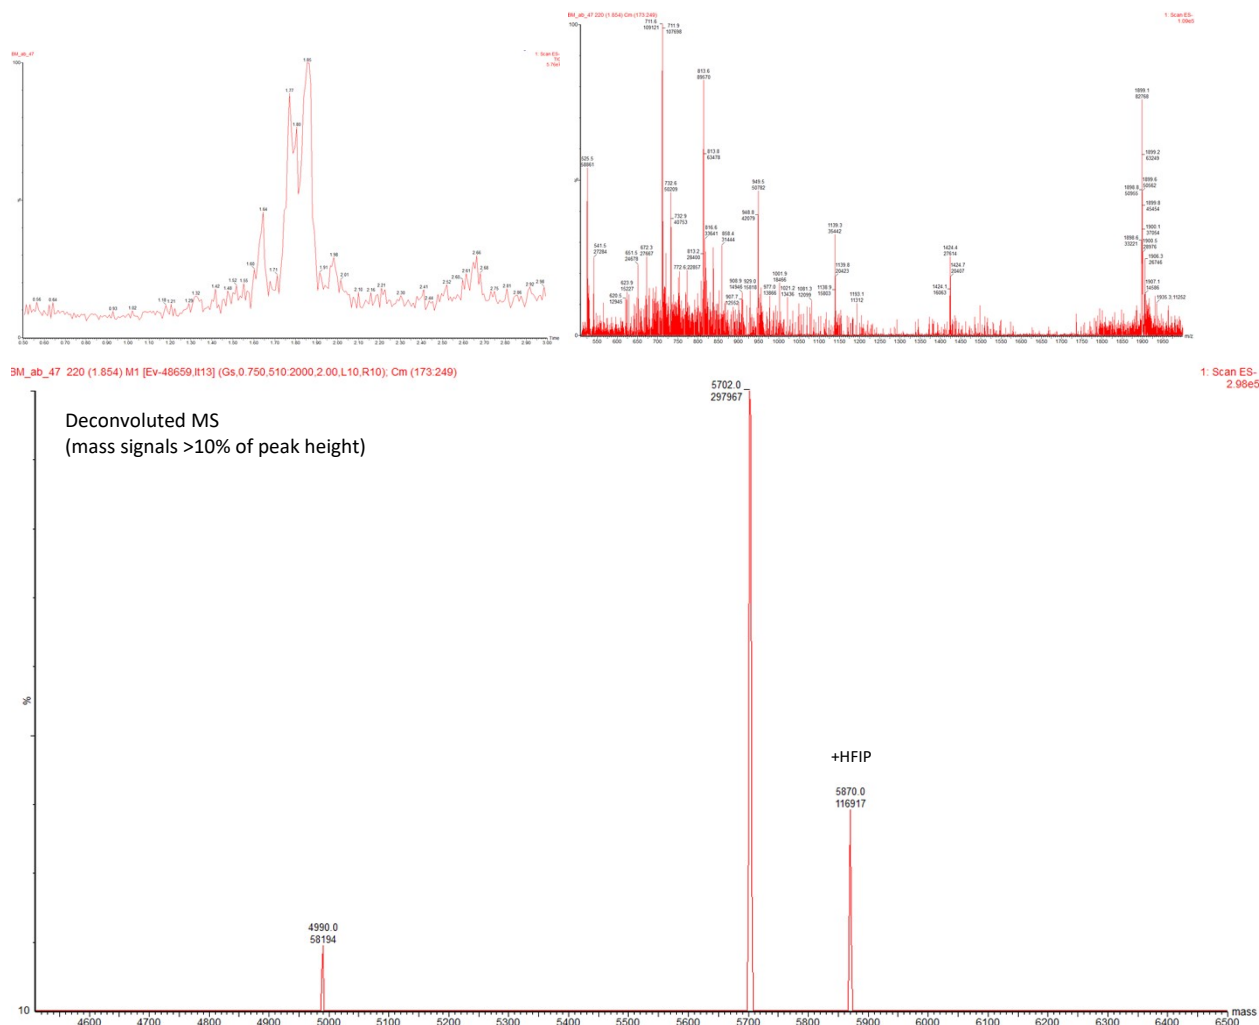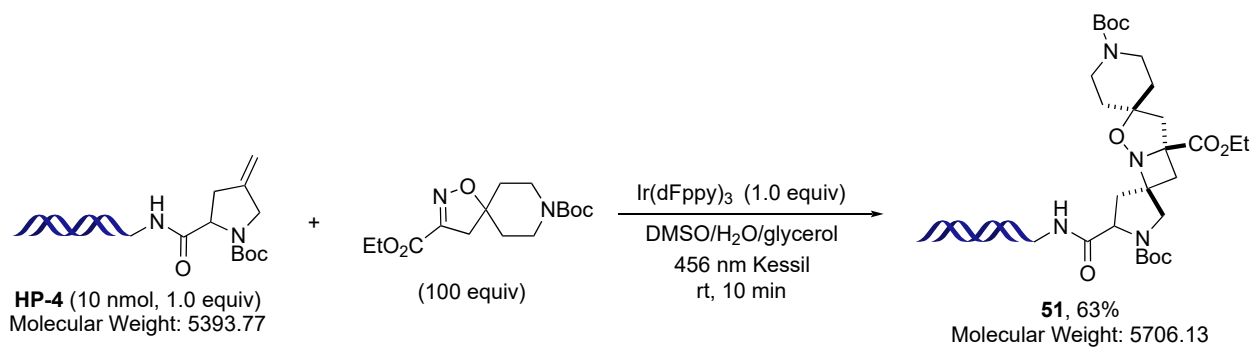

The title compound **51** was synthesized according to **GP-IV** from 8-(*tert*-butyl) 3-ethyl 1-oxa-2,8-diazaspiro[4.5]dec-2-ene-3,8-dicarboxylate and the DNA-tagged alkene **HP-4**. The product was formed with 63% conversion (7% recovered **HP-4**).

TIC

Raw MS



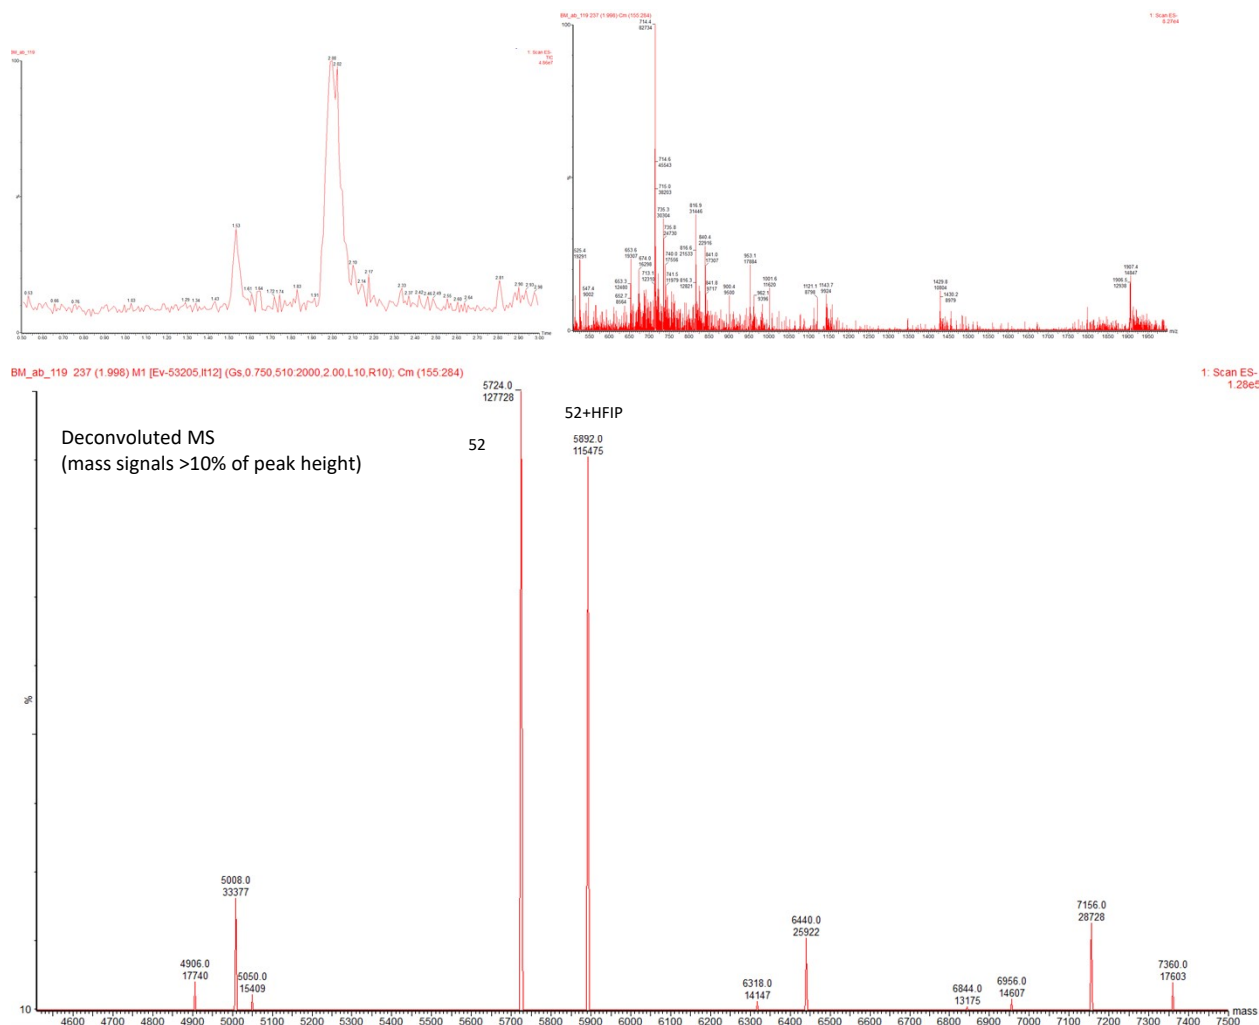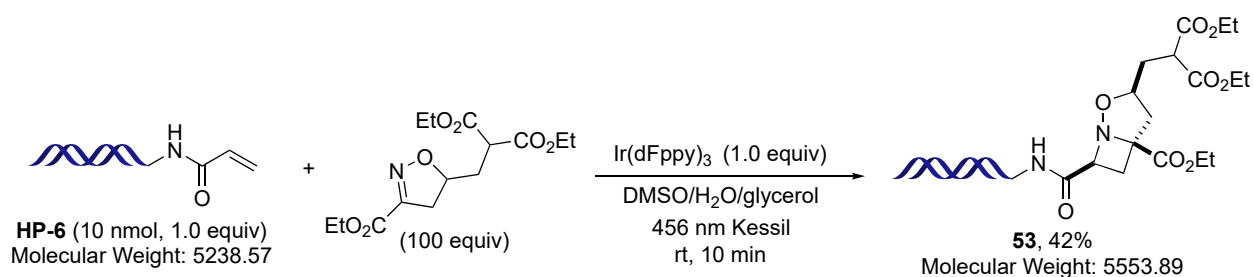

The title compound **37** was synthesized according to **GP-IV** from diethyl 2-((3-(ethoxycarbonyl)-4,5-dihydroisoxazol-5-yl)methyl)malonate and the DNA-tagged alkene **HP-6**. The product was formed with 42% conversion (13% recovered **HP-6**)

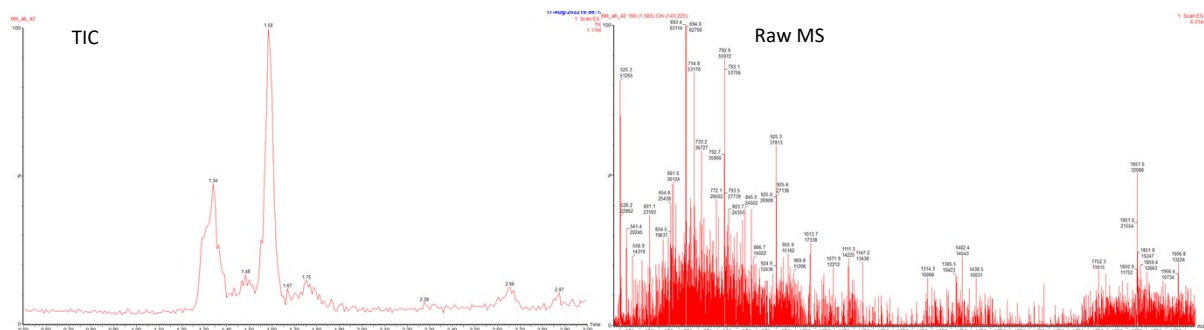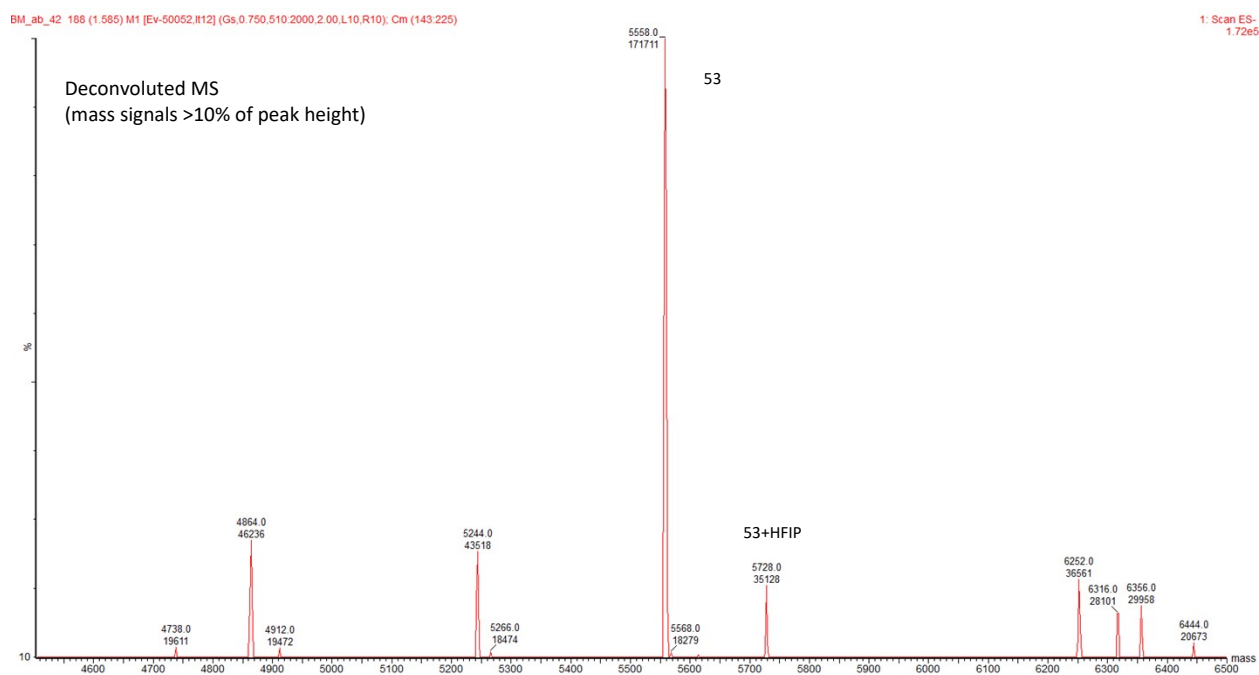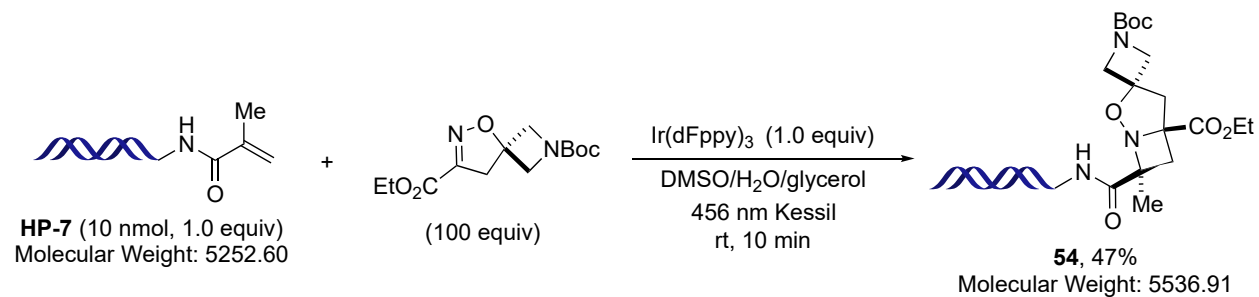

The title compound **41** was synthesized according to **GP-IV** from 2-(*tert*-butyl) 7-ethyl 5-oxa-2,6-diazaspiro[3.4]oct-6-ene-2,7-dicarboxylate and the DNA-tagged alkene **HP-7**. The product was formed with 47% conversion (53% recovered **HP-7**).

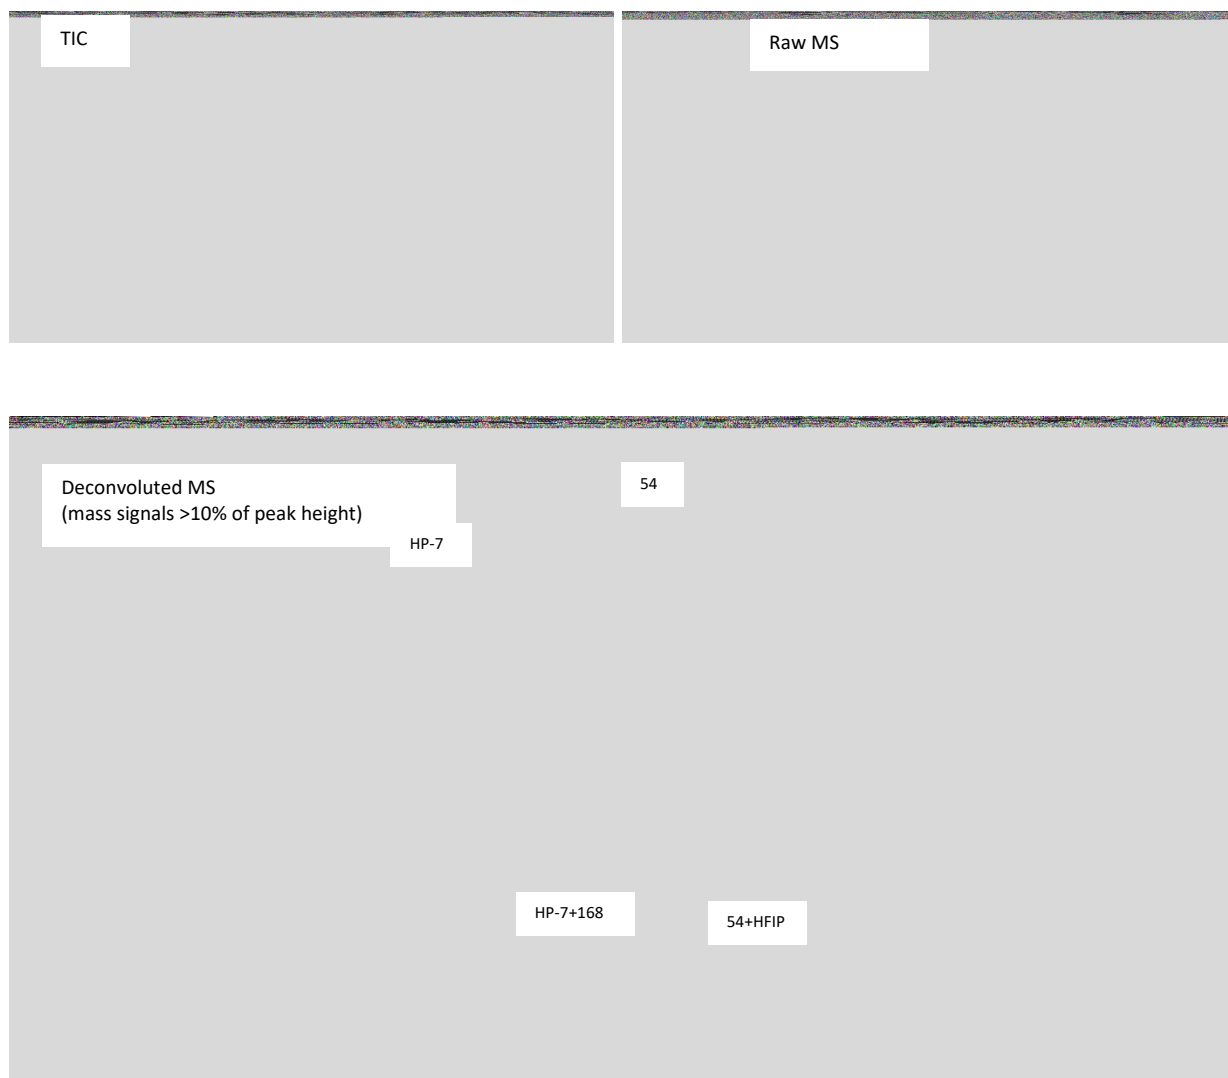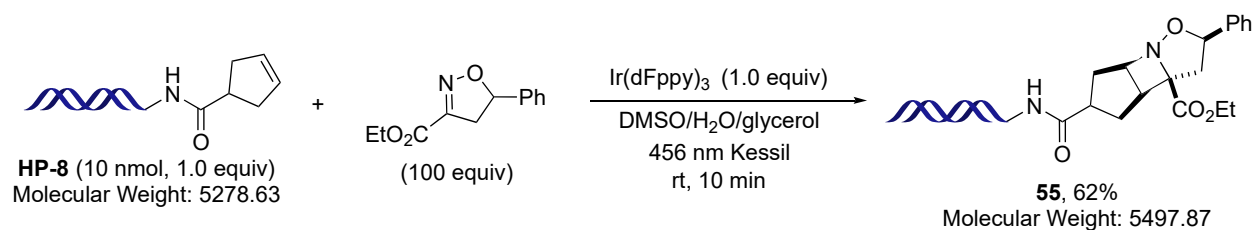

The title compound **55** was synthesized according to **GP-IV** from ethyl 5-phenyl-4,5-dihydroisoxazole-3-carboxylate and the DNA-tagged alkene **HP-8**. The product was formed with 62% conversion (38% recovered **HP-8**).



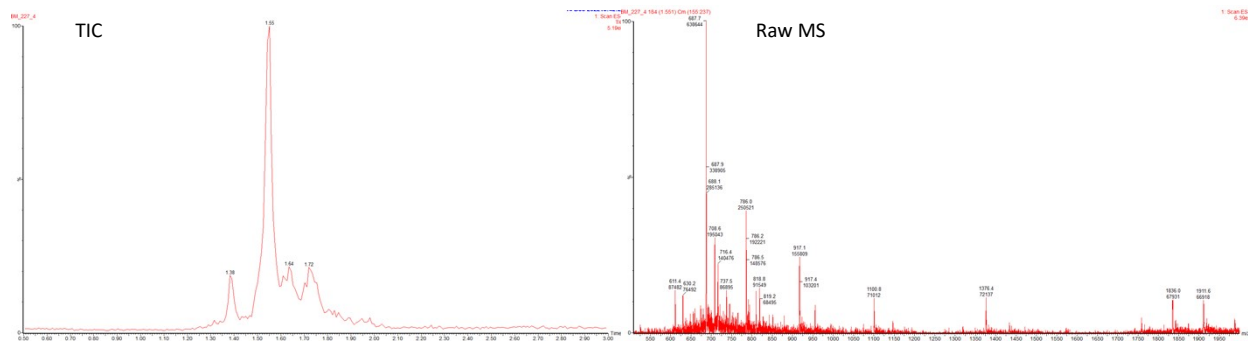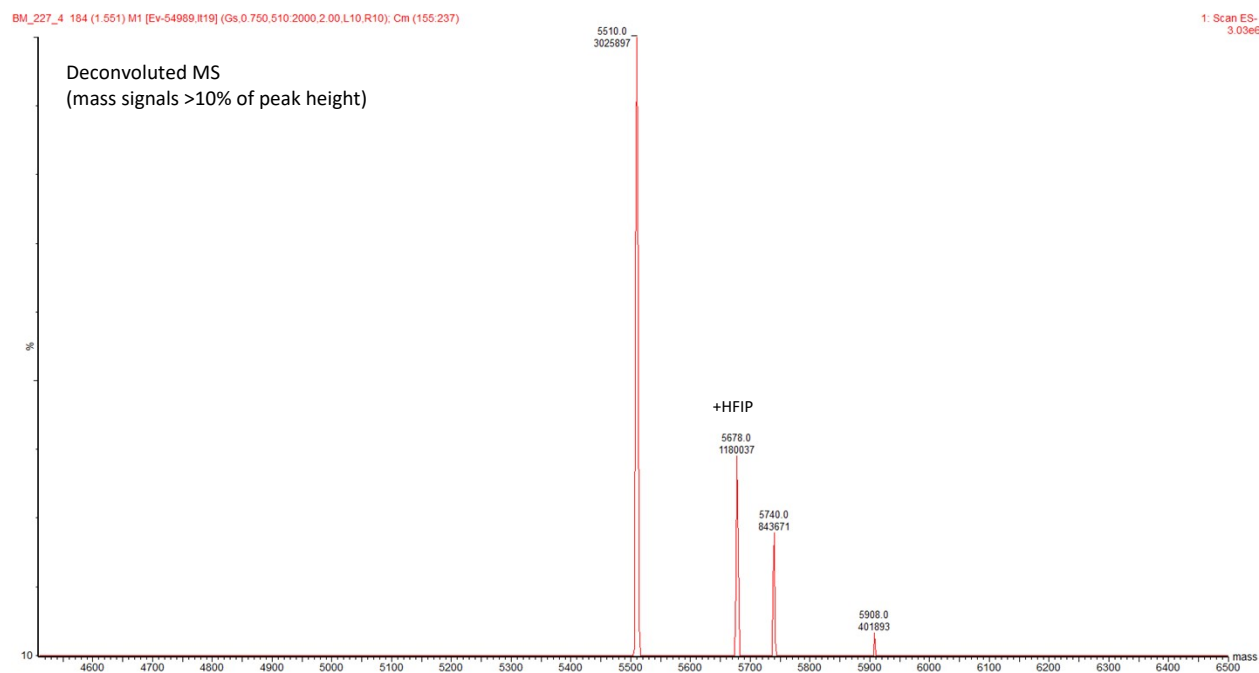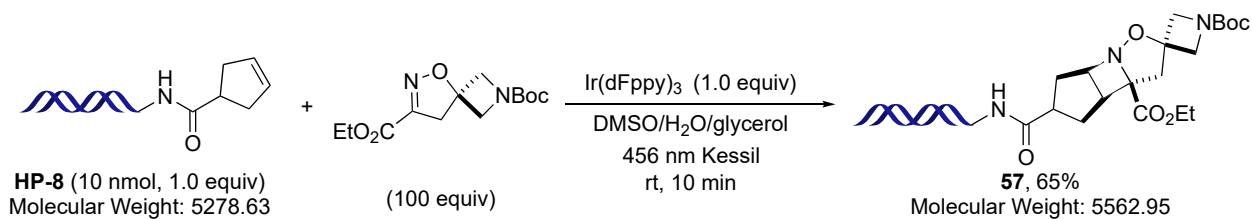

The title compound **57** was synthesized according to **GP-IV** from 2-(*tert*-butyl) 7-ethyl 5-oxa-2,6-diazaspiro[3.4]oct-6-ene-2,7-dicarboxylate and the DNA-tagged alkene **HP-8**. The product was formed with 65% conversion (35% recovered **HP-8**).

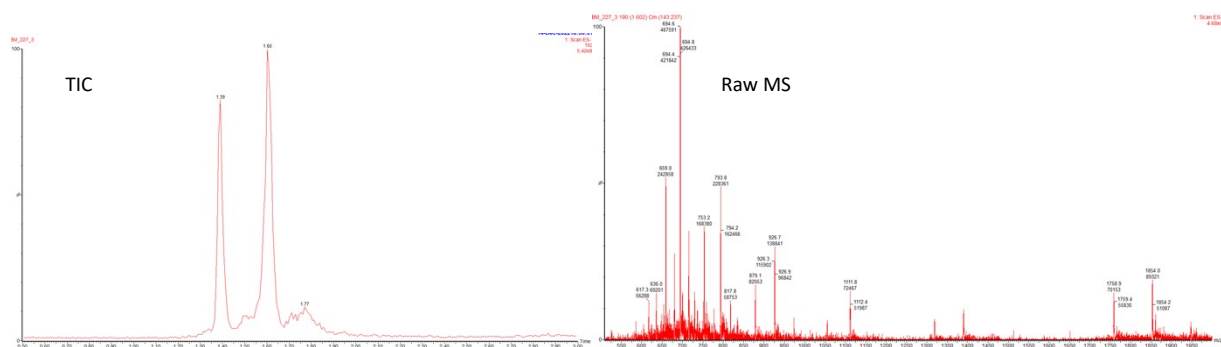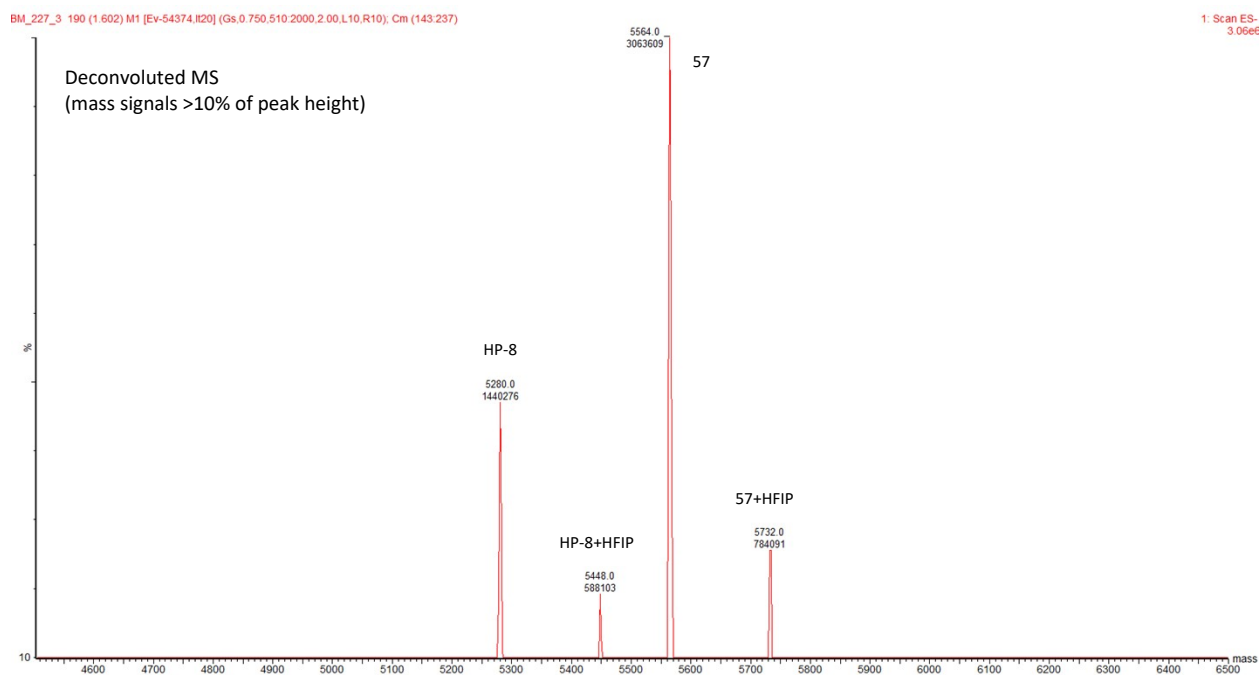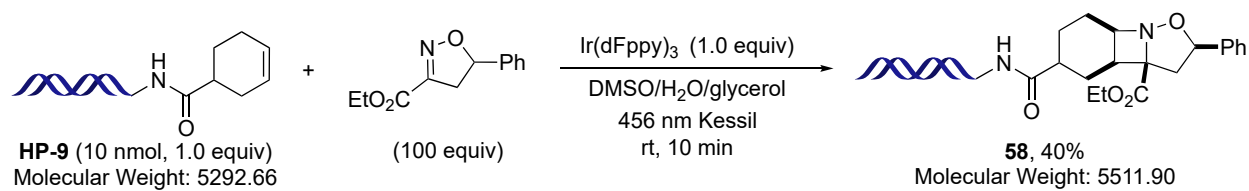

The title compound **58** was synthesized according to **GP-IV** from ethyl 5-phenyl-4,5-dihydroisoxazole-3-carboxylate and the DNA-tagged alkene **HP-9**. The product was formed with 40% conversion (49% recovered **HP-9**).

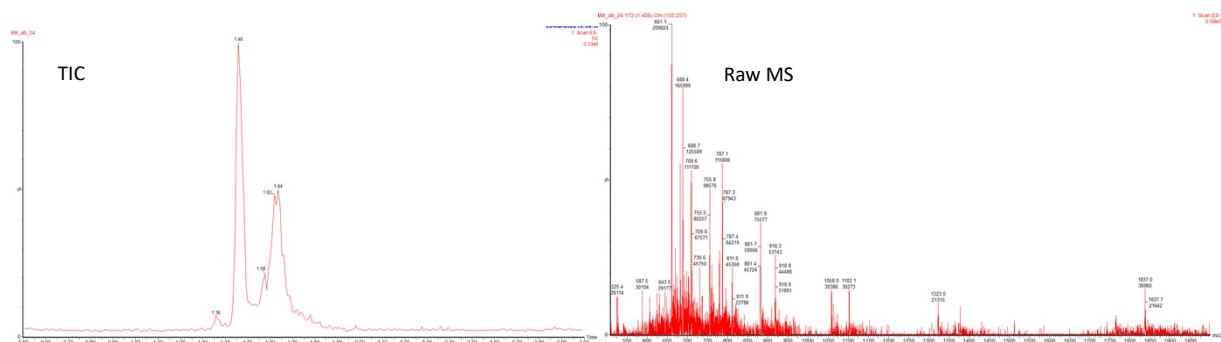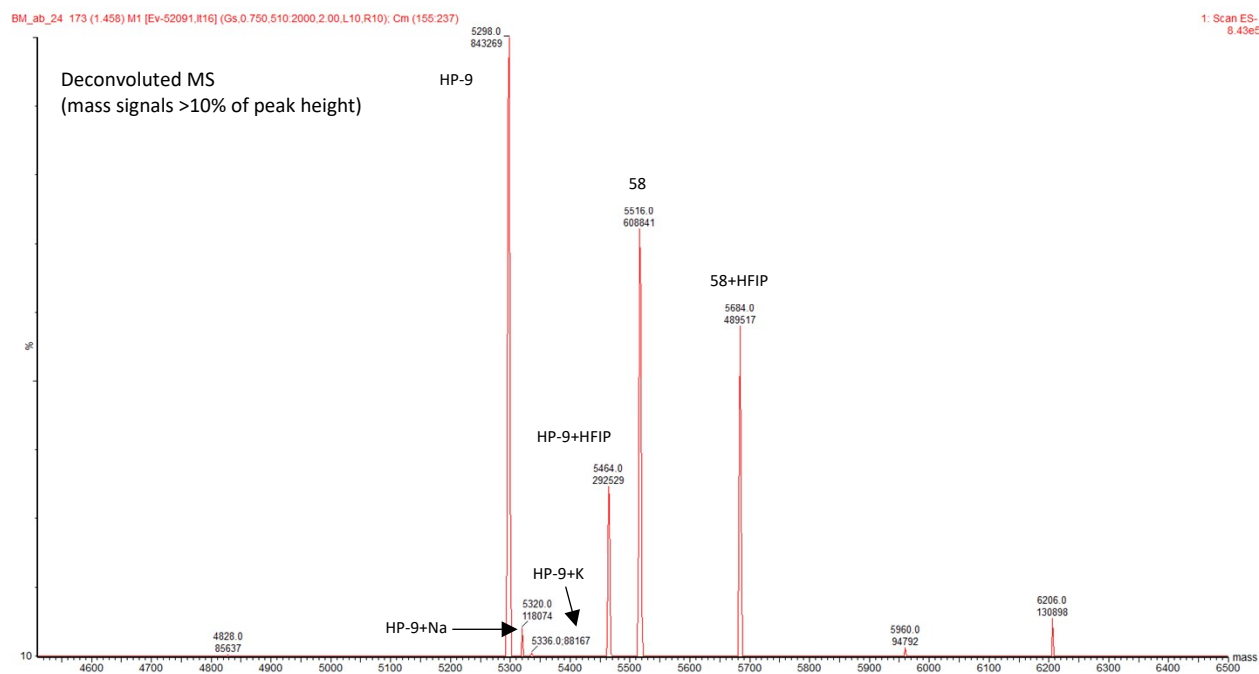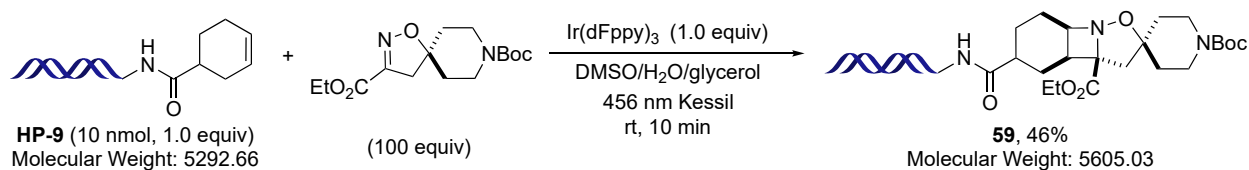

The title compound **59** was synthesized according to **GP-IV** from 8-(*tert*-butyl) 3-ethyl 1-oxa-2,8-diazaspiro[4.5]dec-2-ene-3,8-dicarboxylate and the DNA-tagged alkene **HP-9**. The product was formed with 46% conversion (54% recovered **HP-9**).

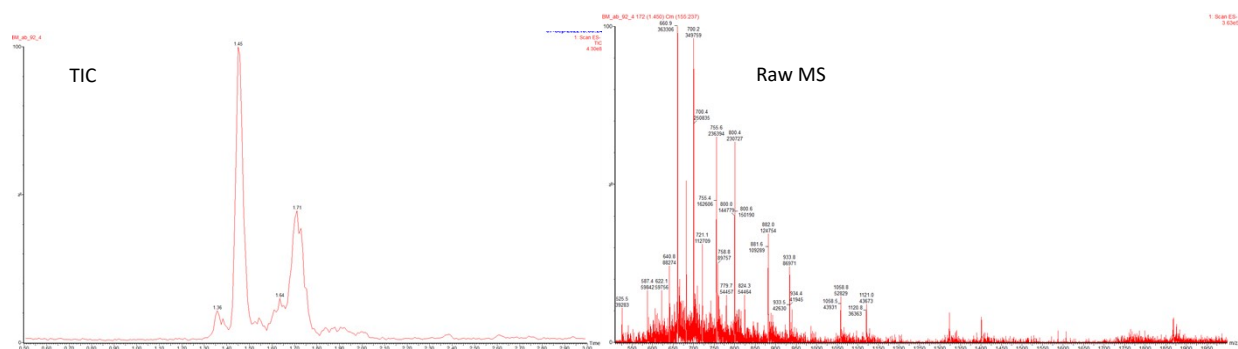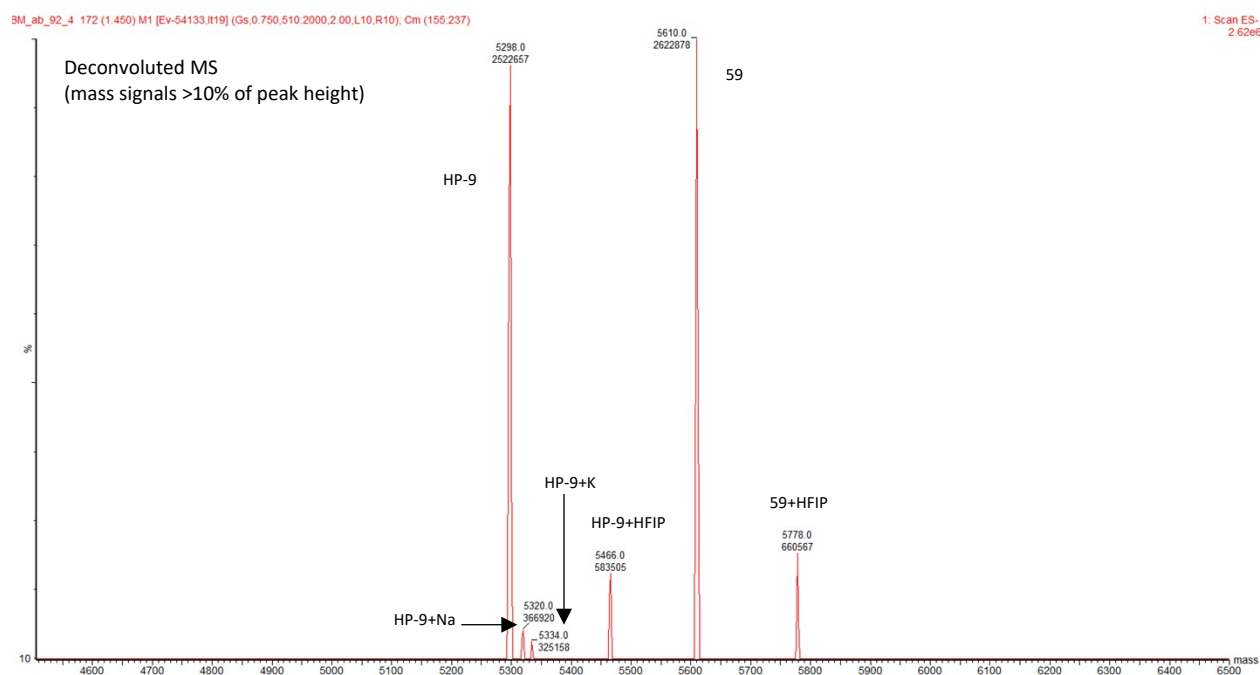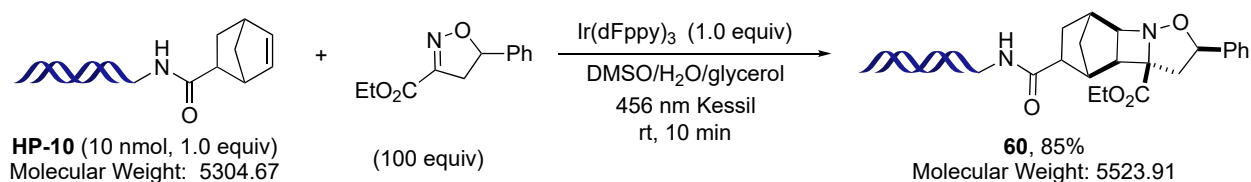

The title compound **60** was synthesized according to **GP-IV** from ethyl 5-phenyl-4,5-dihydroisoxazole-3-carboxylate and the DNA-tagged alkene **HP-10**. The product was formed with 85% conversion (9% recovered **HP-10**).

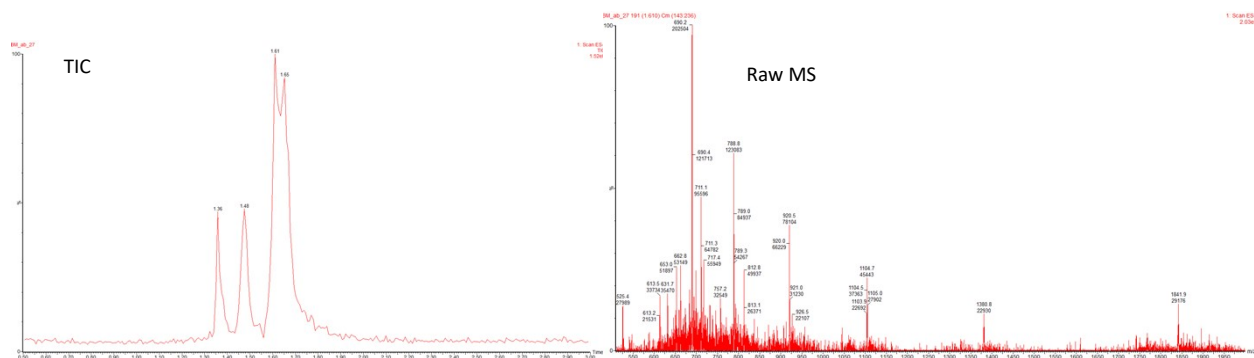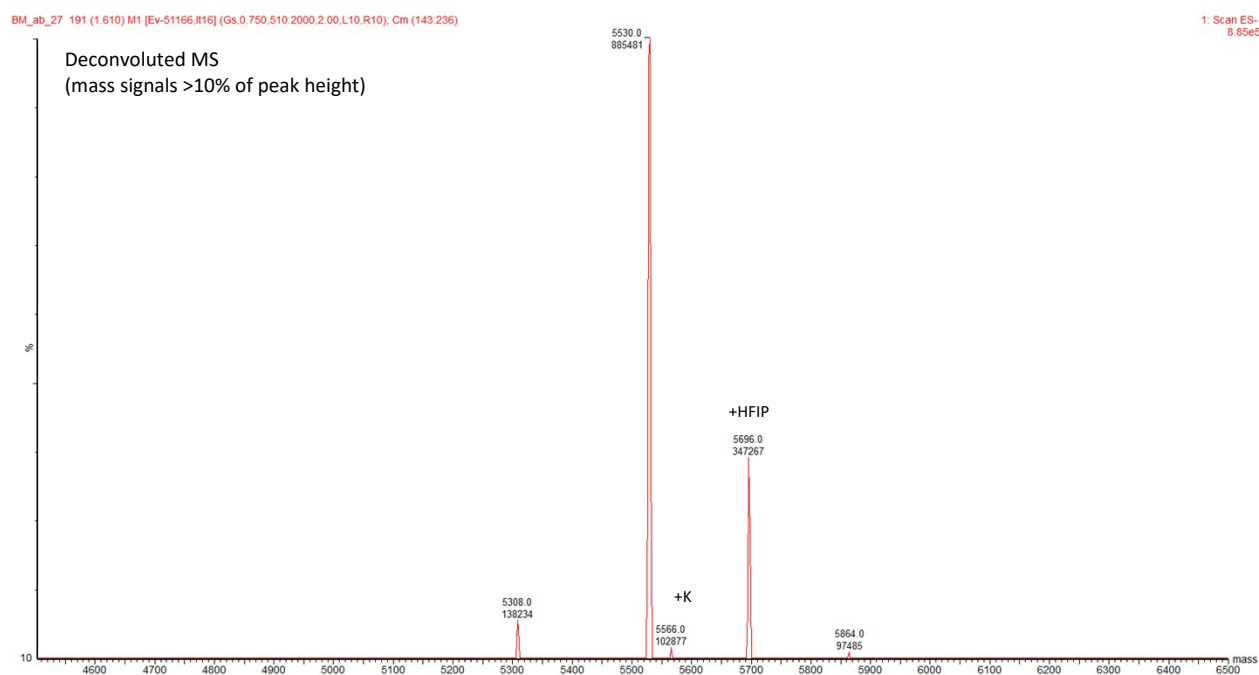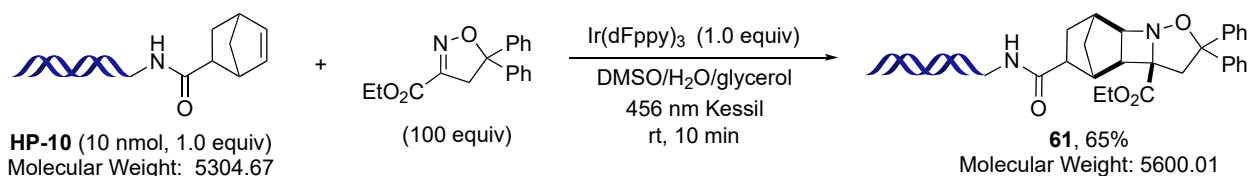

The title compound **61** was synthesized according to **GP-IV** from ethyl 5,5-diphenyl-4,5-dihydroisoxazole-3-carboxylate and the DNA-tagged alkene **HP-10**. The product was formed with 65% conversion.

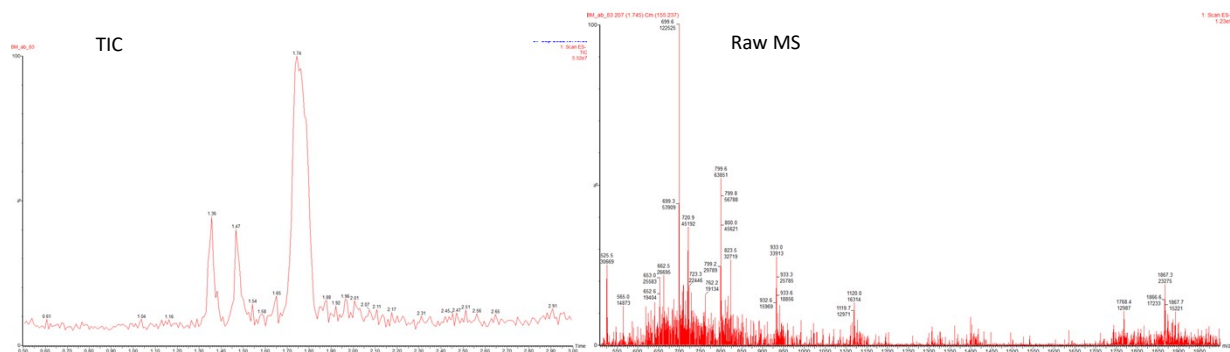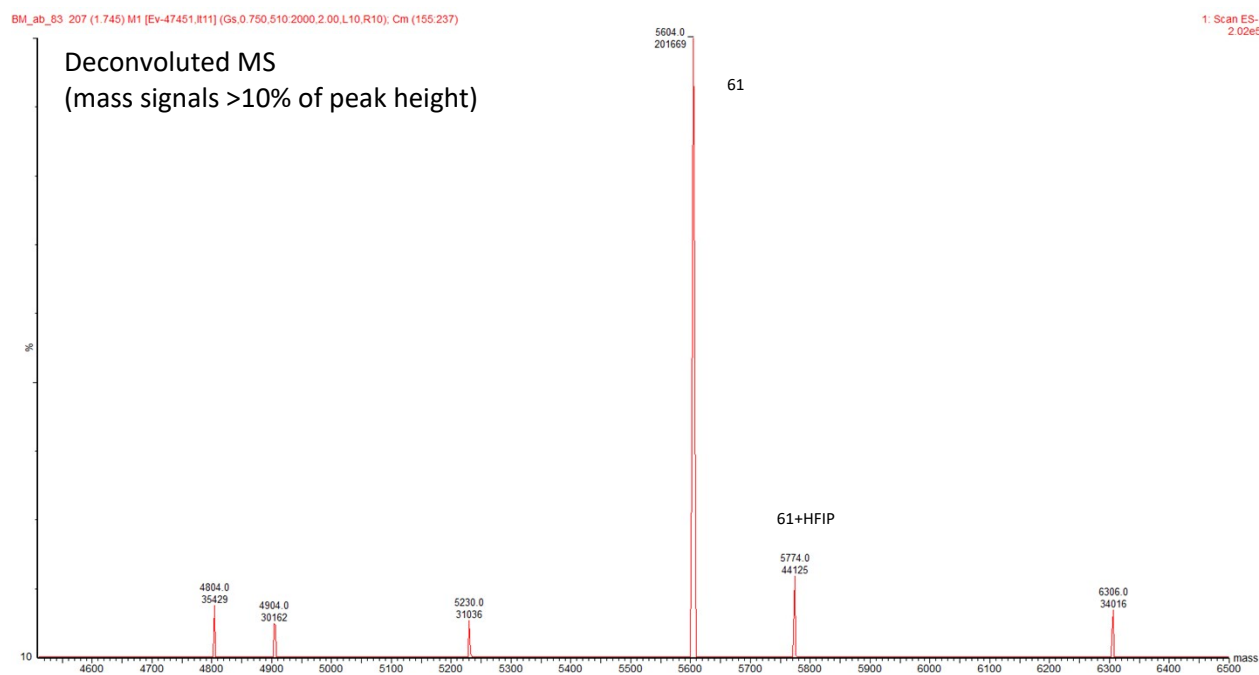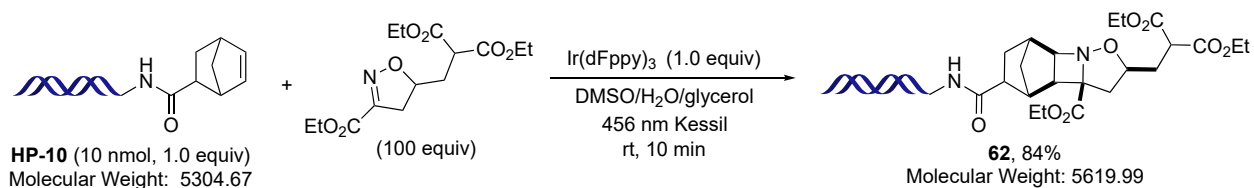

The title compound **62** was synthesized according to **GP-IV** from diethyl 2-((3-(ethoxycarbonyl)-4,5-dihydroisoxazol-5-yl)methyl)malonate and the DNA-tagged alkene **HP-10**. The product was formed with 84% conversion (8.6% double addition product)

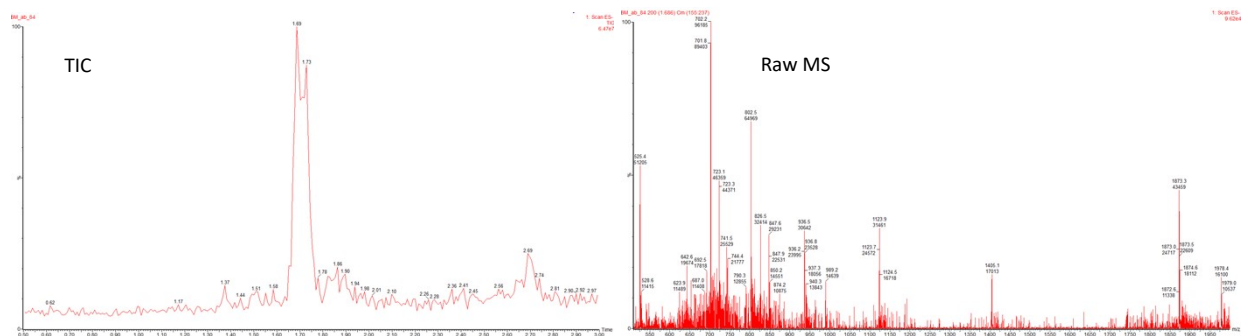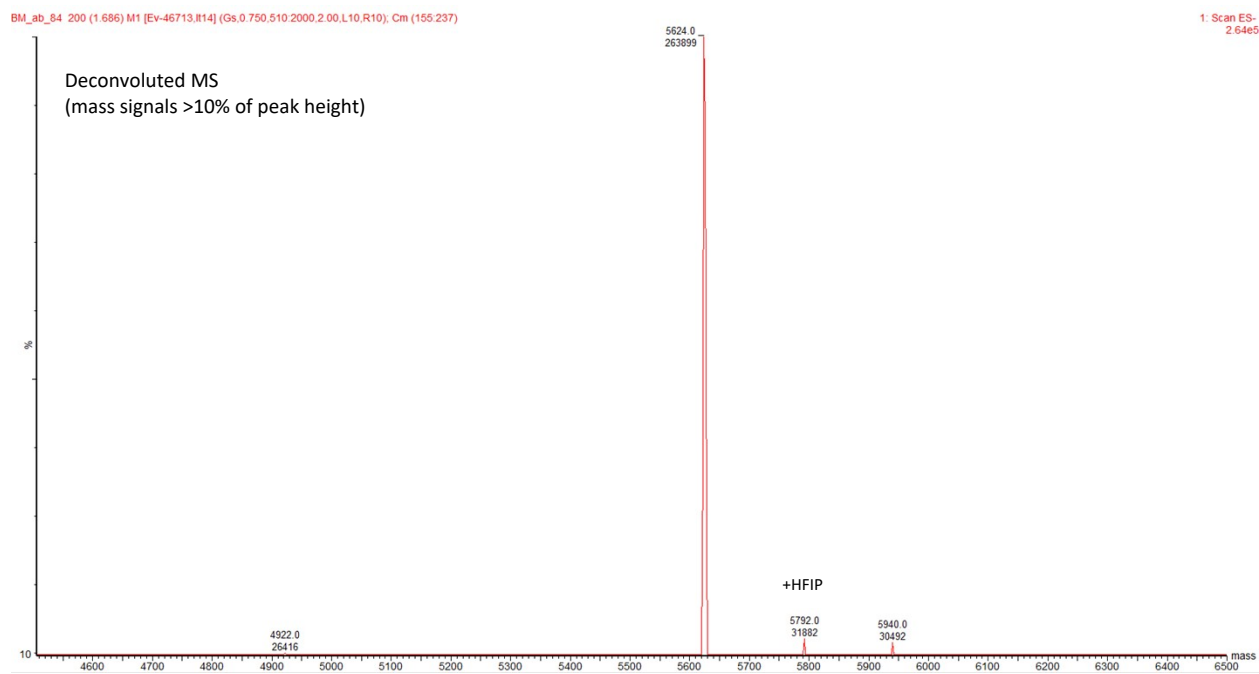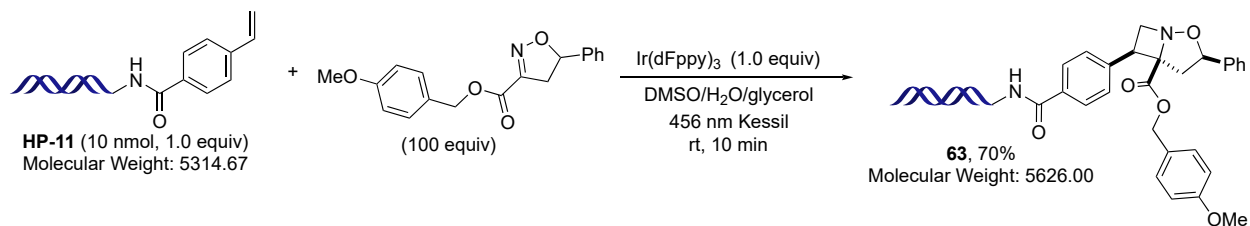

The title compound **63** was synthesized according to **GP-IV** from 4-methoxybenzyl 5-phenyl-4,5-dihydroisoxazole-3-carboxylate and the DNA-tagged alkene **HP-11**. The product was formed with 76% conversion (13% recovered **HP-11**).

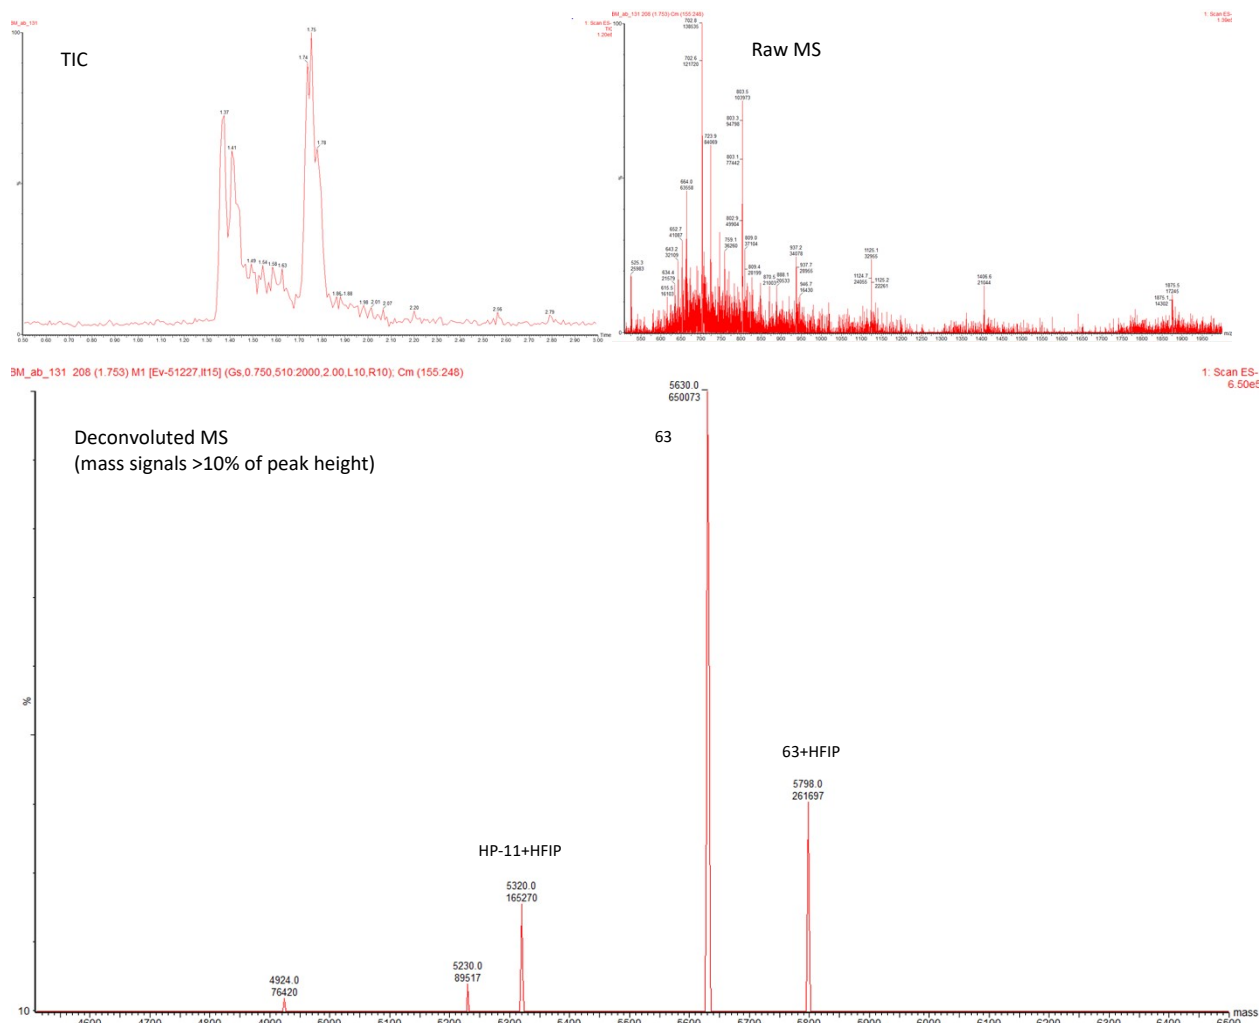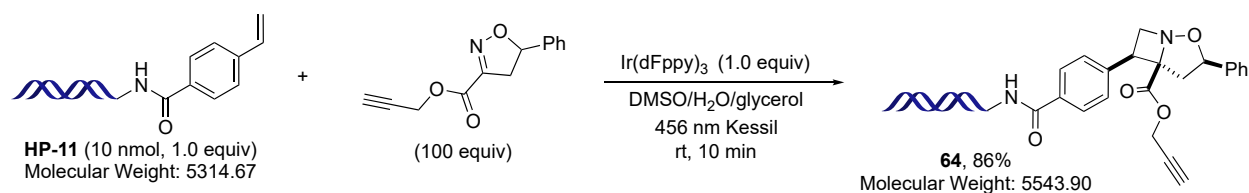

The title compound **64** was synthesized according to **GP-IV** from prop-2-yn-1-yl 5-phenyl-4,5-dihydroisoxazole-3-carboxylate and the DNA-tagged alkene **HP-11**. The product was formed with 86% conversion (13% recovered **HP-11**).

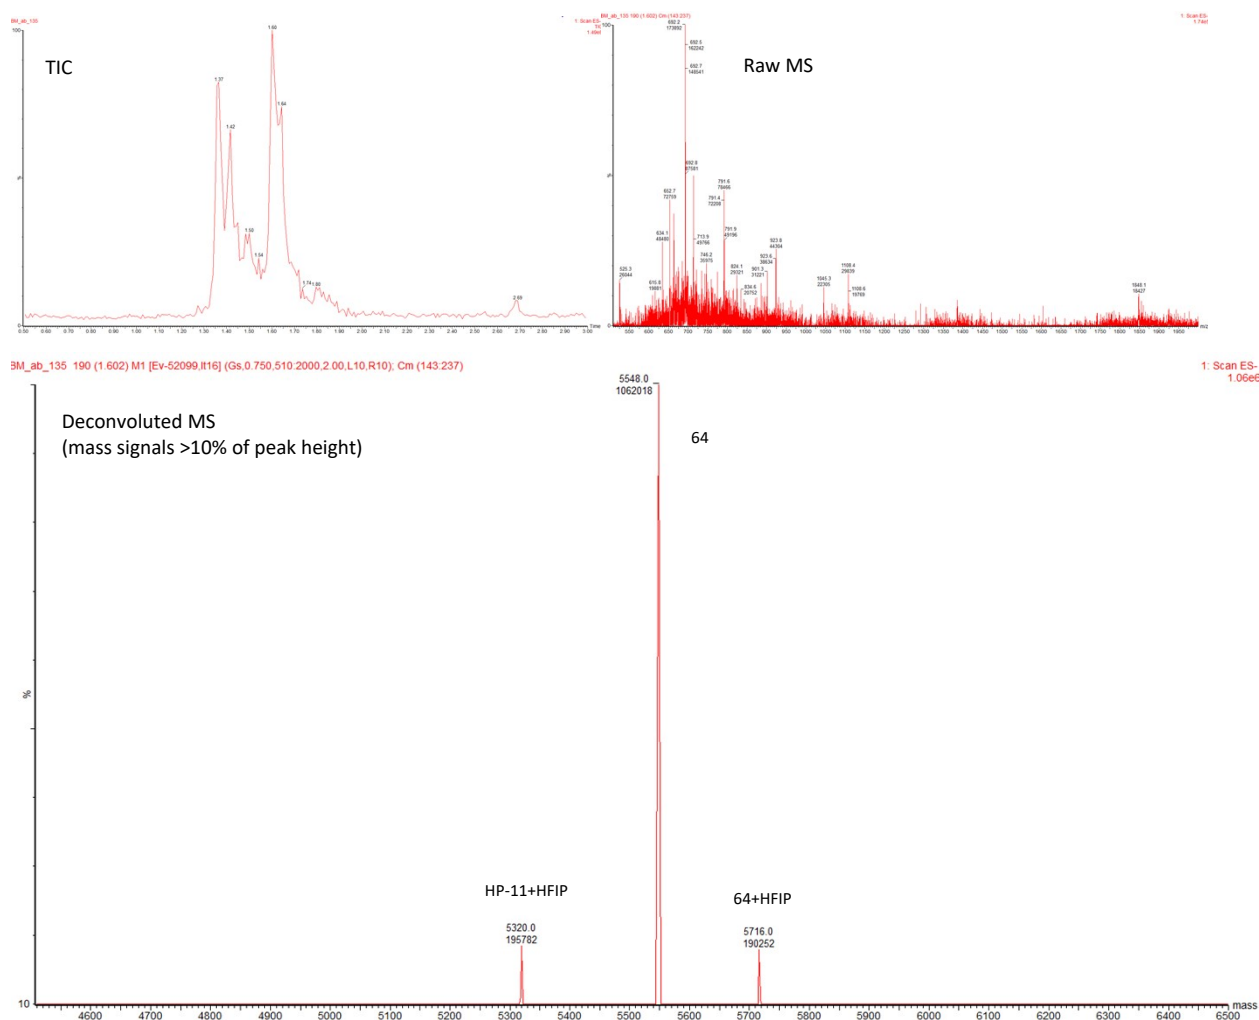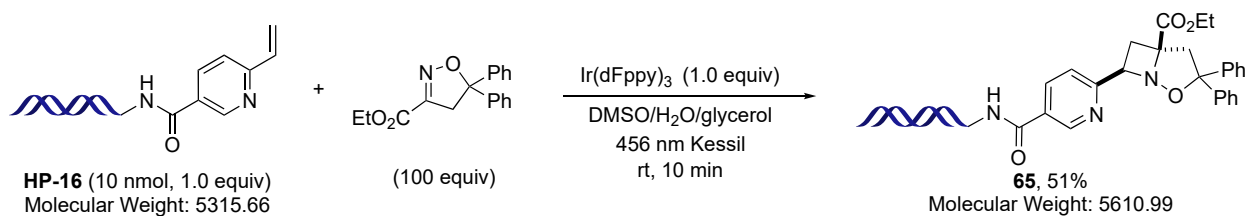

The title compound **65** was synthesized according to **GP-IV** from ethyl 5-phenyl-4,5-dihydroisoxazole-3-carboxylate and the DNA-tagged alkene **HP-16**. The product was formed with 51% conversion.

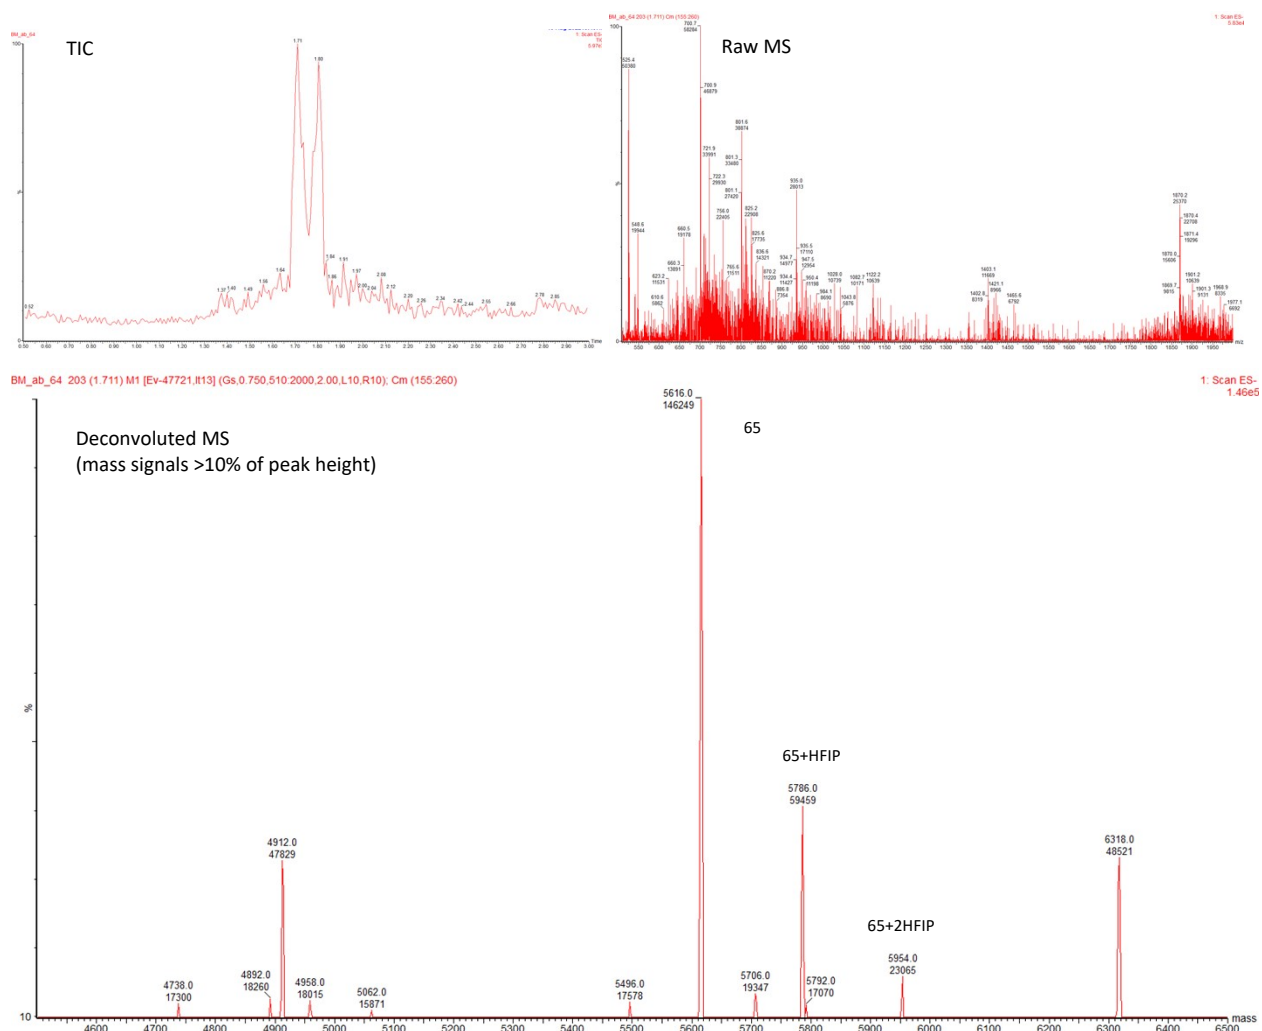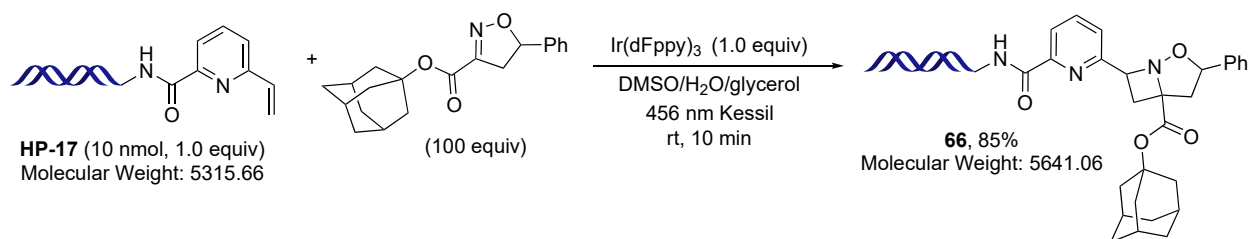

The title compound **66** was synthesized according to **GP-IV** from (3s,5s,7s)-adamantan-1-yl 5-phenyl-4,5-dihydroisoxazole-3-carboxylate and the DNA-tagged alkene **HP-17**. The product was formed with 85% conversion.

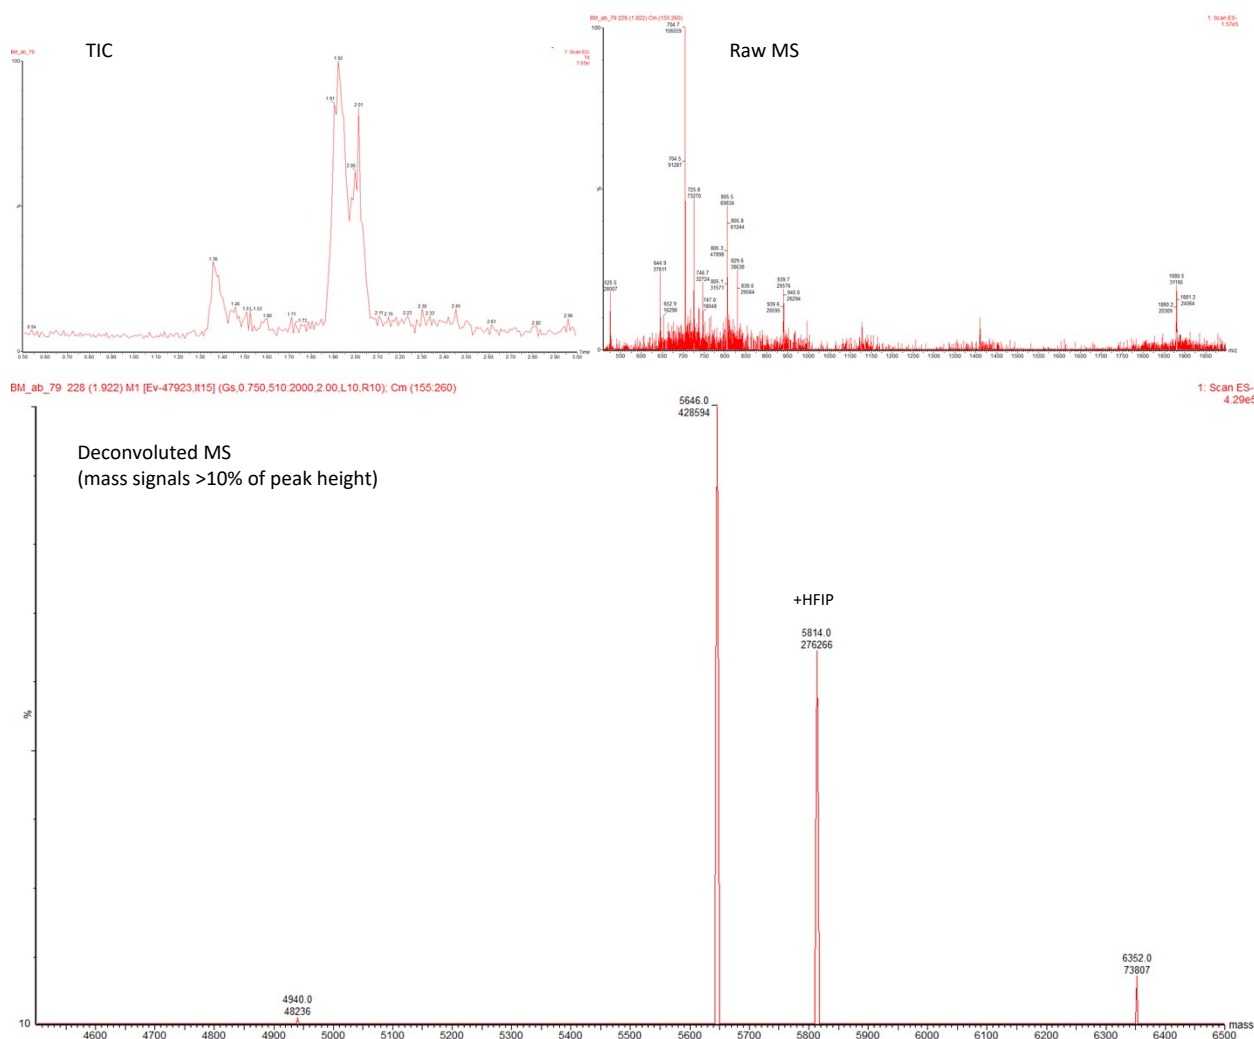

## 13 REFERENCES

1. L. Li, B. Matsuo, G. Levitre, E. J. McClain, E. Voight, E. A. Crane, and G. A. Molander, *Chem. Sci.*, 2023, **14**, 2713-2720
2. M. R. Becker, E. R. Wearing, C. S. Schindler, *Nat. Chem.* 2020, **12**, 898-905.
3. R. Chen, Y. Zhao, S. Fang, W. Long, H. Sun, X. Wan, *Org. Lett.*, 2017, **19**, 5896-5899.
4. M. Xiong, X. Liang, Z. Gao, A. Lei, Y. Pan, *Org. Lett.*, 2019, **21**, 9300-9305.

References for **Section 9**: X-ray Structure Determination (only)

- [1] CrysAlisPro 1.171.42.89a: Rigaku Oxford Diffraction, Rigaku Corporation, Oxford, UK. (2021).
- [2] CrysAlisPro 1.171.42.89a: Rigaku Oxford Diffraction, Rigaku Corporation, Oxford, UK. (2021).
- [3] SCALE3 ABSPACK v1.0.7: an Oxford Diffraction program; Oxford Diffraction Ltd: Abingdon, UK, 2005.
- [4] SHELXT v2018/2: Sheldrick, G.M., Acta Cryst., A, 71, 3-8 (2015).
- [5] SHELXL-2018/3: Sheldrick, G.M., Acta Cryst., A, 71, 3-8 (2015).
- [6] Olex2: Dolomanov, O.V., Bourhis, L.J., Gildea, R.J., Howard, J.A.K., Puschmann, H., J. Appl. Cryst., 42, 339-341 (2009).
